# Supplementary material for: Rates and risk factors for failure of reduction in closed reduction in developmental dysplasia of the hip: a systematic review and meta-analysis
Source: PubMed Central journal article supplement — EFORT Open Rev. 2024 Sep 2;9(9):908–22. doi: 10.1530/EOR-24-0007 (PMC11457818; doi:10.1530/eor-24-0007), 2024-09-02
Supplement: EOR-24-0007supplementary_tables.pdf [file EOR-24-0007supplementary_tables.pdf]

Supplementary Table 1. PRISMA 2020 guideline

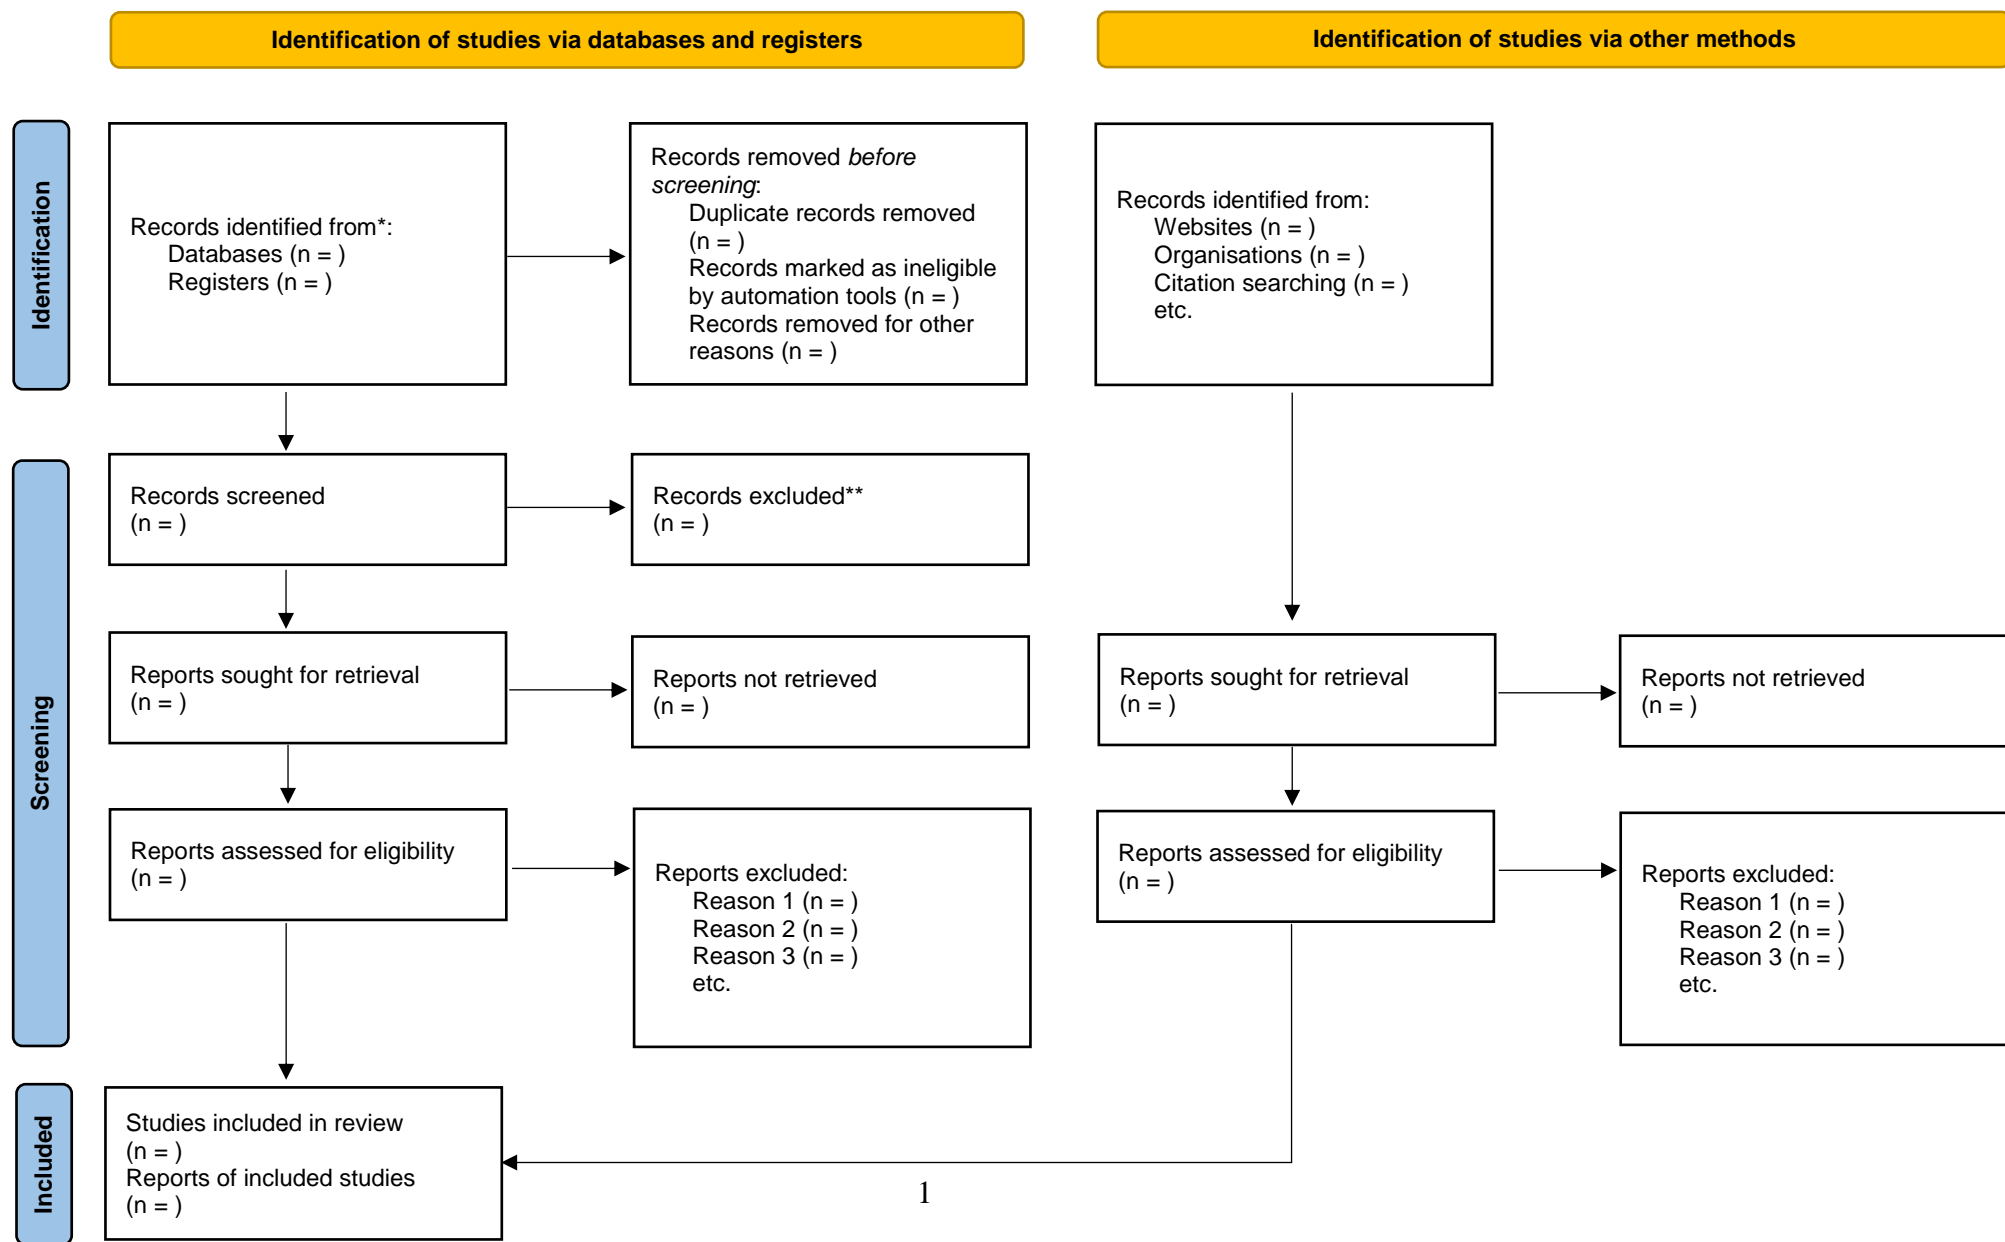

\*Consider, if feasible to do so, reporting the number of records identified from each database or register searched (rather than the total number across all databases/registers).  
\*\*If automation tools were used, indicate how many records were excluded by a human and how many were excluded by automation tools.

*From:* Page MJ, McKenzie JE, Bossuyt PM, Boutron I, Hoffmann TC, Mulrow CD, et al. The PRISMA 2020 statement: an updated guideline for reporting systematic reviews. *BMJ* 2021;372:n71. doi: 10.1136/bmj.n71. For more information, visit: <http://www.prisma-statement.org/>

**Supplementary Table 2. Risk of bias assessment**

|                                     | DOI                                  | Study participation | Study attrition | Prognostic factors                                                                                                                             | Prognostic factor measurement | Outcome(s)                                                                       | Outcome measurement | Study confounding | Statistical analysis and reporting | Overall rate       |
|-------------------------------------|--------------------------------------|---------------------|-----------------|------------------------------------------------------------------------------------------------------------------------------------------------|-------------------------------|----------------------------------------------------------------------------------|---------------------|-------------------|------------------------------------|--------------------|
| Allassaf et al. <sup>1</sup> 2018   | 10.1007/s00590-019-02601-5           | Low                 | N/A             | age, gender, laterality, uni-bilateral, IHDI grade, acetabular index                                                                           | Low                           | intraoperative failure, postoperative failure, failed reduction                  | Low                 | Low               | Low                                | High quality       |
| Arneill et al. <sup>2</sup> 2021    | 10.1302/2633-1462.28.BJO2021-0088.R1 | Moderate            | N/A             | gender, age at Pavlik application, age at closed reduction, laterality, US classification, adductor tenotomy                                   | Low                           | intraoperative failure, postoperative failure, failed reduction, overall failure | Low                 | Low               | Low                                | High quality       |
| Bachy et al. <sup>3</sup> 2012      | 10.1007/s11832-012-0382-6            | Low                 | High            | age, gender, uni-bilateral, previous treatment, traction                                                                                       | Moderate                      | postoperative failure                                                            | Low                 | Moderate          | N/A                                | Acceptable quality |
| Barakat et al. <sup>4</sup> 2017    | 10.1097/BCO.000000000000478          | Low                 | Low             | age, laterality, Tönnis grade, acetabular index                                                                                                | Low                           | overall failure                                                                  | Low                 | Low               | Low                                | High quality       |
| Bhaskar et al. <sup>5</sup> 2016    | 10.4103/0019-5413.189610             | Low                 | N/A             | uni-bilateral, acetabular index, ossific nucleus                                                                                               | Low                           | redislocation                                                                    | Low                 | Moderate          | Low                                | High quality       |
| Danielsson et al. <sup>6</sup> 2000 | 10.1080/000164700317411816           | Low                 | Low             | age, gender, uni-bilateral, laterality                                                                                                         | Low                           | intraoperative failure, redislocation                                            | Low                 | Moderate          | N/A                                | High quality       |
| Daoud et al. <sup>7</sup> 1996      | 10.2106/00004623-199601000-00005     | Low                 | N/A             | age, gender, uni-bilateral, laterality                                                                                                         | Low                           | failed reduction, redislocation                                                  | Low                 | Moderate          | N/A                                | High quality       |
| Elerson et al. <sup>8</sup> 2022    | 10.1097/BPO.0000000000002038         | Low                 | Low             | traction                                                                                                                                       | Low                           | overall failure                                                                  | Low                 | Moderate          | Low                                | High quality       |
| Elghobashy et al. <sup>9</sup> 2021 | 10.1097/BPB.0000000000000749         | Moderate            | N/A             | Tönnis grade, FAZ grade                                                                                                                        | Low                           | overall failure                                                                  | Low                 | Moderate          | Low                                | Acceptable quality |
| Fleissner et al. <sup>10</sup> 1994 | 10.1097/01241398-199409000-00016     | Moderate            | N/A             | limbus type, cone of stability                                                                                                                 | Low                           | redislocation                                                                    | Moderate            | Moderate          | Moderate                           | Acceptable quality |
| Forlin et al. <sup>11</sup> 1992    | 10.2106/00004623-199274080-00003     | Low                 | N/A             | age, gender, laterality, uni-bilateral, tenotomy, shape of limbus, medialization ratio, distance from H-line, width of pool of contrast medium | Low                           | redislocation                                                                    | Low                 | Moderate          | N/A                                | High quality       |

|                                       |                                    |          |     |                                                                                                                                                                                                         |     |                                                  |     |          |          |                    |
|---------------------------------------|------------------------------------|----------|-----|---------------------------------------------------------------------------------------------------------------------------------------------------------------------------------------------------------|-----|--------------------------------------------------|-----|----------|----------|--------------------|
| Huang et al. <sup>12</sup> 1997       | 10.1097/00004694-199703000-00009   | Low      | N/A | age, laterality, uni-bilateral, Tönnis grade, acetabular index, traction                                                                                                                                | Low | failed reduction, redislocation, overall failure | Low | Low      | N/A      | High quality       |
| Jones et al. <sup>13</sup> 1992       | 10.1097/01241398-199211000-00004   | Low      | N/A | age, laterality, uni-bilateral                                                                                                                                                                          | Low | overall failure                                  | Low | Moderate | N/A      | High quality       |
| Kubo et al. <sup>14</sup> 2019        | 10.1097/BPB.0000000000000604       | Low      | N/A | Graf grade                                                                                                                                                                                              | Low | postoperative failure, redislocation             | Low | Moderate | N/A      | High quality       |
| Li et al. <sup>15</sup> 2019          | 10.1097/BPB.0000000000000586       | Low      | N/A | traction, Tönnis grade                                                                                                                                                                                  | Low | failed reduction                                 | Low | Moderate | Low      | High quality       |
| Li et al. <sup>16</sup> 2020          | 10.1097/BPB.0000000000000672       | Low      | N/A | age, Tönnis grade                                                                                                                                                                                       | Low | redislocation                                    | Low | Moderate | Low      | High quality       |
| Mitani et al. <sup>17</sup> 1997      | 10.1302/0301-620x.79b5.7728        | Moderate | N/A | limbus type                                                                                                                                                                                             | Low | redislocation                                    | Low | Moderate | Moderate | Acceptable quality |
| Morris et al. <sup>18</sup> 2021      | 10.2106/JBJS.20.00562              | Low      | N/A | age, gender, IHDI grade                                                                                                                                                                                 | Low | intraoperative failure                           | Low | Low      | Low      | High quality       |
| Murray et al. <sup>19</sup> 2007      | -                                  | Low      | N/A | uni-bilateral                                                                                                                                                                                           | Low | failed reduction                                 | Low | Low      | Low      | High quality       |
| Pospischill et al. <sup>20</sup> 2012 | 10.1007/s11999-011-1929-4          | Low      | N/A | uni-bilateral, Graf grade, previous brace treatment, ossific nucleus                                                                                                                                    | Low | intraoperative failure                           | Low | Low      | Low      | High quality       |
| Ramo et al. <sup>21</sup> 2018        | 10.1097/BPO.0000000000000733       | Moderate | N/A | IHDI grade, Tönnis grade                                                                                                                                                                                | Low | overall failure                                  | Low | Moderate | Low      | High quality       |
| Sankar et al. <sup>22</sup> 2019      | 10.1097/BPO.0000000000000895       | Low      | Low | age, gender, laterality, uni-bilateral, anamnesis, ossific nucleus, previous brace treatment, traction, prereluction reducibility, soft tissue release, arthrogram, IHDI grade, length of spica casting | Low | failed reduction, redislocation                  | Low | Low      | Low      | High quality       |
| Schoenecker et al. <sup>23</sup> 1995 | 10.1097/01241398-199511000-00008   | Moderate | N/A | age, modified Tönnis grade, acetabular index                                                                                                                                                            | Low | failed reduction, redislocation, overall failure | Low | Low      | N/A      | Acceptable quality |
| Senaran et al. <sup>24</sup> 2007     | 10.1097/01.bpb.0000248567.49089.f0 | Low      | N/A | age, gender, laterality, uni-bilateral, duration of previous brace treatment, Harcke grade                                                                                                              | Low | failed reduction, redislocation, overall failure | Low | Low      | N/A      | High quality       |
| Sucato et al. <sup>25</sup> 2017      | 10.1097/BPO.0000000000000747       | Low      | N/A | traction, Tönnis grade                                                                                                                                                                                  | Low | overall failure                                  | Low | Moderate | Low      | High quality       |
| Talathi et al. <sup>26</sup> 2020     | 10.1097/BPO.00000000000001429      | Low      | Low | age, gender, laterality, uni-bilateral, previous brace treatment, hip abduction, prereluction                                                                                                           | Low | overall failure                                  | Low | Low      | Low      | High quality       |

|                                    |                                       |     |     |                                                                                                                                                              |     |                       |     |          |     |              |
|------------------------------------|---------------------------------------|-----|-----|--------------------------------------------------------------------------------------------------------------------------------------------------------------|-----|-----------------------|-----|----------|-----|--------------|
|                                    |                                       |     |     | reducibility, Graf grade, femoral head coverage (US), IHDI grade                                                                                             |     |                       |     |          |     |              |
| Tennant et al. <sup>27</sup> 2016  | 10.1302/0301-620X.981311.36606        | Low | N/A | age, gender, previous brace treatment, laterality, uni-bilateral, ossific nucleus, acetabular index, Tönnis grade, soft tissue release                       | Low | overall failure       | Low | Low      | Low | High quality |
| Tennant et al. <sup>28</sup> 2019  | 10.1097/BPO.0000000000001297          | Low | N/A | Tönnis grade                                                                                                                                                 | Low | overall failure       | Low | Moderate | N/A | High quality |
| Terjesen et al. <sup>29</sup> 2020 | 10.1302/2633-1462.14.BJO-2019-0005.R1 | Low | N/A | age, traction                                                                                                                                                | Low | overall failure       | Low | Moderate | Low | High quality |
| Ucpunar et al. <sup>30</sup> 2020  | 10.1007/s43465-020-00079-6            | Low | N/A | age, gender, previous brace treatment, IHDI grade                                                                                                            | Low | overall failure       | Low | Low      | N/A | High quality |
| Yilar et al. <sup>31</sup> 2021    | 10.1097/BPB.0000000000000752          | Low | N/A | age, gender, laterality, uni-bilateral, Tönnis grade, acetabular index                                                                                       | Low | redislocation         | Low | Low      | Low | High quality |
| Yu et al. <sup>32</sup> 2021       | 10.1016/j.ultrasmedbio.2020.08.010    | Low | N/A | age, gender, laterality, uni-bilateral                                                                                                                       | Low | postoperative failure | Low | Moderate | N/A | High quality |
| Yuan et al. <sup>33</sup> 2020     | 10.1302/1863-2548.14.200132           | Low | N/A | age, gender, laterality, uni-bilateral, hip abduction, IHDI grade, presence of ossific nucleus, acetabular index, inverted labrum, delineation of arthrogram | Low | failed reduction      | Low | Low      | Low | High quality |
| Zhang et al. <sup>34</sup> 2020    | 10.1186/s13018-020-02098-3            | Low | N/A | age, gender, uni-bilateral, presence of ossific nucleus, duration of previous brace treatment, Tönnis grade, IHDI grade, acetabular index, walking           | Low | redislocation         | Low | Low      | Low | High quality |

## REFERENCES

1. Alassaf N: Treatment of developmental dysplasia of the hip (DDH) between the age of 18 and 24 months. *Eur J Orthop Surg Traumatol* 2020 May;30(4):637-641.
2. Arneill M, Cosgrove A, Robinson E: Should closed reduction of the dislocated hip be attempted after failed Pavlik harness treatment in developmental dysplasia of the hip? *Bone Jt Open* 2021 Aug;2(8):584-588.
3. Bachy M, Thevenin-Lemoine C, Rogier A, Mary P, Ducou Le Pointe H, Vialle R: Utility of magnetic resonance imaging (MRI) after closed reduction of developmental dysplasia of the hip. *J Child Orthop* 2012 Mar;6(1):13-20.
4. Barakat AS, Zein AB, Arafa AS, Azab MA, Reda W, Hegazy MM, Al Barbary HM, Kaddah MA: Closed reduction with or without adductor tenotomy for developmental dysplasia of the hip presenting at walking age. *Curr Orthop Pract* 2017 Mar;28(2):195-199.

5. Bhaskar A, Desai H, Jain G: Risk factors for early redislocation after primary treatment of developmental dysplasia of the hip: Is there a protective influence of the ossific nucleus? *Indian J Orthop* 2016 Sep;50(5):479-485.
6. Danielsson L: Late-diagnosed DDH: a prospective 11-year follow-up of 71 consecutive patients (75 hips). *Acta Orthop Scand* 2000 Jun;71(3):232-42.
7. Daoud A, Saighi-Bououina A: Congenital dislocation of the hip in the older child. The effectiveness of overhead traction. *J Bone Joint Surg Am* 1996 Jan;78(1):30-40.
8. Elerson EE, Martin BD, Muchow RD, Pierce WA, Jo CH, Hinds SA, Birch JG: Outpatient Bryant's Overhead Traction Does Not Affect the Rate of Open Reduction or Avascular Necrosis in Developmental Dislocation of the Hip. *Journal of Pediatric Orthopaedics* 2022 Mar 1;42(3):e266-e270.
9. Elghobashy OH, Kutty S, Dawood AA, Hadrawi AT, Alharbi HH, Barakat AS, Zohdy KK, Gaine WJ: Proposal of a novel predictive radiological method to assess the possibility of closed reduction in late presenting developmental dysplasia of the hip: the femoro-acetabular zones. *J Pediatr Orthop B* 2021 Mar 1;30(2):132-138.
10. Fleissner PR Jr, Ciccarelli CJ, Eilert RE, Chang FM, Glancy GL: The success of closed reduction in the treatment of complex developmental dislocation of the hip. *J Pediatr Orthop* 1994 Sep-Oct;14(5):631-5.
11. Forlin E, Choi IH, Guille JT, Bowen JR, Glutting J: Prognostic factors in congenital dislocation of the hip treated with closed reduction. The importance of arthrographic evaluation. *J Bone Joint Surg Am* 1992 Sep;74(8):1140-52.
12. Huang SC, Wang JH: A comparative study of nonoperative versus operative treatment of developmental dysplasia of the hip in patients of walking age. *J Pediatr Orthop* 1997 Mar-Apr;17(2):181-8.
13. Jones GT, Schoenecker PL, Dias LS: Developmental hip dysplasia potentiated by inappropriate use of the Pavlik harness. *J Pediatr Orthop* 1992 Nov-Dec;12(6):722-6.
14. Kubo H, Pilge H, Holthoff JP, Westhoff B, Krauspe R: MRI reveals unrecognized treatment failures after application of Fettweis plaster in children with unstable hip joints. *J Pediatr Orthop B* 2019 Sep;28(5):430-435.
15. Li YQ, Li M, Guo YM, Shen XT, Mei HB, Chen SY, Shao JF, Tang SP, Canavese F, Xu HW: Traction does not decrease failure of reduction and femoral head avascular necrosis in patients aged 6-24 months with developmental dysplasia of the hip treated by closed reduction: a review of 385 patients and meta-analysis. *J Pediatr Orthop B* 2019 Sep;28(5):436-441.
16. Li Y, Lin X, Liu Y, Li J, Liu Y, Pereira B, Canavese F, Xu HW: Effect of age on radiographic outcomes of patients aged 6-24 months with developmental dysplasia of the hip treated by closed reduction. *J Pediatr Orthop B* 2020 Sep;29(5):431-437.
17. Mitani S, Nakatsuka Y, Akazawa H, Aoki K, Inoue H: Treatment of developmental dislocation of the hip in children after walking age. Indications from two-directional arthrography. *J Bone Joint Surg Br* 1997 Sep;79(5):710-8.
18. Morris WZ, Hinds S, Worrall H, Jo CH, Kim HKW: Secondary Surgery and Residual Dysplasia Following Late Closed or Open Reduction of Developmental Dysplasia of the Hip. *J Bone Joint Surg Am* 2021 Feb 3;103(3):235-242.
19. Murray T, Cooperman DR, Thompson GH, Ballock T: Closed reduction for treatment of development dysplasia of the hip in children. *Am J Orthop (Belle Mead NJ)*. 2007 Feb;36(2):82-4.
20. Pospischill R, Weninger J, Ganger R, Altenhuber J, Grill F: Does open reduction of the developmental dislocated hip increase the risk of osteonecrosis? *Clin Orthop Relat Res* 2012 Jan;470(1):250-60.

21. Ramo BA, De La Rocha A, Sucato DJ, Jo CH: A New Radiographic Classification System for Developmental Hip Dysplasia is Reliable and Predictive of Successful Closed Reduction and Late Pelvic Osteotomy. *J Pediatr Orthop* 2018 Jan;38(1):16-21.
22. Sankar WN, Gornitzky AL, Clarke NMP, Herrera-Soto JA, Kelley SP, Matheney T, Mulpuri K, Schaeffer EK, Upasani VV, Williams N, Price CT, International Hip Dysplasia Institute: Closed Reduction for Developmental Dysplasia of the Hip: Early-term Results From a Prospective, Multicenter Cohort. *J Pediatr Orthop* 2019 Mar;39(3):111-118.
23. Schoenecker PL, Dollard PA, Sheridan JJ, Strecker WB: Closed reduction of developmental dislocation of the hip in children older than 18 months. *J Pediatr Orthop* 1995 Nov-Dec;15(6):763-7.
24. Senaran H, Bowen JR, Härke HT: Avascular necrosis rate in early reduction after failed Pavlik harness treatment of developmental dysplasia of the hip. *J Pediatr Orthop* 2007 Mar;27(2):192-7.
25. Sucato DJ, De La Rocha A, Lau K, Ramo BA: Overhead Bryant's Traction Does Not Improve the Success of Closed Reduction or Limit AVN in Developmental Dysplasia of the Hip. *J Pediatr Orthop* 2017 Mar;37(2):e108-e113.
26. Talathi NS, Trionfo A, Patel NM, Upasani VV, Matheney T, Mulpuri K, Sankar WN: Should I Plan to Open? Predicting the Need for Open Reduction in the Treatment of Developmental Dysplasia of the Hip. *J Pediatr Orthop* 2020 May-Jun;40(5):e329-e334.
27. Tennant SJ, Eastwood DM, Calder P, Hashemi-Nejad A, Catterall A: A protocol for the use of closed reduction in children with developmental dysplasia of the hip incorporating open psoas and adductor releases and a short-leg cast: Mid-term outcomes in 113 hips. *Bone Joint J* 2016 Nov;98-B(11):1548-1553.
28. Tennant SJ, Hashemi-Nejad A, Calder P, Eastwood DM: Bilateral Developmental Dysplasia of the Hip: Does Closed Reduction Have a Role in Management? Outcome of Closed and Open Reduction in 92 Hips. *J Pediatr Orthop* 2019 Apr;39(4):e264-e271.
29. Terjesen T, Horn J: Management of late-detected DDH in children under three years of age: 49 children with follow-up to skeletal maturity. *Bone Jt Open* 2020 Oct 27;1(4):55-63.
30. Ucpunar H, Mert M, Camurcu Y, Sofu H, Yildirim T, Bayhan AI: Does Adductor Tenotomy Need During Closed Reduction Have a Prognostic Value in the Treatment of Developmental Dysplasia of the Hip Between 6 and 12 Months of Age? "Adductor Tenotomy in the Treatment of Developmental Dysplasia". *Indian J Orthop* 2020 Mar 9;54(4):486-494.
31. Yilar S, Köse M, Tuncer K, Karsan O, Topal M, Ezirmik N: Impact of presence of ossific nucleus on results of closed reduction in treatment of developmental dysplasia of the hip (302 hips). *J Pediatr Orthop B* 2021 Mar 1;30(2):126-131.
32. Yu J, Duan F, Guo W, Wang D, Qin X, Fu G, Chen T: Consistency of Indices Obtained via Hip Medial Ultrasound and Magnetic Resonance Imaging in Reduction and Spica Cast Treatment for Developmental Dysplasia of the Hip. *Ultrasound Med Biol* 2021 Jan;47(1):58-67.
33. Yuan Z, Li Y, Hong K, Wu J, Canavese F, Xu H: Poor delineation of labrum and acetabular surface on arthrogram is a predictor of early failure of closed reduction in children aged six to 24 months with developmental dysplasia of the hip. *J Child Orthop* 2020 Oct 1;14(5):372-378.
34. Zhang Z, Li H, Li H, Zhang Z: Timing for closed reduction procedure for developmental dysplasia of the hip and its failure analysis. *BMC Musculoskelet Disord* 2020 Sep 14;21(1):613.

**Supplementary Table 3.** Basic characteristics of analyzed groups

|            | <b>Number of studies/cohorts</b> | <b>Number of patients (hips)</b> | <b>Average number of patients (hips)</b> | <b>Range number of patients (hips)</b> | <b>Age in months (range)</b> | <b>Follow up time (range)</b>    |
|------------|----------------------------------|----------------------------------|------------------------------------------|----------------------------------------|------------------------------|----------------------------------|
| Group 0-24 | 27                               | 2.304 <sup>1</sup> (2.955)       | 92 (109)                                 | 13-385 (17-440)                        | 0-24                         | 0 months-20.8 years <sup>2</sup> |
| Group 0-36 | 34                               | 2.839 <sup>1</sup> (3.810)       | 92 (112)                                 | 15-385 (17-440)                        | 0-36                         | 0 months-27.7 years              |

<sup>1</sup>In 4 studies [Mitani, Morris, Ramo, Terjesen], only the number of the hips (altogether 423) but not the patients were described in the investigated cohorts. The number of patients does not include these patients.

<sup>2</sup>20.8 years: age at final follow up



**Supplementary Table 4.** Potential risk factors for failure

| <b>Risk factor group</b> | <b>Number of potential risk factors (<math>\Sigma=71</math>)</b> | <b>Potential risk factors</b>                                                                                                                                                                                                                                                        |
|--------------------------|------------------------------------------------------------------|--------------------------------------------------------------------------------------------------------------------------------------------------------------------------------------------------------------------------------------------------------------------------------------|
| Gender                   | 2                                                                | male - female                                                                                                                                                                                                                                                                        |
| Age                      | 12                                                               | age at baseline exam, age at reduction, < 6 months, < 12 months, < 24 months, 6-12 months, 12-18 months, 18-24 months, 6-18 months, 12-24 months, 24-36 months, 6-24 months                                                                                                          |
| Anamnesis                | 4                                                                | positive family history, breech presentation, swaddling, other foot disease or torticollis                                                                                                                                                                                           |
| Previous treatment       | 6                                                                | preoperative traction – no traction, previous brace treatment – no brace treatment, traction time, length of orthotic treatment                                                                                                                                                      |
| Laterality               | 6                                                                | unilateral – bilateral, left – right, bilateral – unilateral failure in bilateral dislocation                                                                                                                                                                                        |
| Clinical exam            | 5                                                                | preoperative hip abduction, first visit irreducible – reducible, preoperative irreducible - reducible                                                                                                                                                                                |
| Ultrasound findings      | 7                                                                | less femoral head coverage, Harcke method, initial alfa angle - initial beta angle, Graf IIc, III, IV                                                                                                                                                                                |
| X-ray finding            | 14                                                               | Tönnis grade II, III, IV<br>IHDI grade II, III, IV<br>FAZ zone I, II, III<br>Grade II (mild), Grade III (severe)<br>ossific nucleus present – absent, acetabular index                                                                                                               |
| Soft tissue release      | 2                                                                | adductor tenotomy<br>psoas release                                                                                                                                                                                                                                                   |
| Arthrogram findings      | 11                                                               | delineation of the labrum or acetabular surface at arthrogram, medial dye pool (MDP) distance/width of pool contrast, obstructive limbus, shape of limbus, cone stability, Tönnis grade, reduction grade, stability grade, medialization ratio, acetabular coverage, inverted labrum |
| Cast application         | 1                                                                | length of postreduction spica casting                                                                                                                                                                                                                                                |
| Walking                  | 1                                                                | walking ability                                                                                                                                                                                                                                                                      |
