# Supplementary figures and images for: Rates and risk factors for failure of reduction in closed reduction in developmental dysplasia of the hip: a systematic review and meta-analysis
Source: PubMed Central journal article supplement — EFORT Open Rev. 2024 Sep 2;9(9):908–22. doi: 10.1530/EOR-24-0007 (PMC11457818; doi:10.1530/eor-24-0007), 2024-09-02

## RISK FACTORS – OVERALL (GROUP 0-24)

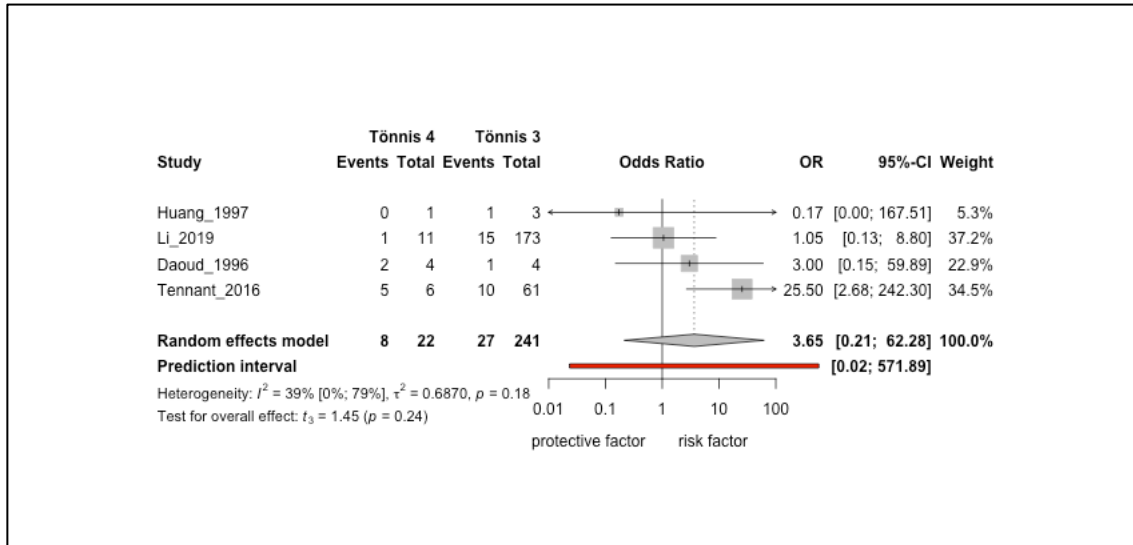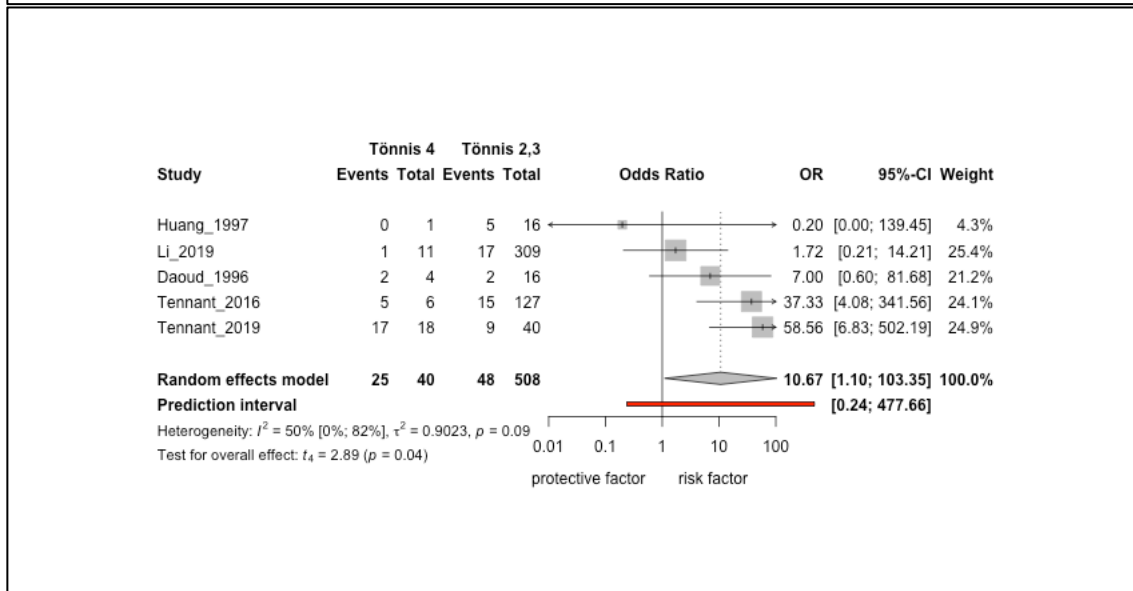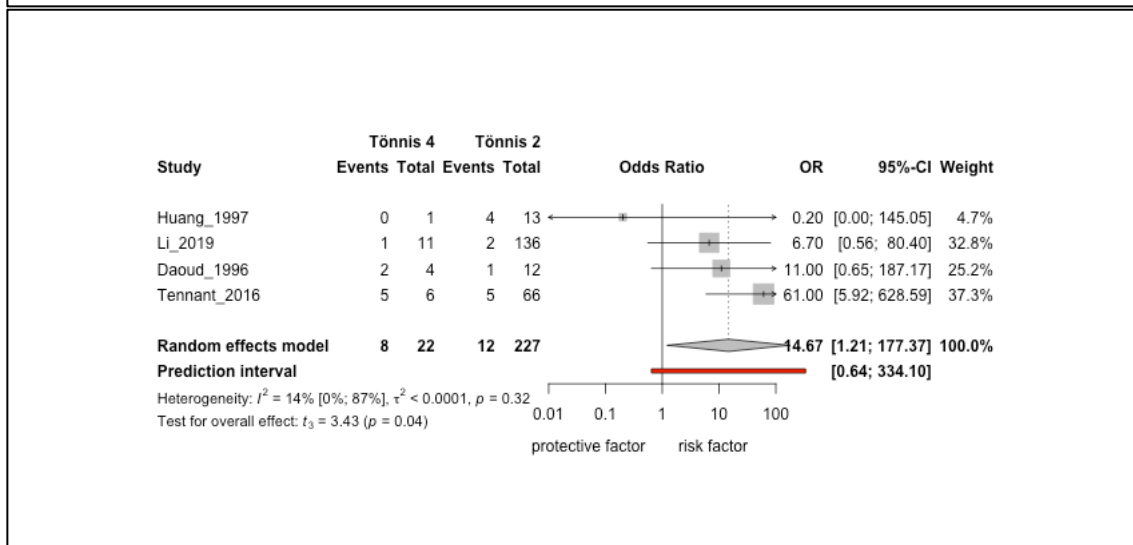

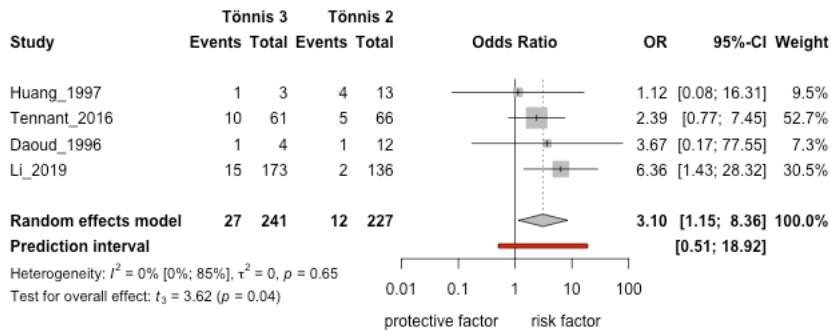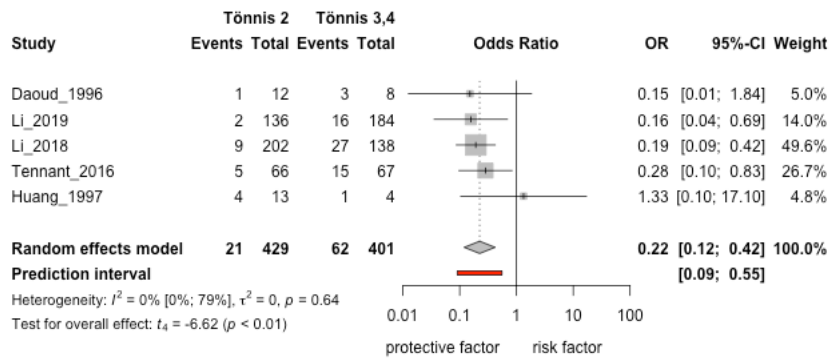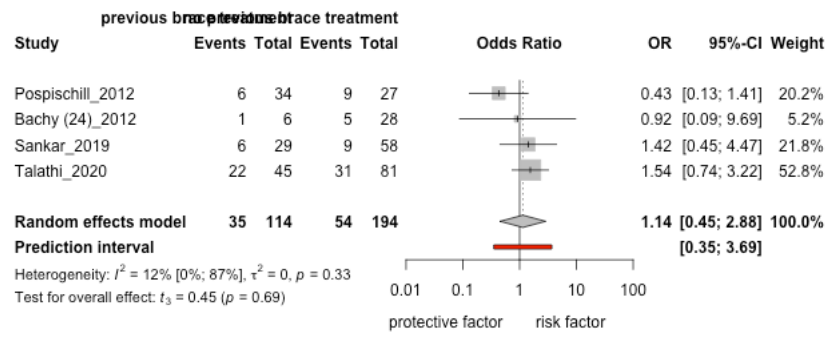

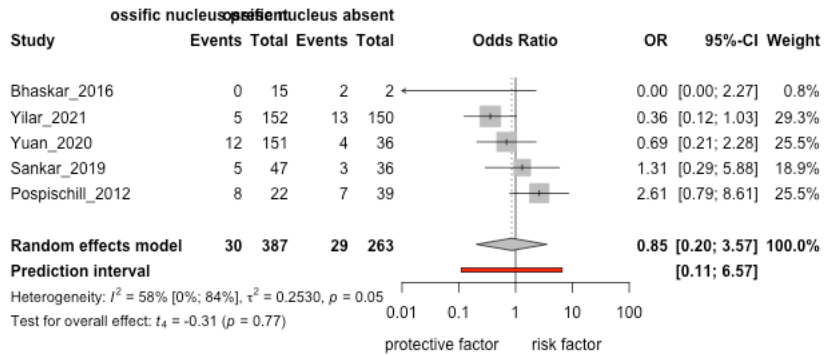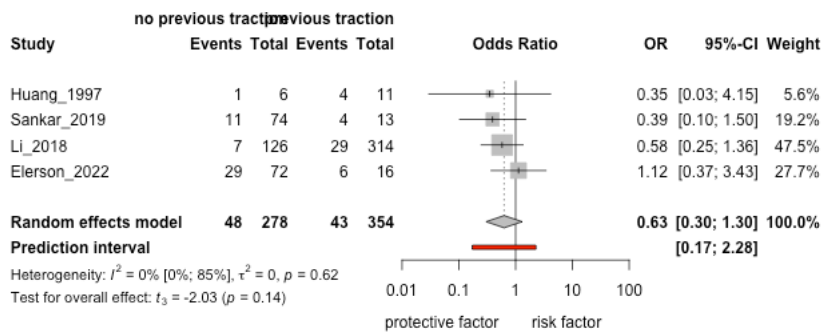

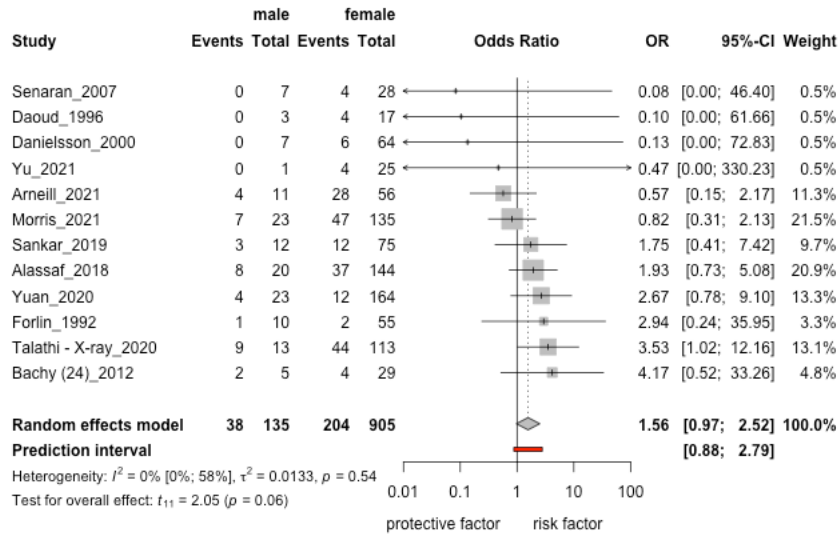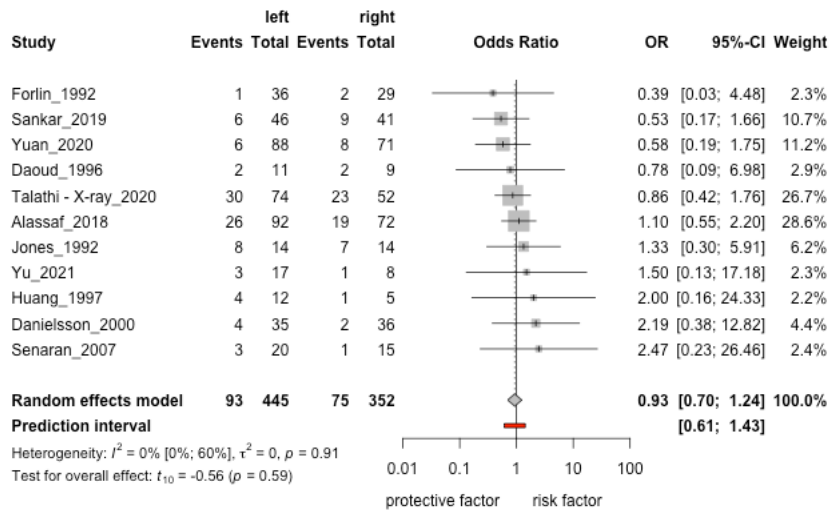

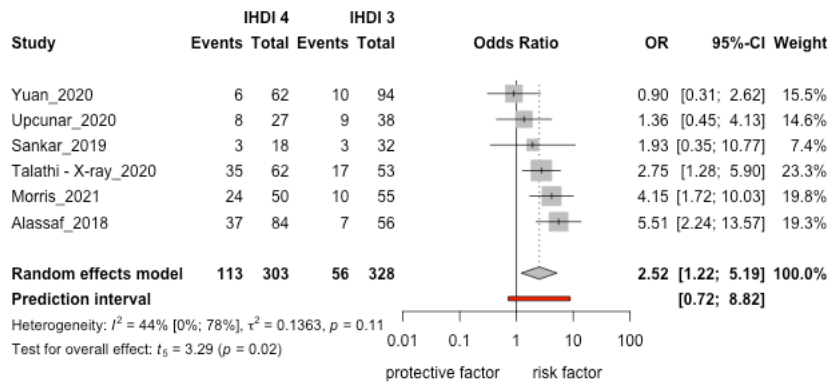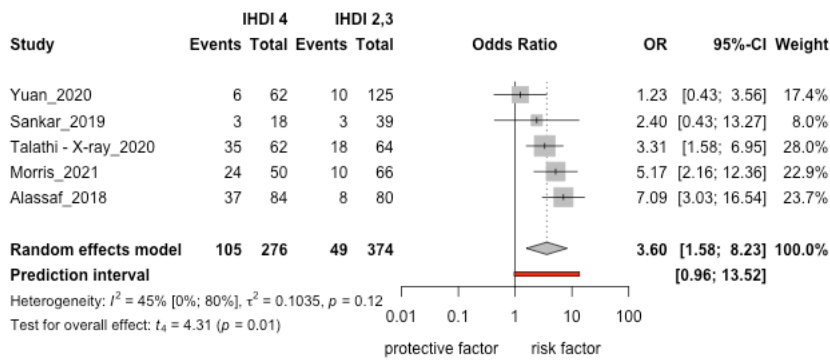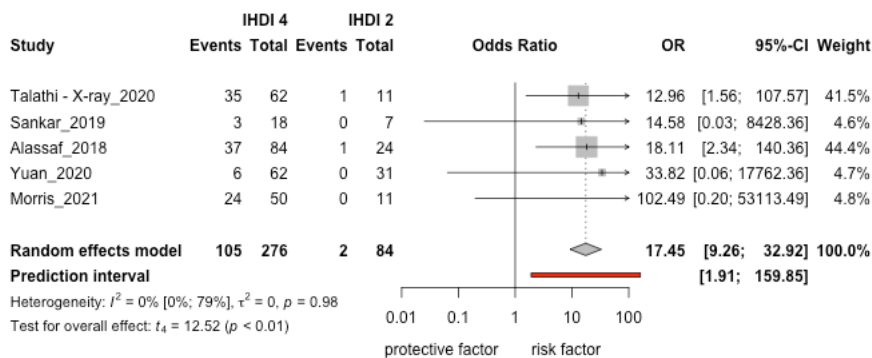

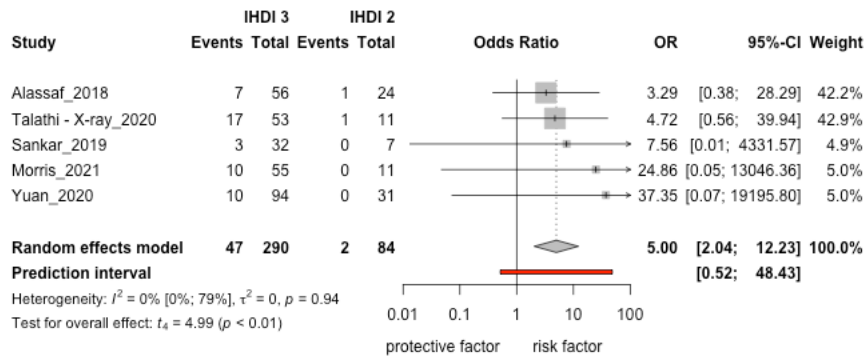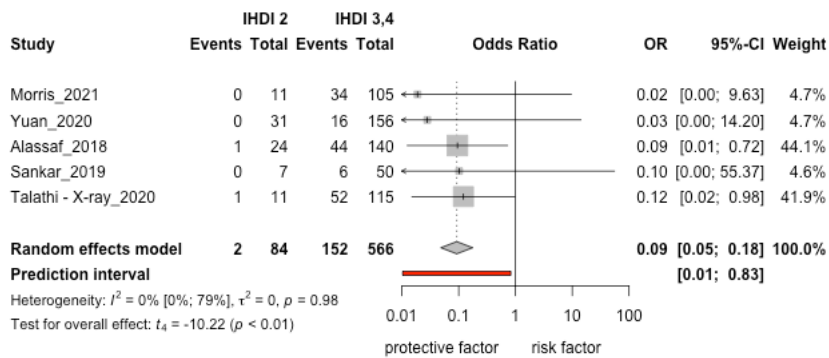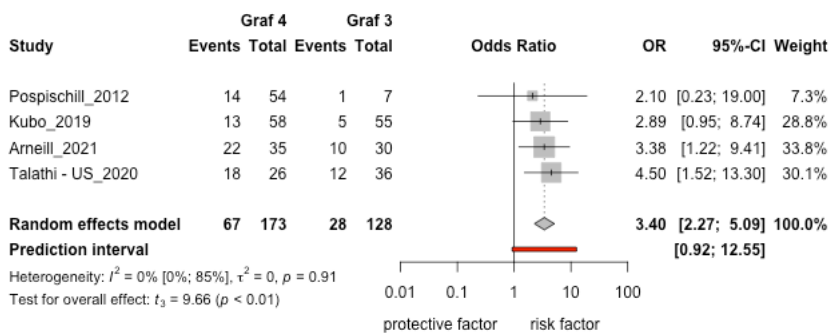

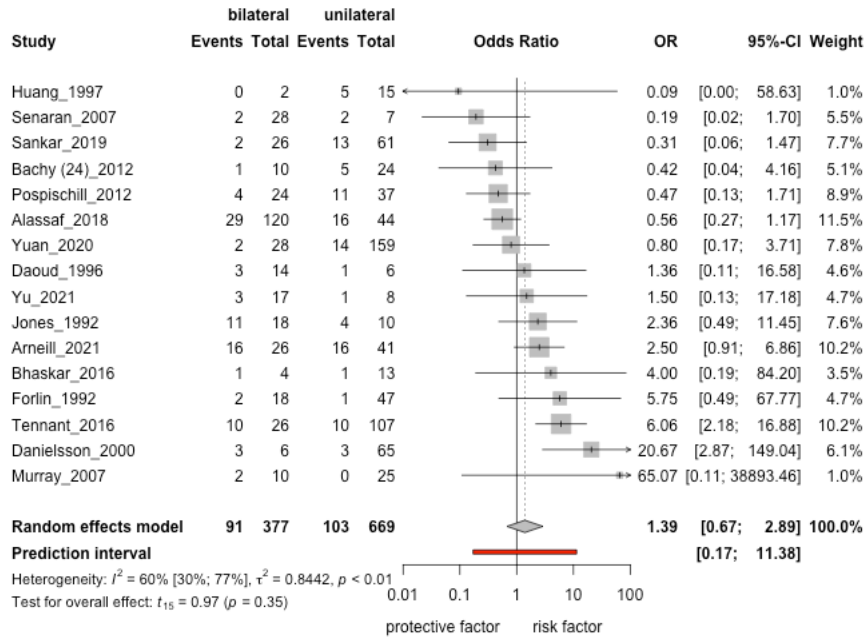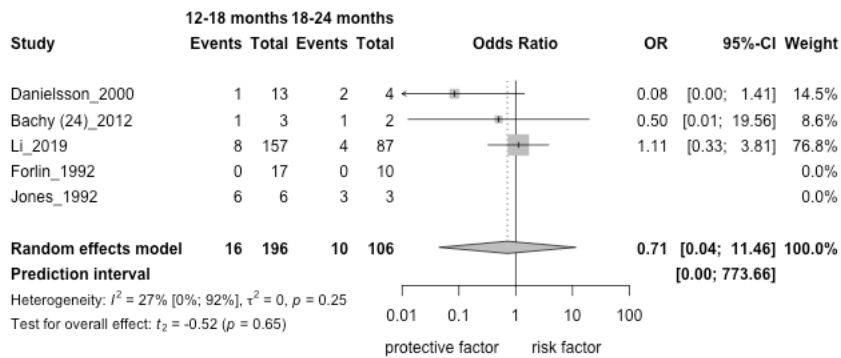

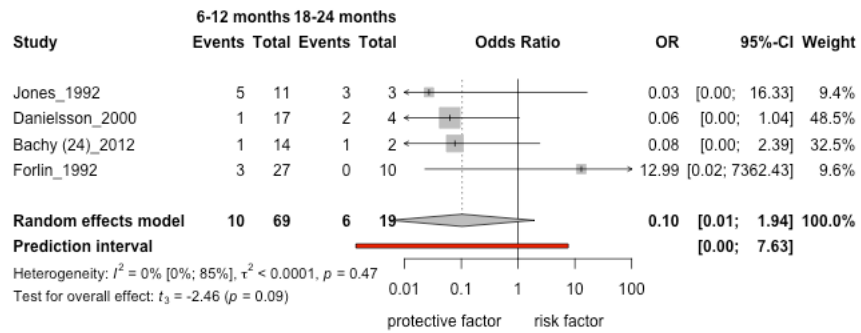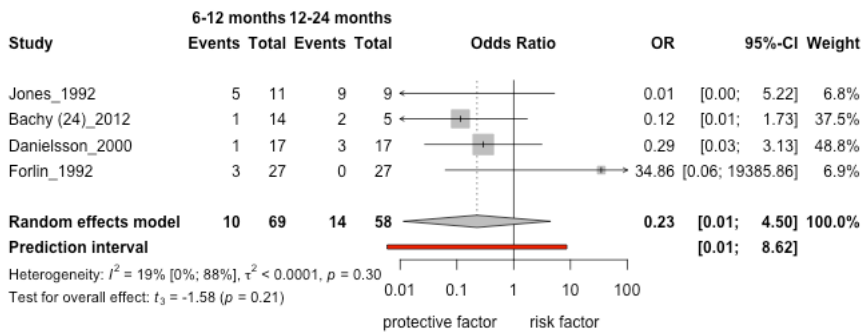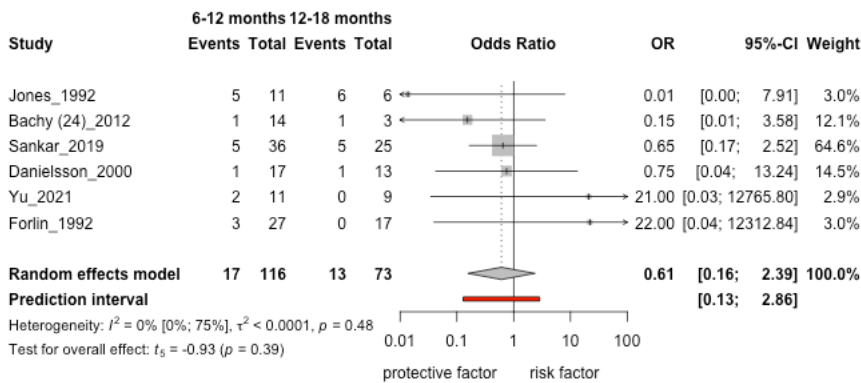



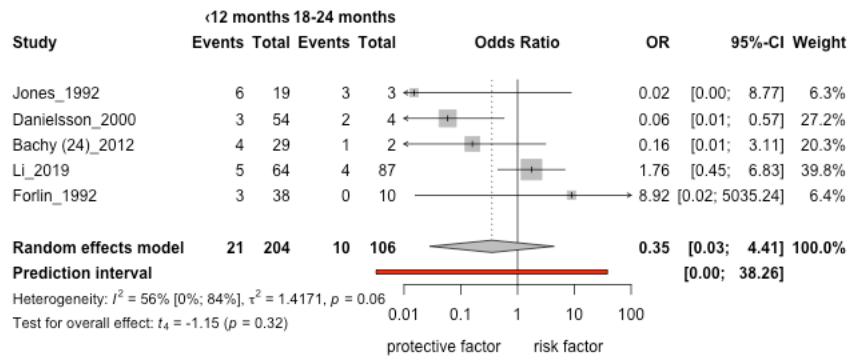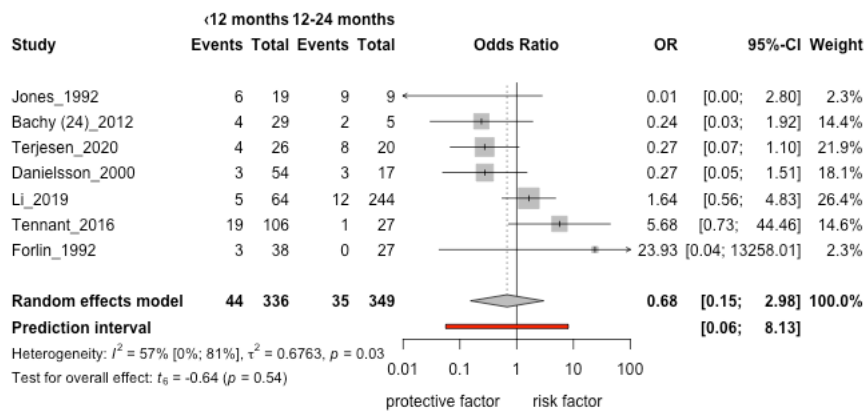

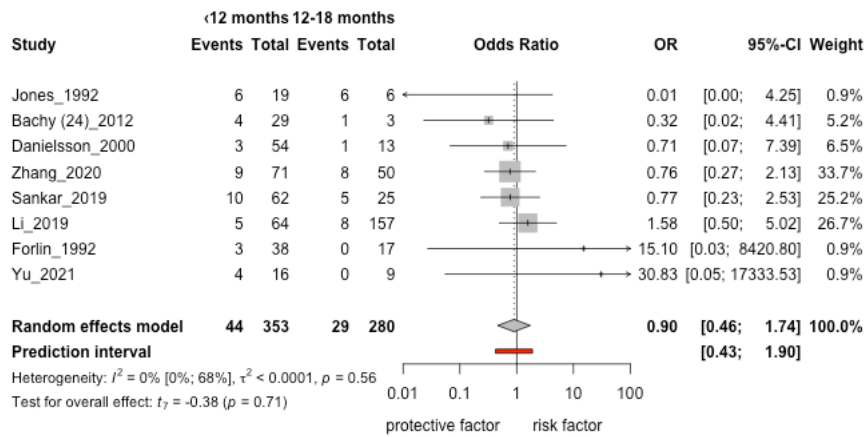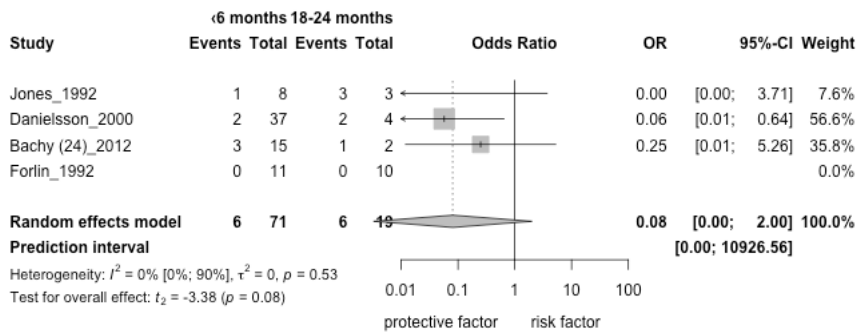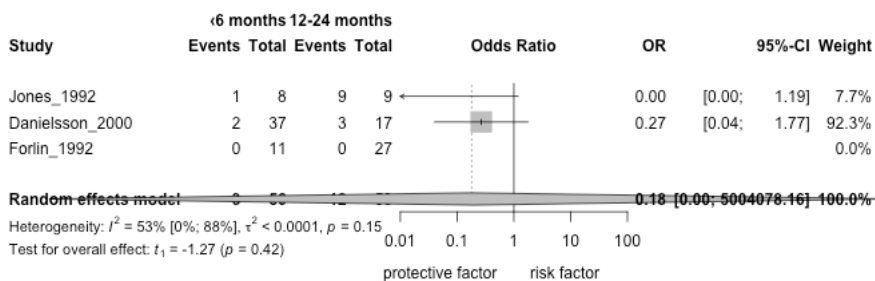

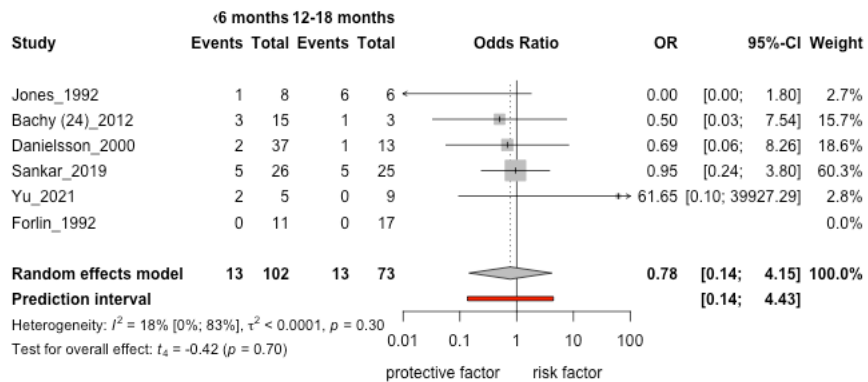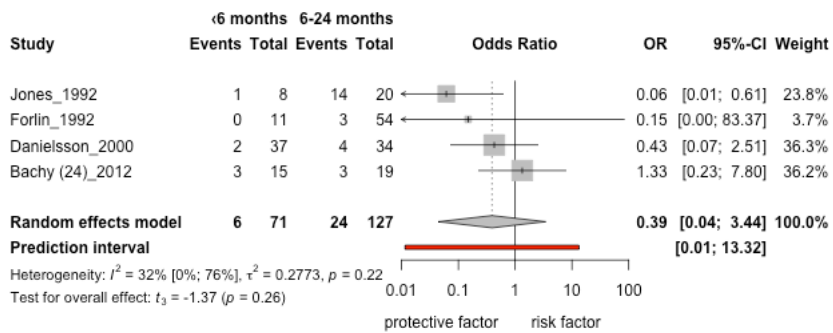

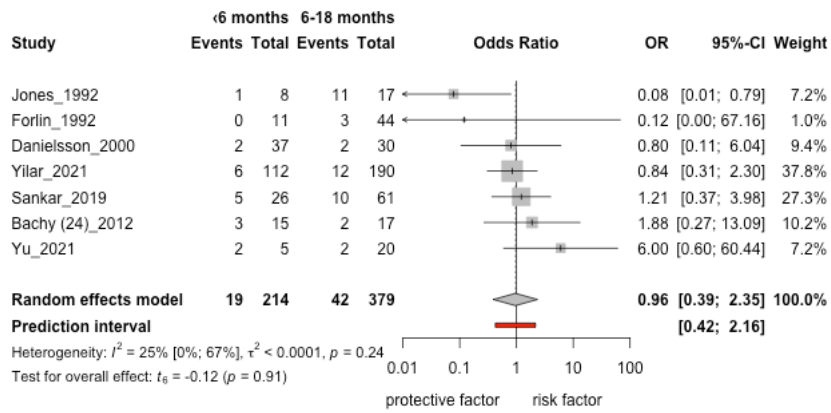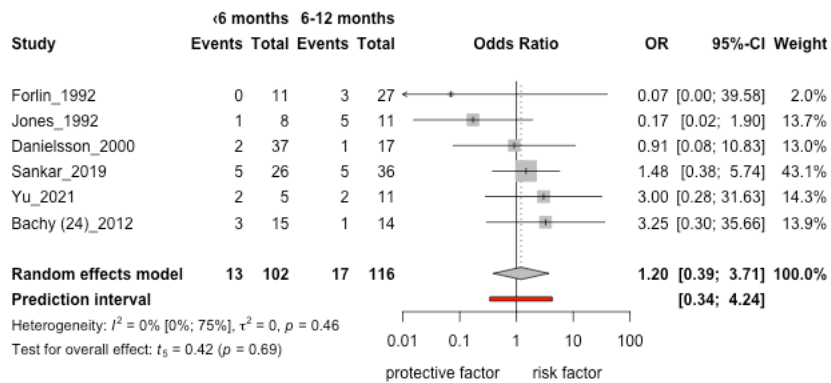

Supplement: EOR-24-0007supplementary_figure_1.pdf [file EOR-24-0007supplementary_figure_1.pdf]

## FAILURE RATES IN DIFFERENT TREATMENT STEPS (GROUP 0-36)

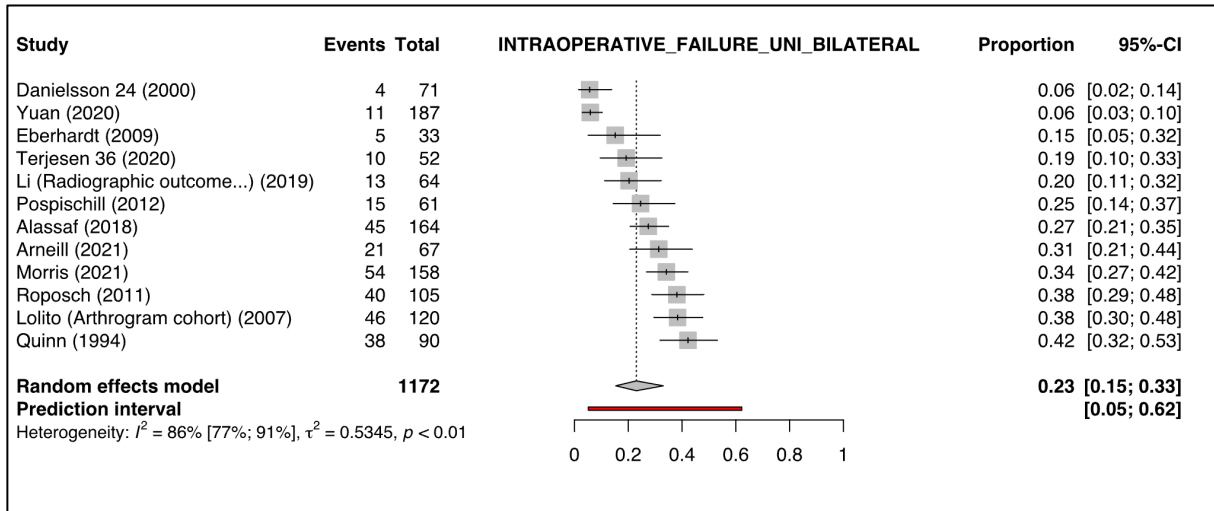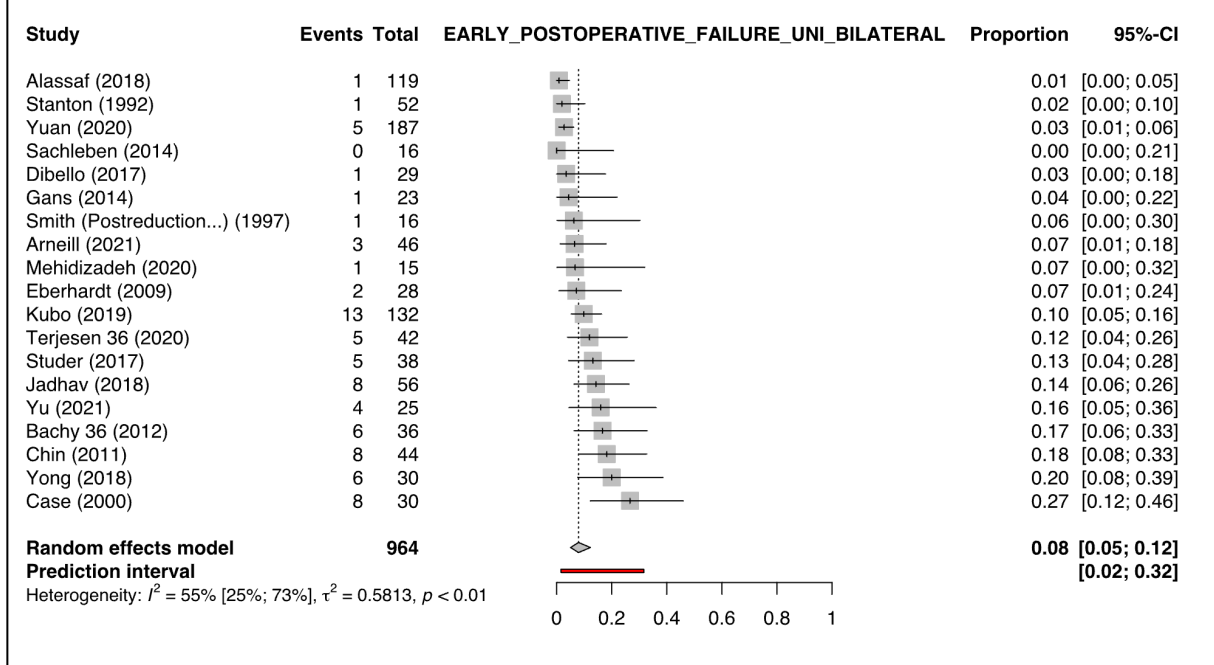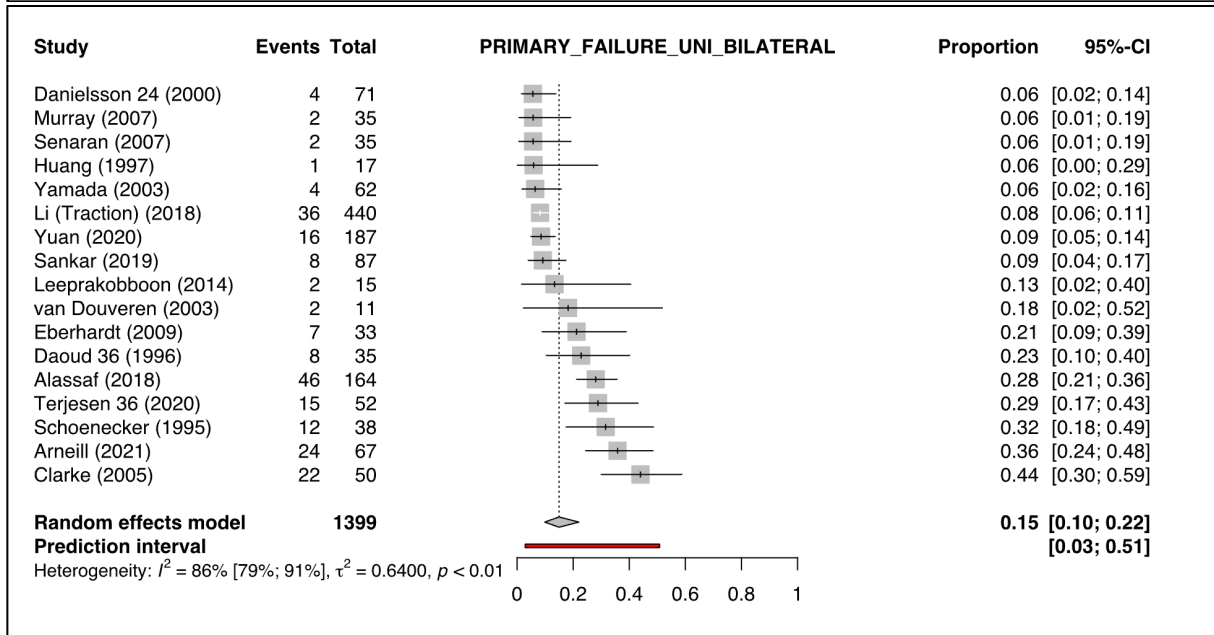

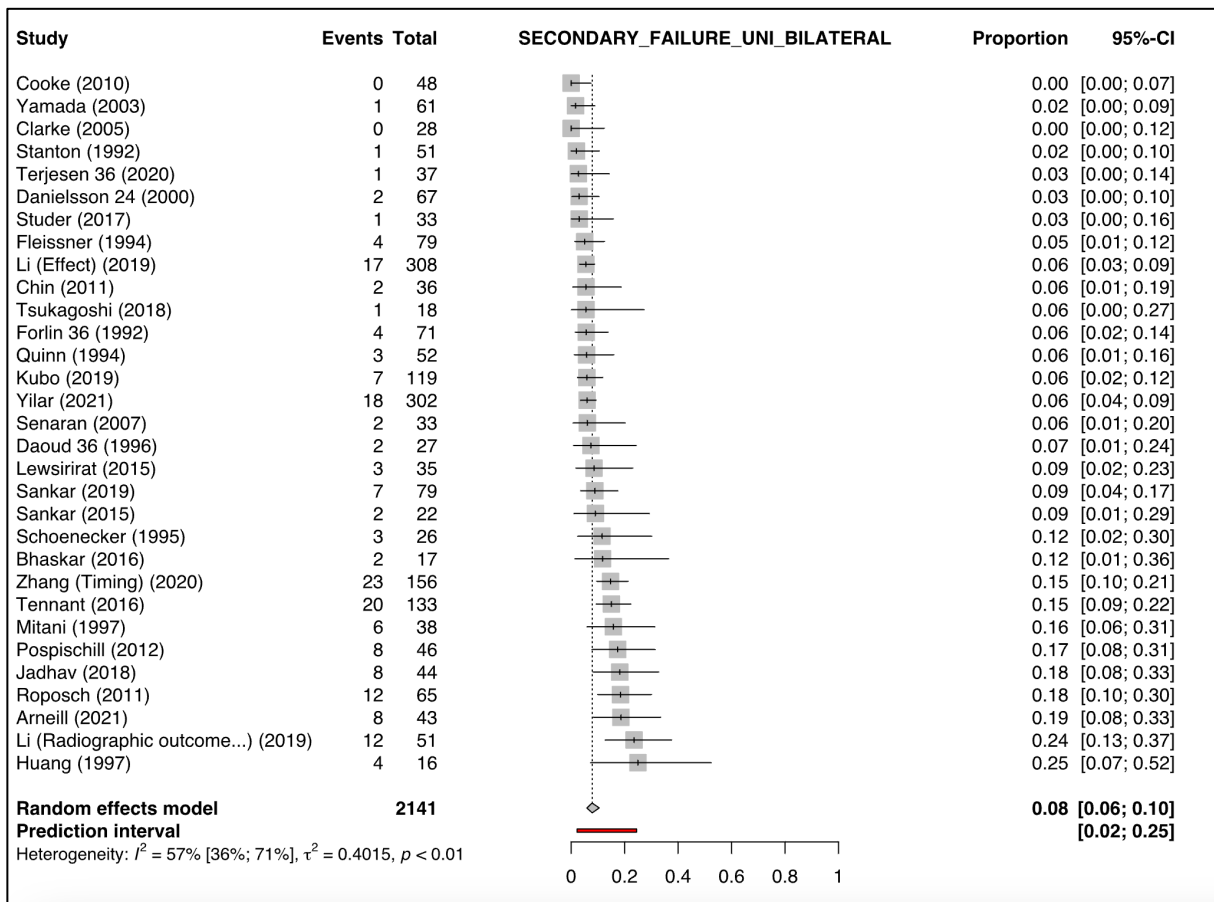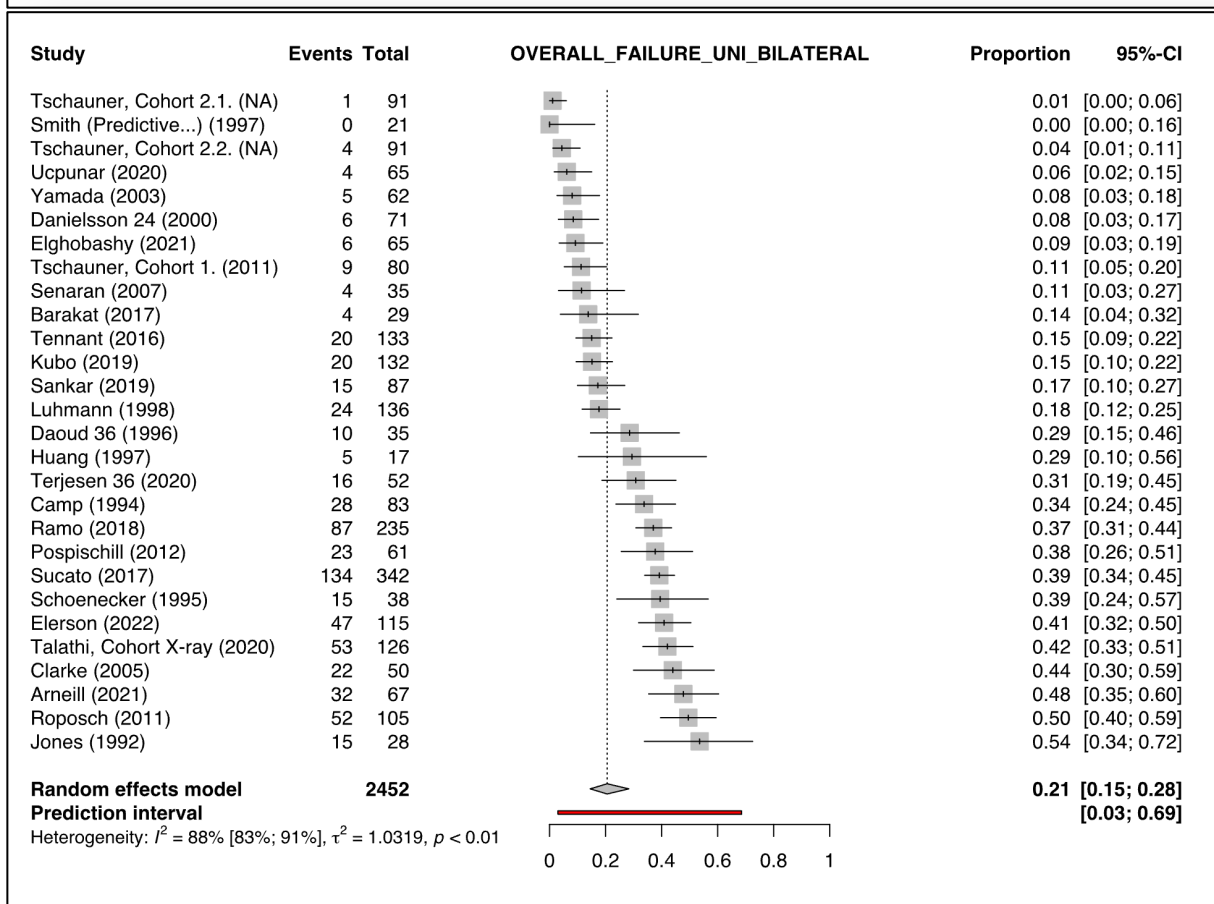

Supplement: EOR-24-0007supplementary_figure_10.pdf [file EOR-24-0007supplementary_figure_10.pdf]

## FAILURE RATES IN DIFFERENT CLASSIFICATIONS (GROUP 0-24)

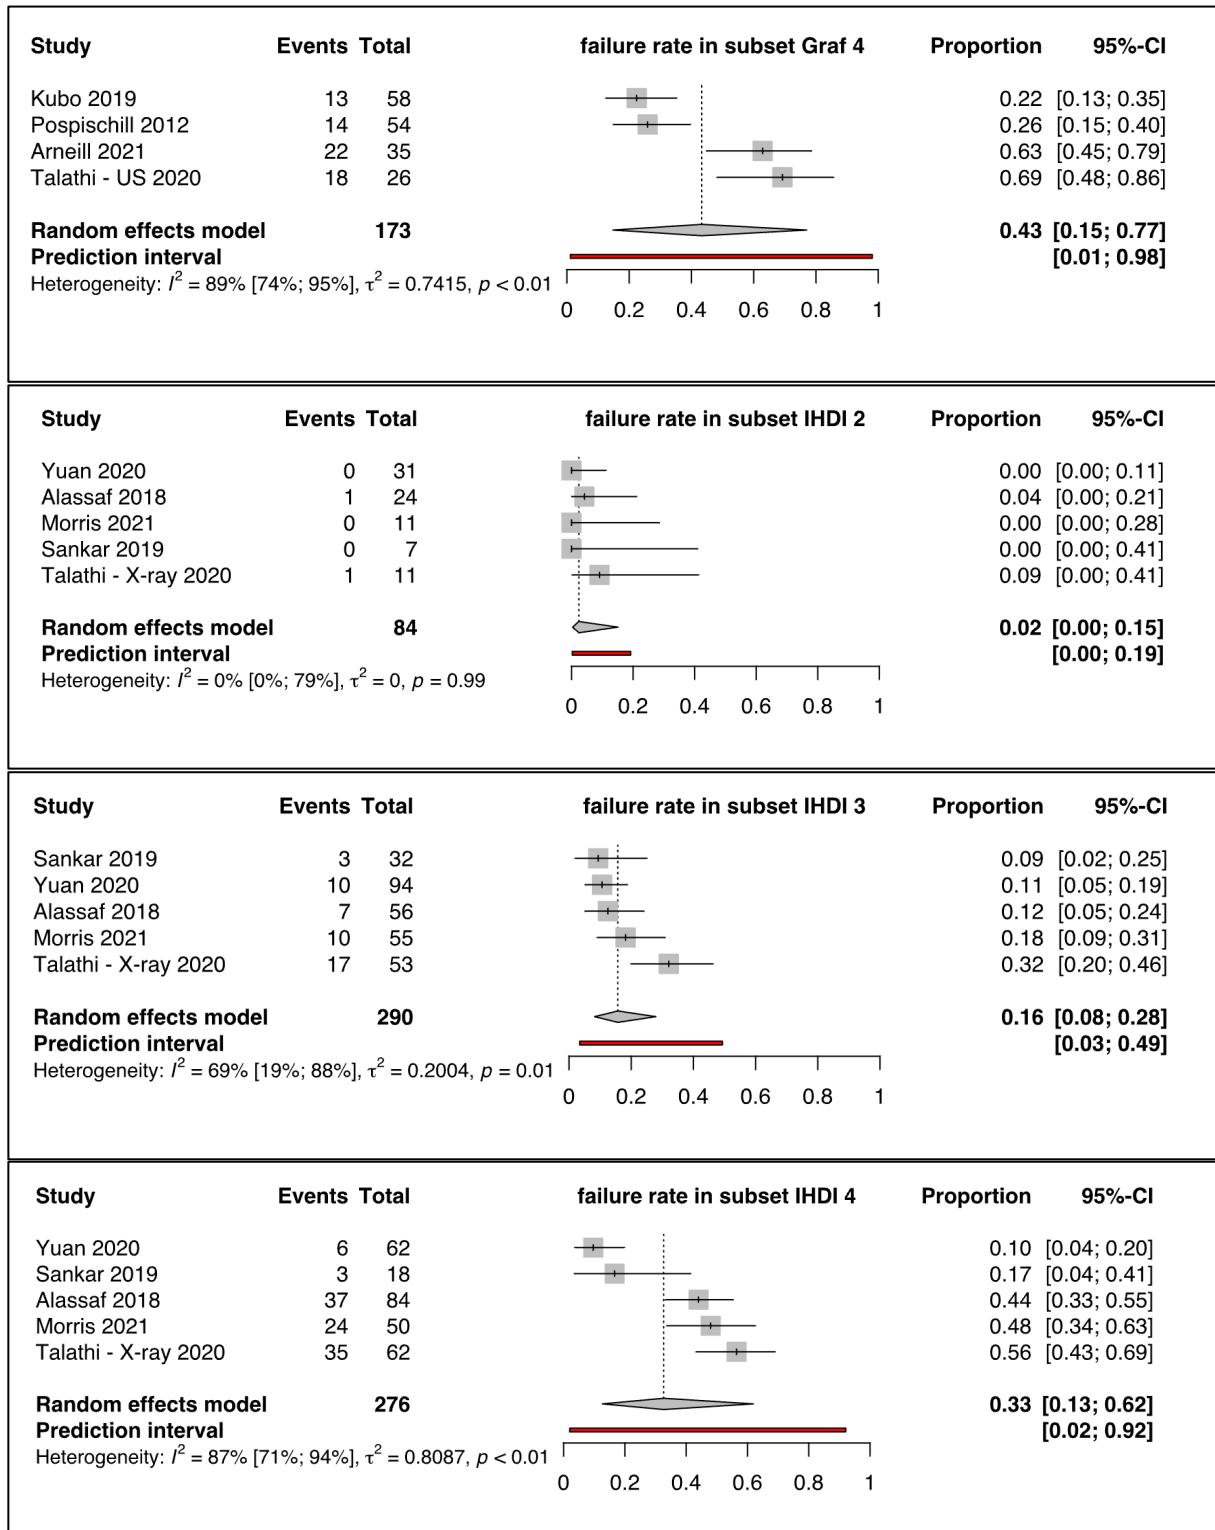

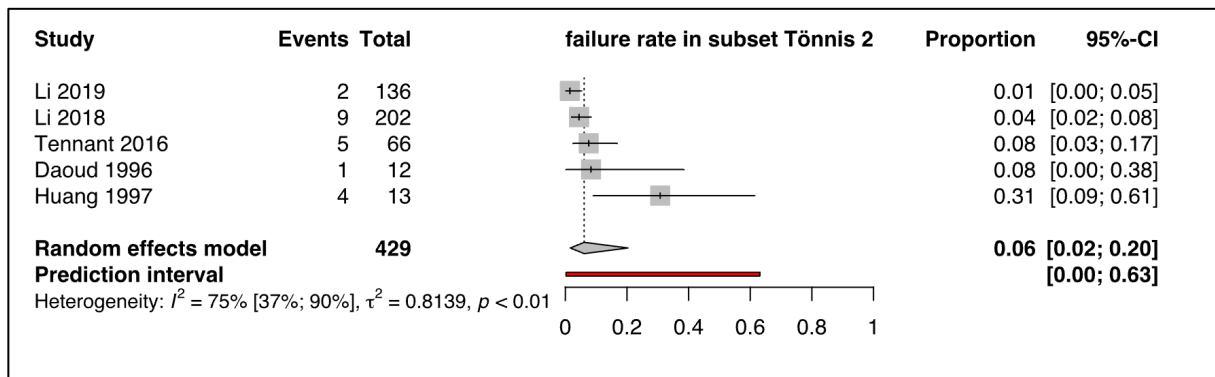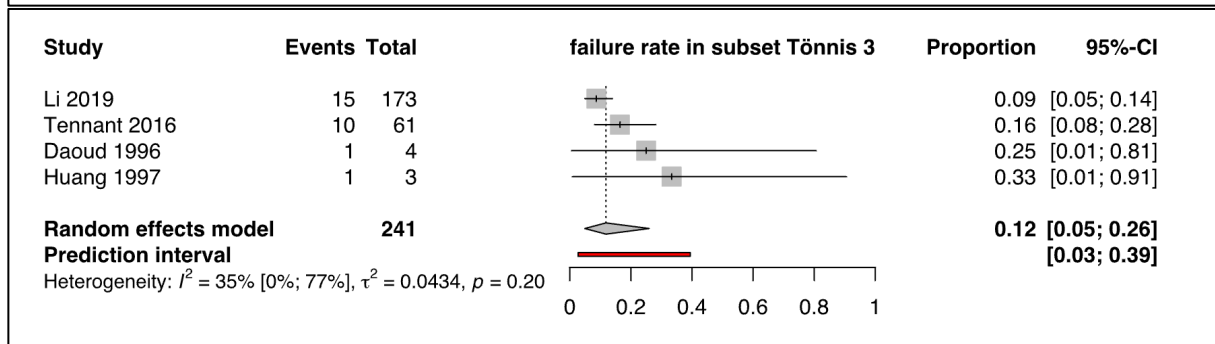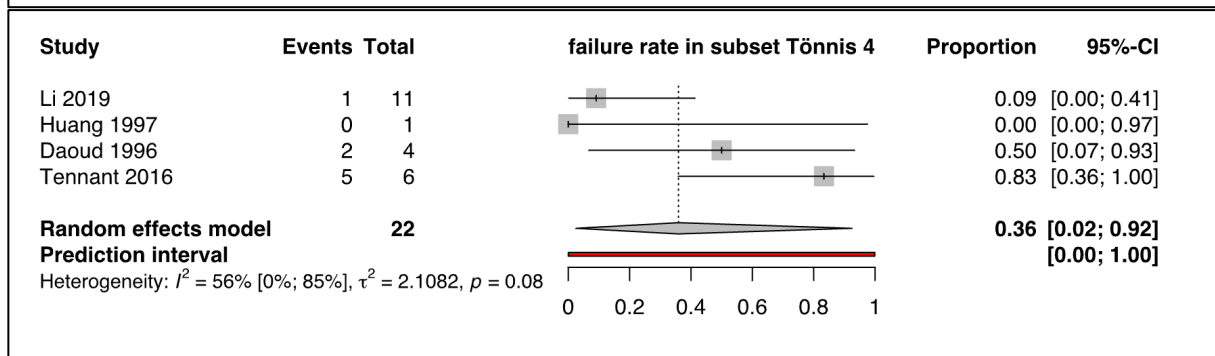

Supplement: EOR-24-0007supplementary_figure_11.pdf [file EOR-24-0007supplementary_figure_11.pdf]

## RISK FACTORS – OVERALL (GROUP 0-36)

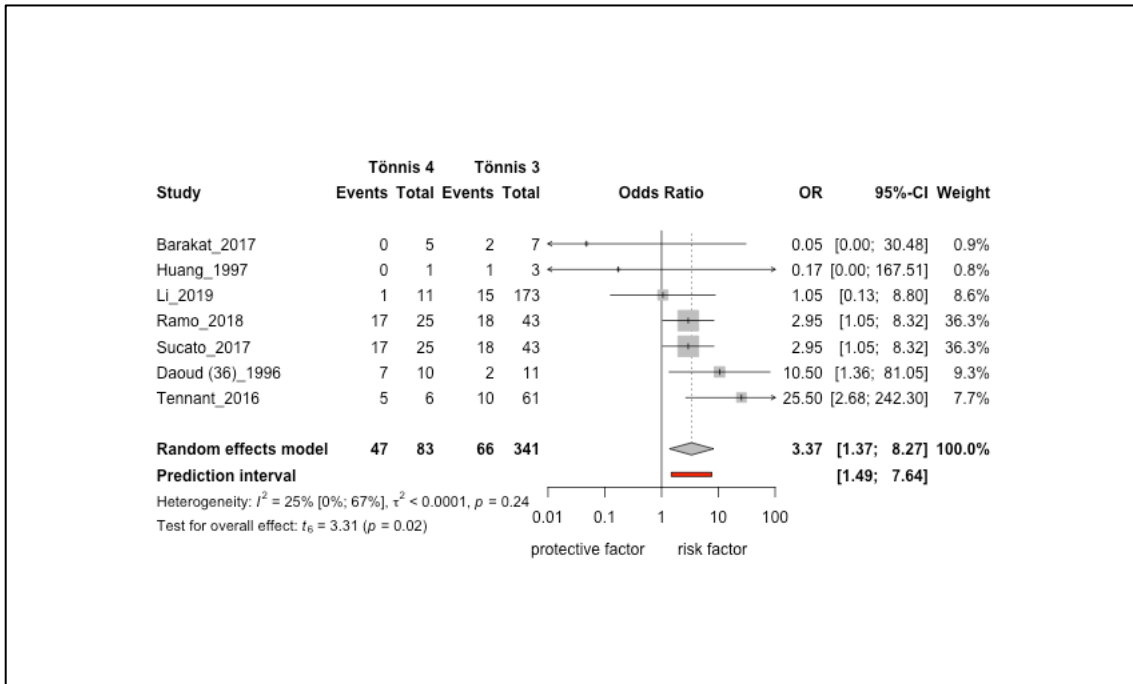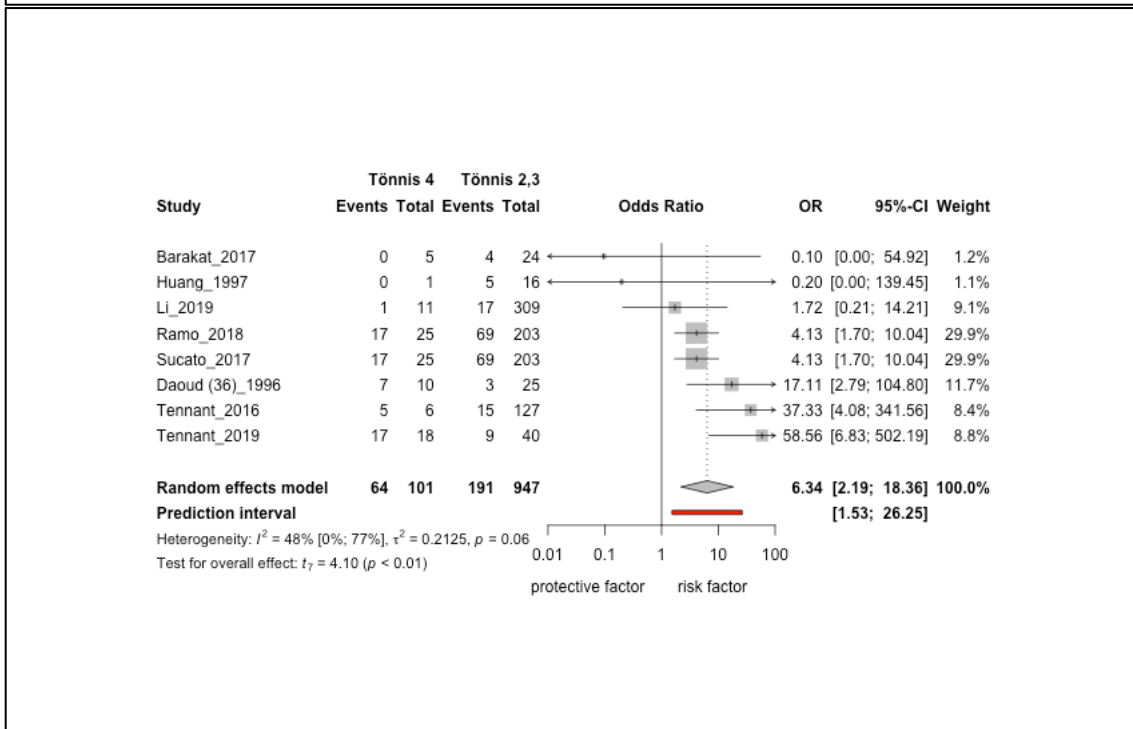

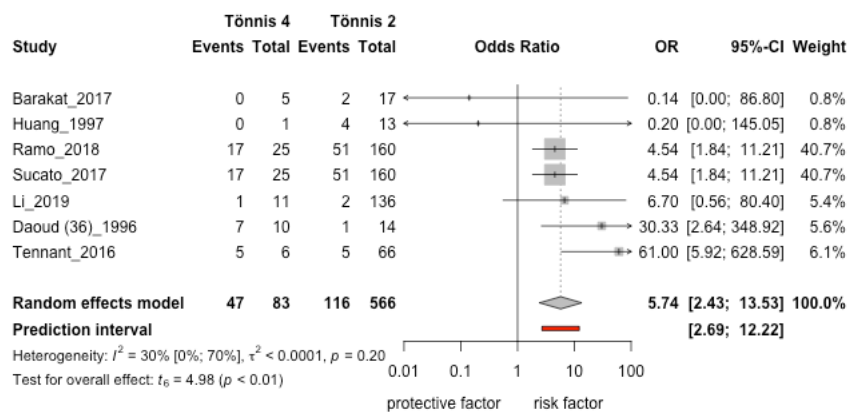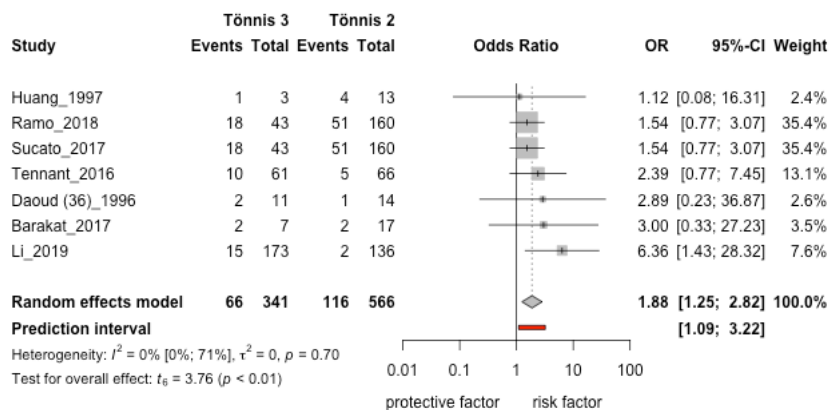

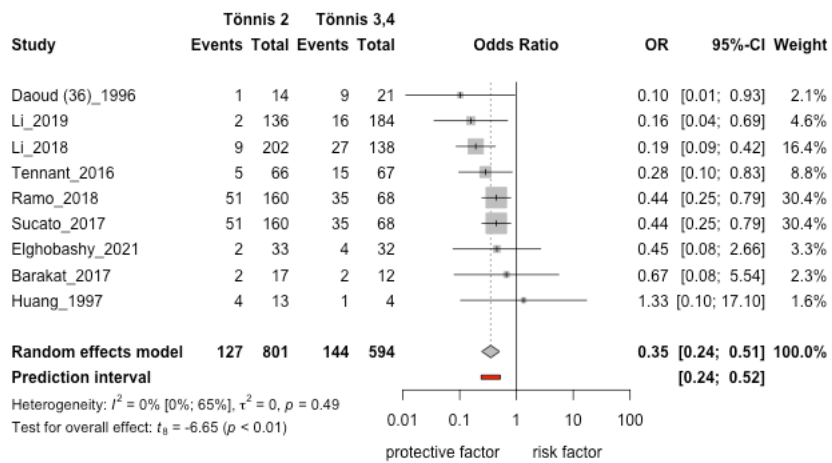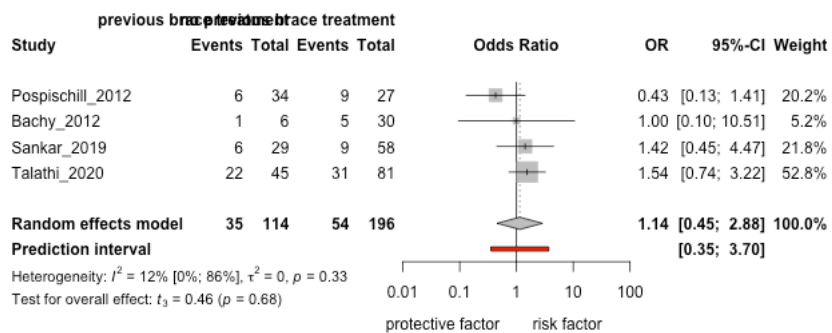

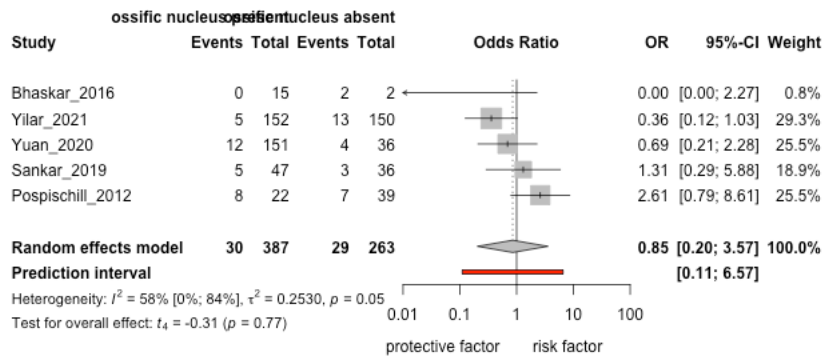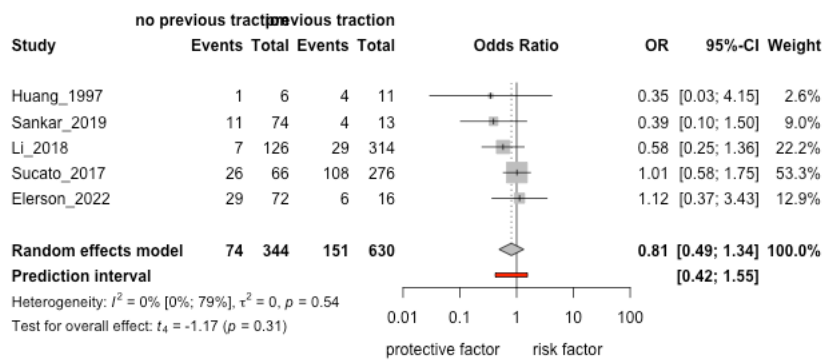

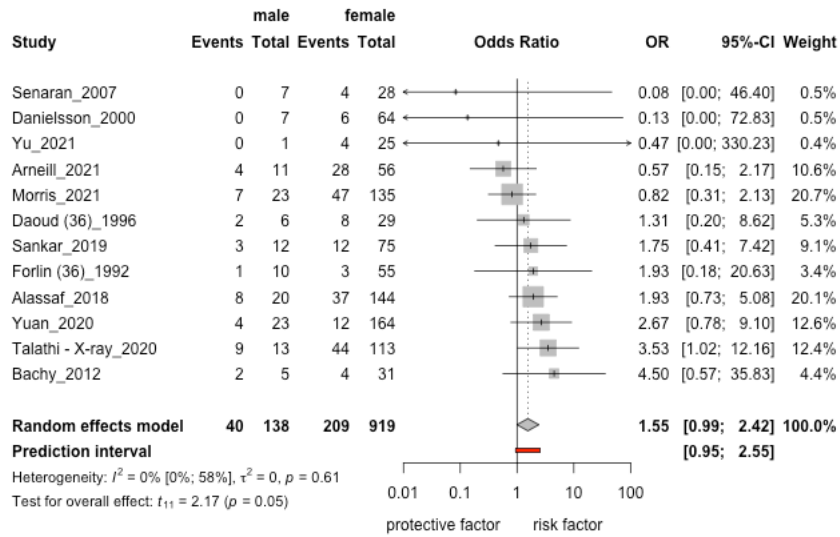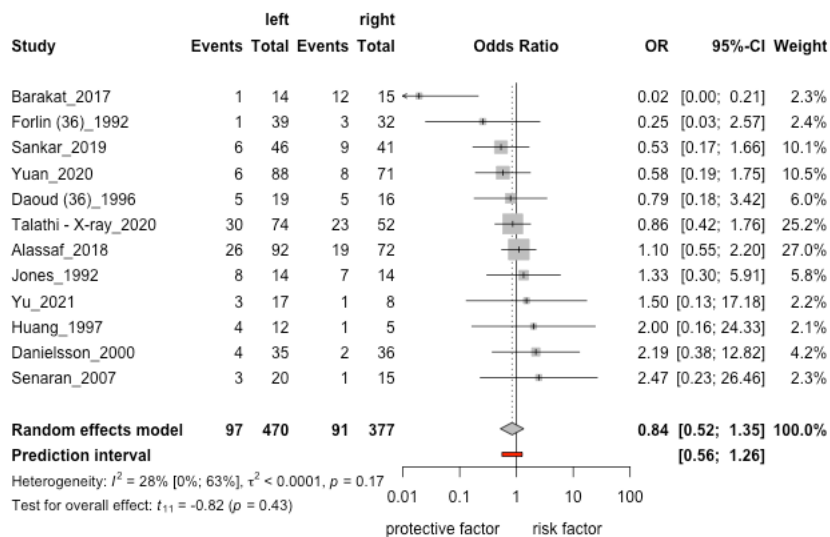

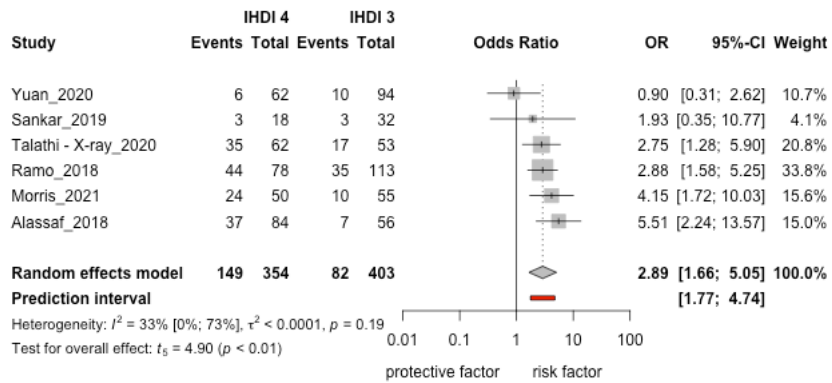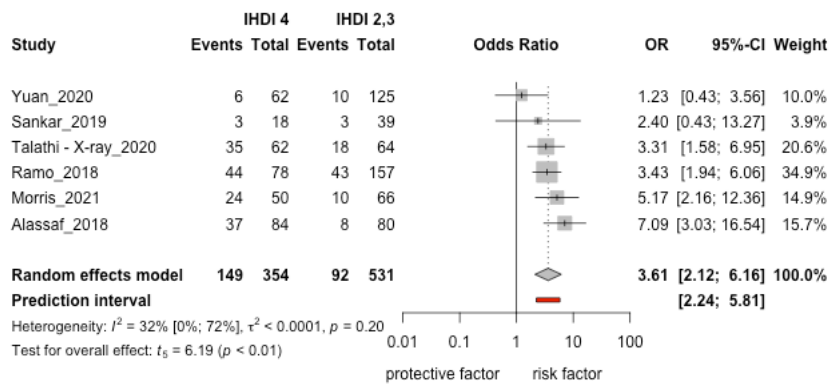

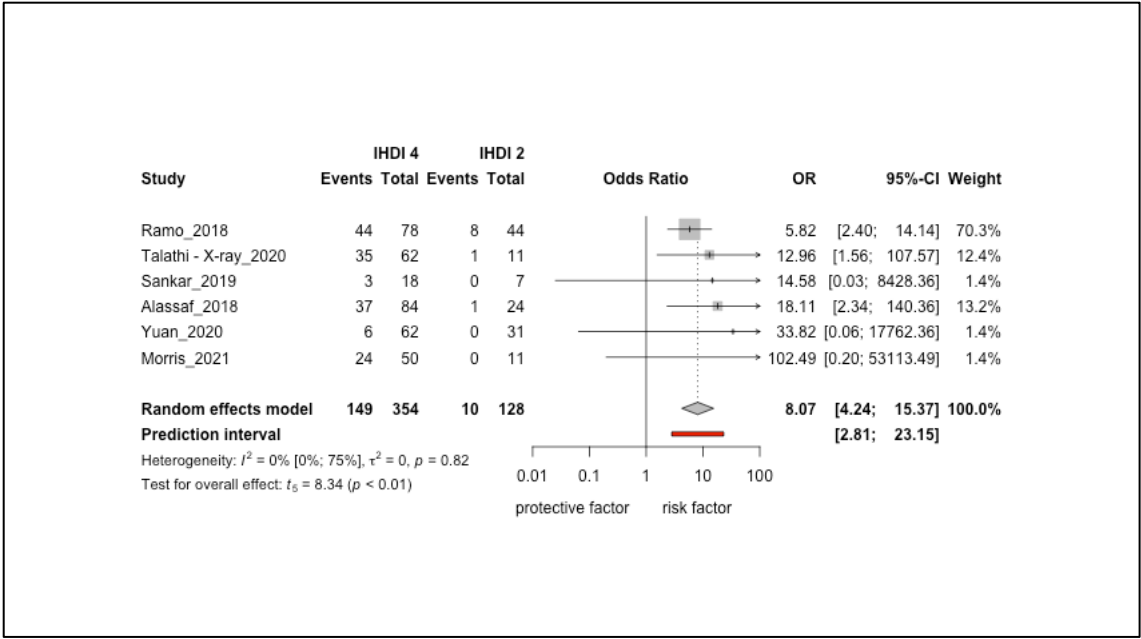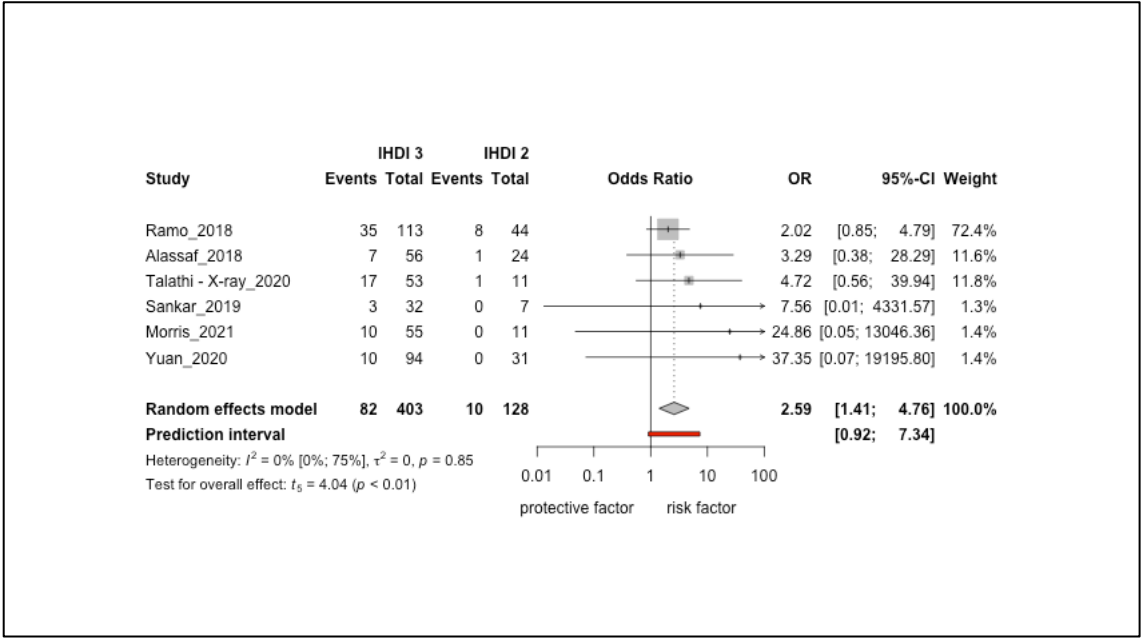

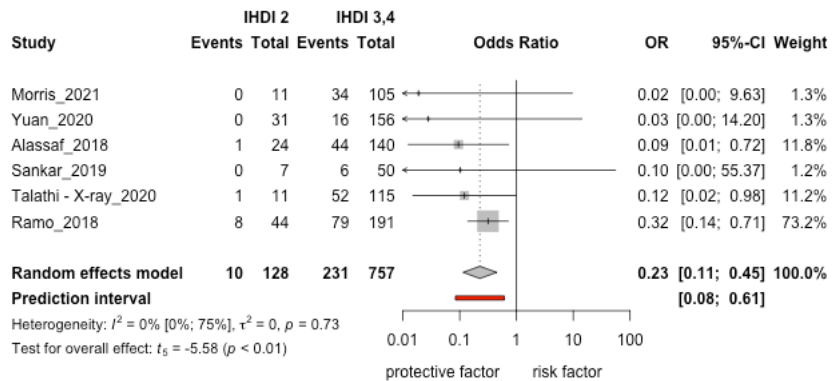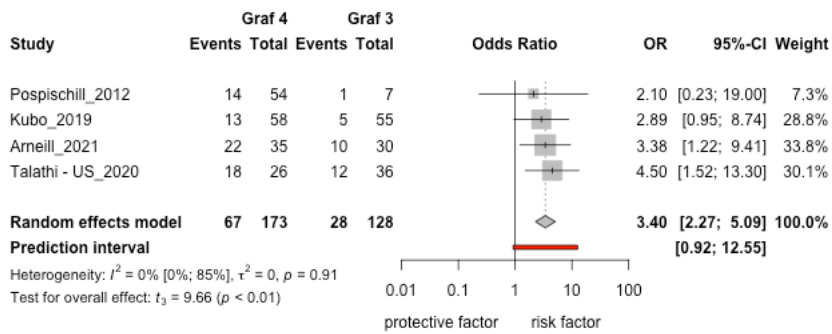



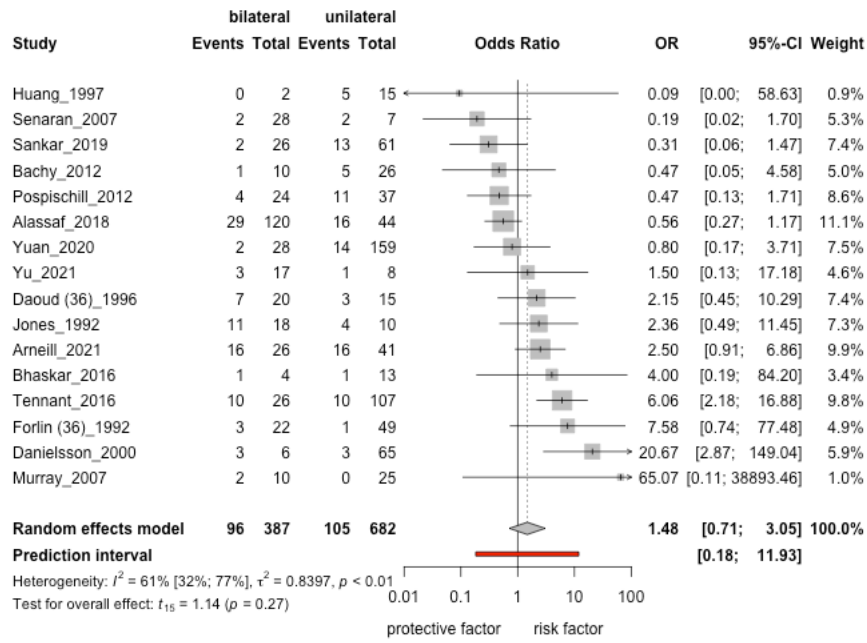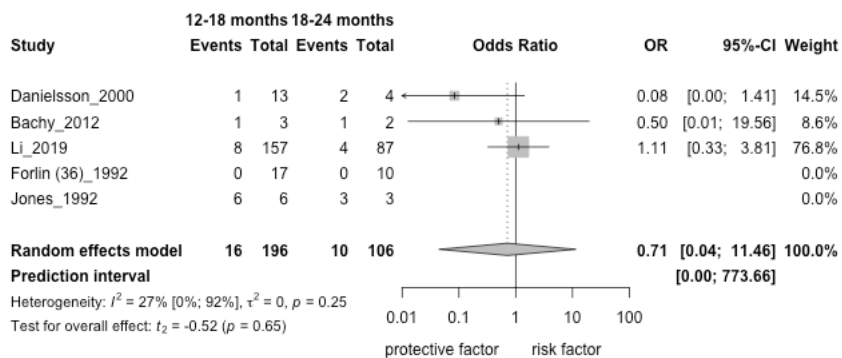

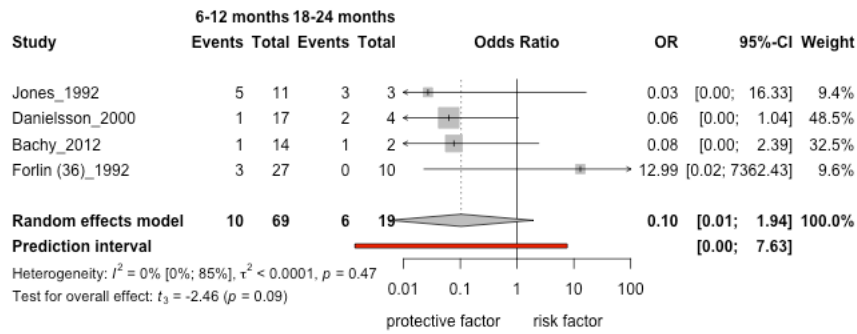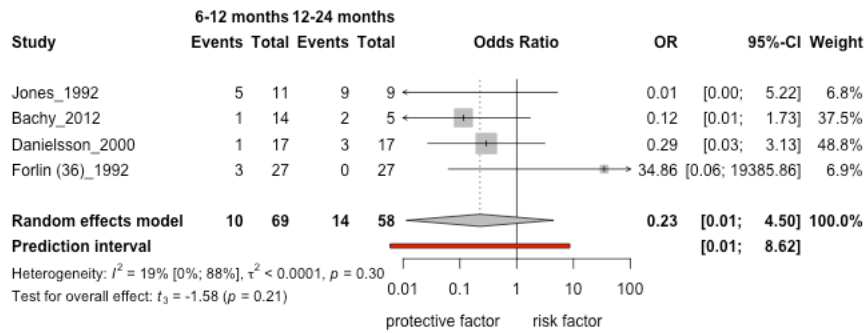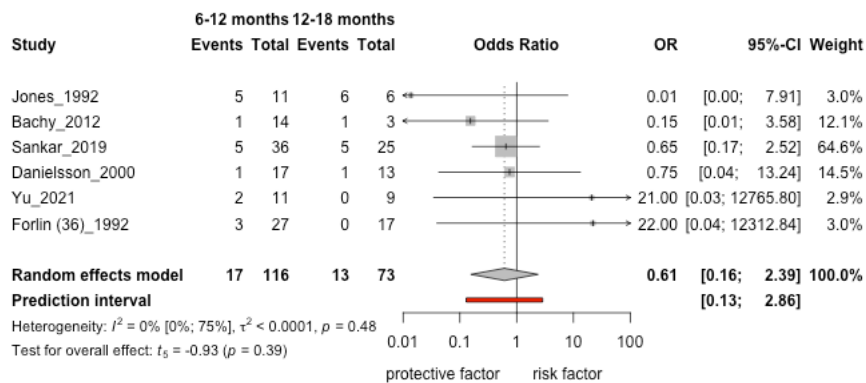

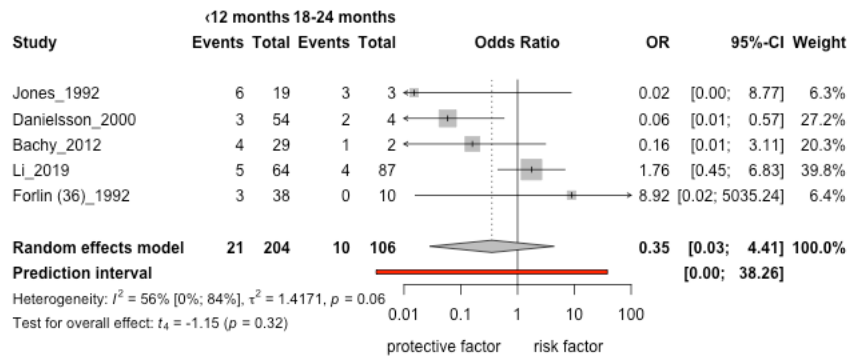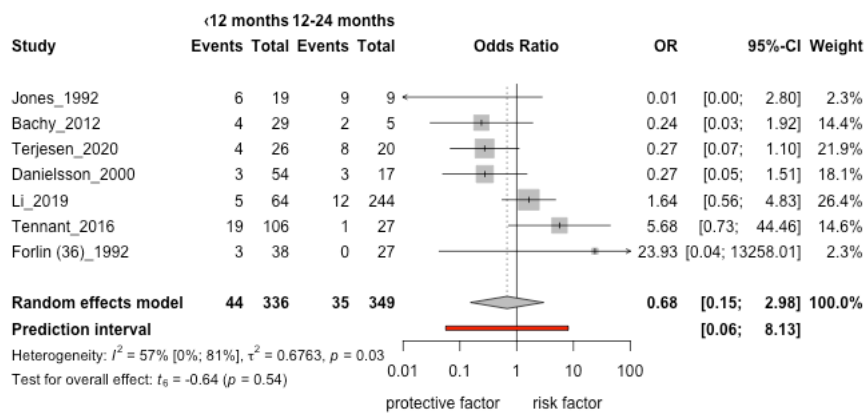

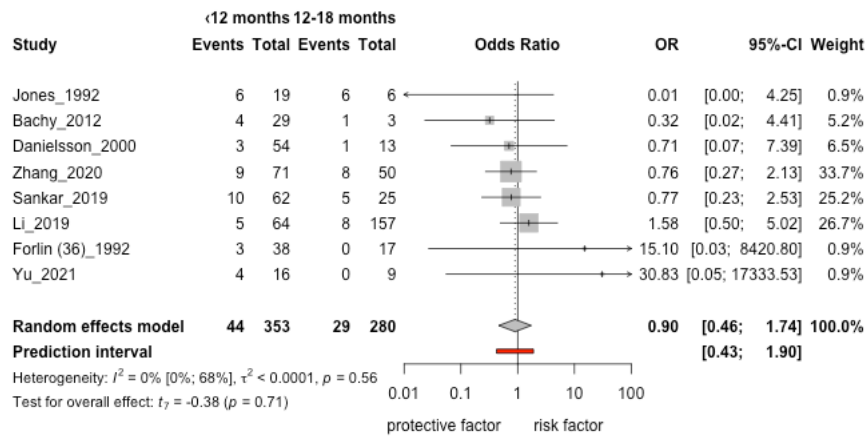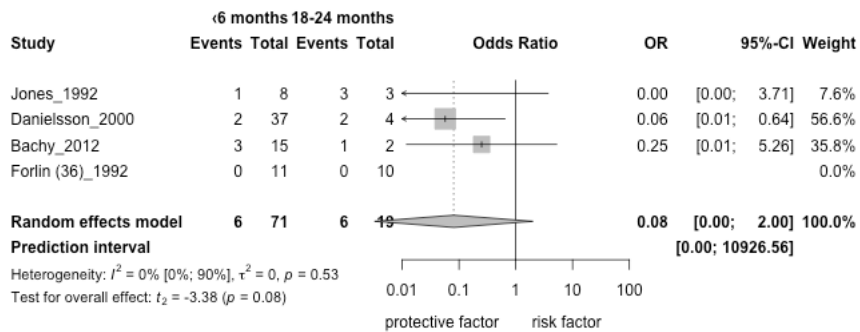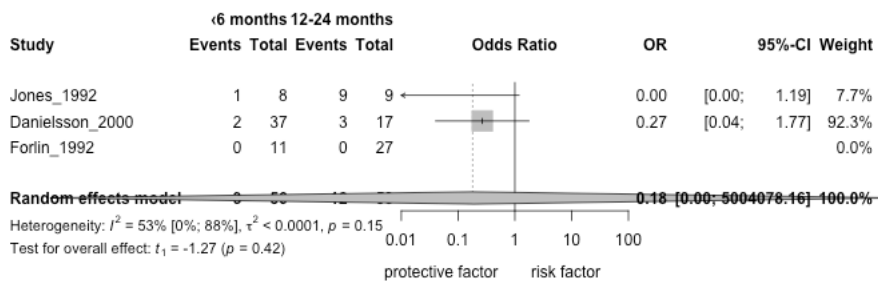

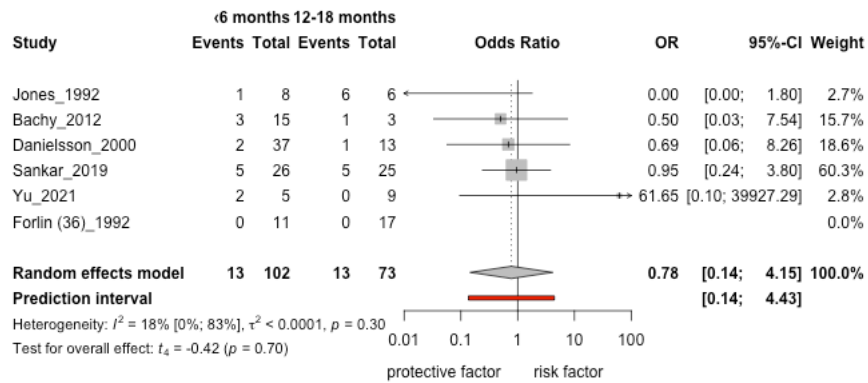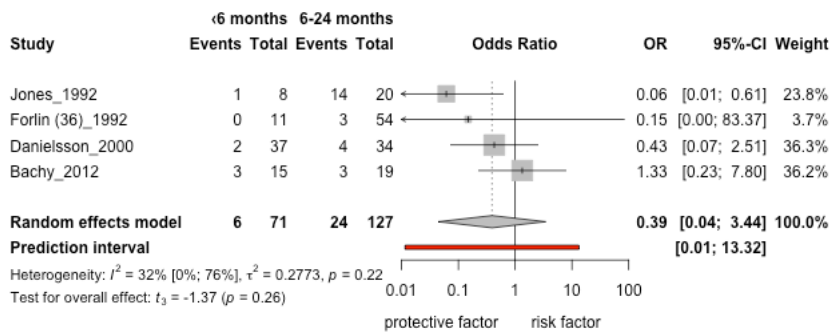

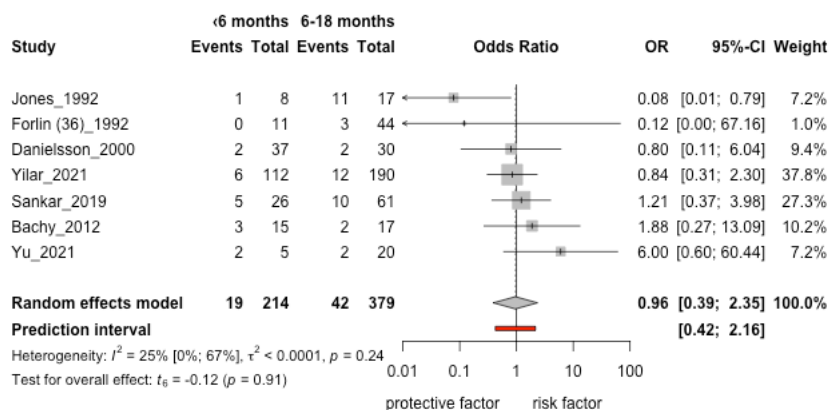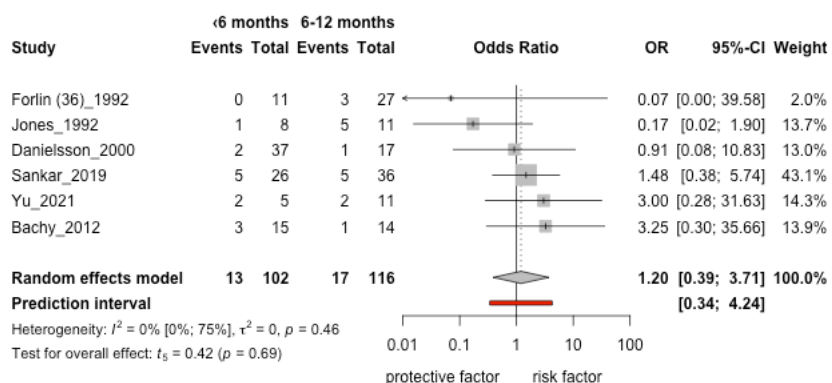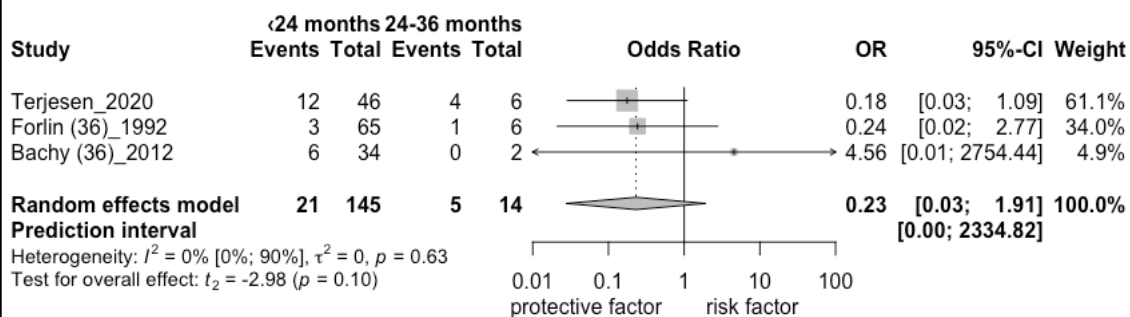

Supplement: EOR-24-0007supplementary_figure_12.pdf [file EOR-24-0007supplementary_figure_12.pdf]

## FAILURE RATES IN DIFFERENT CLASSIFICATIONS (GROUP 0-36)

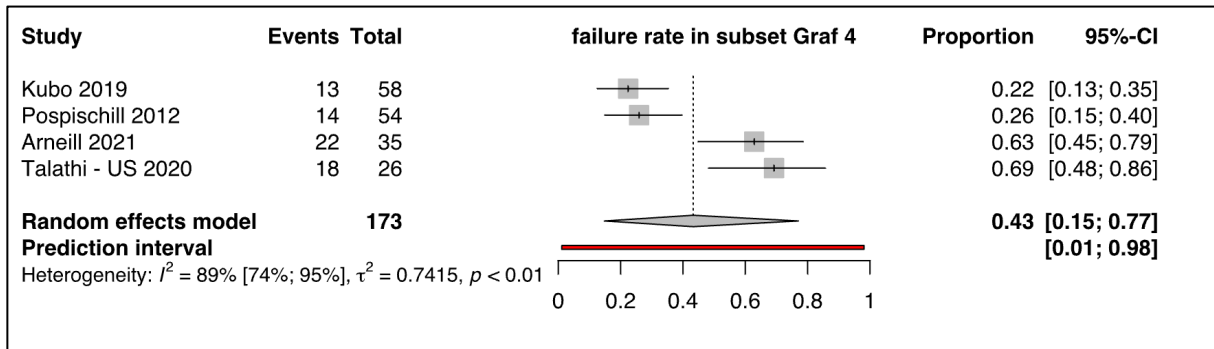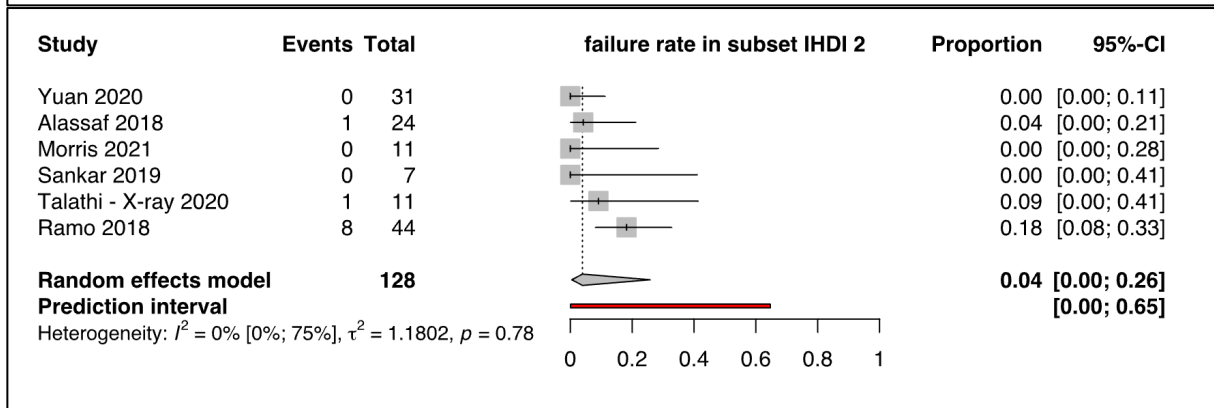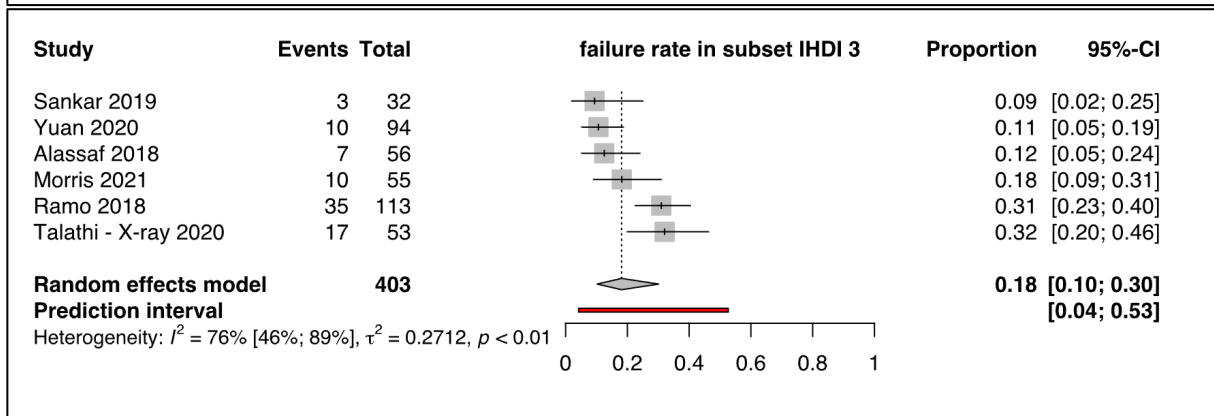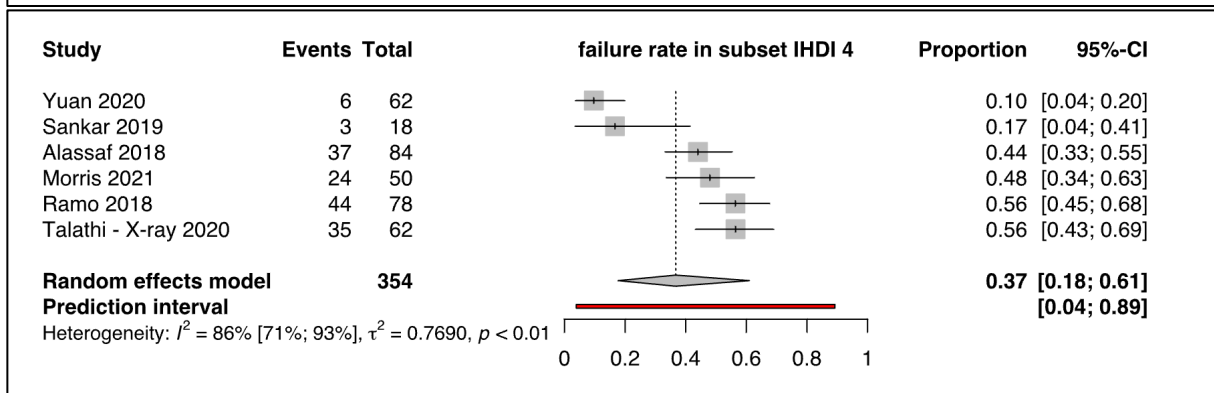

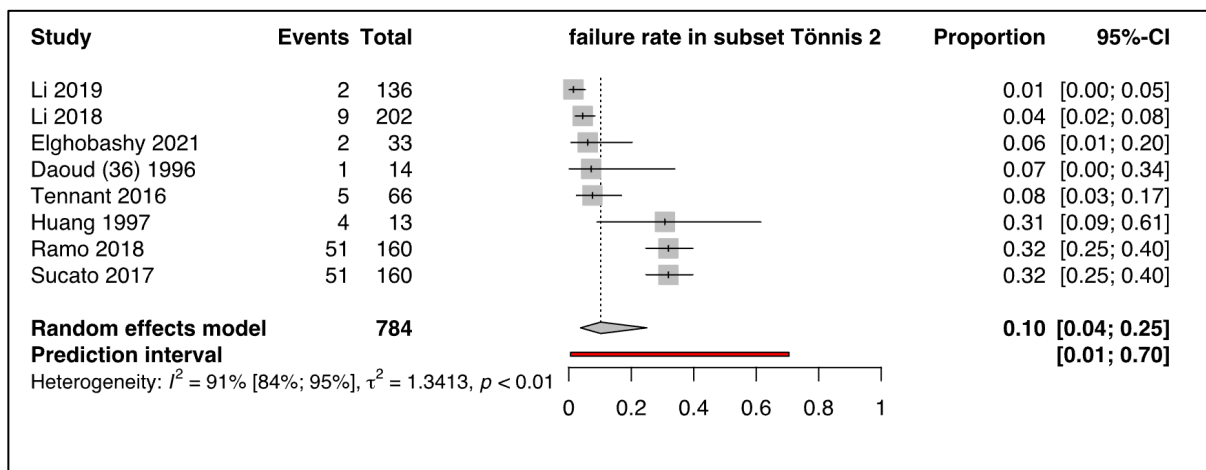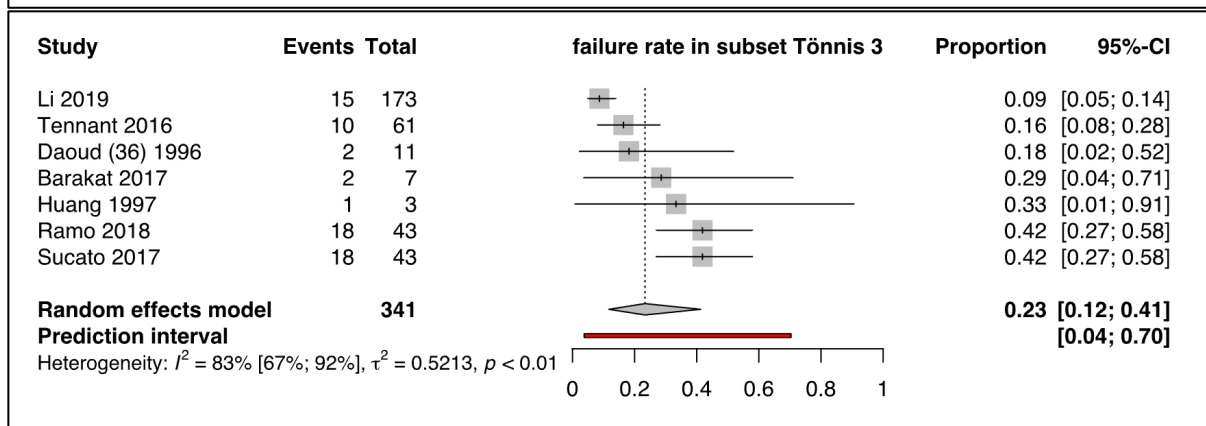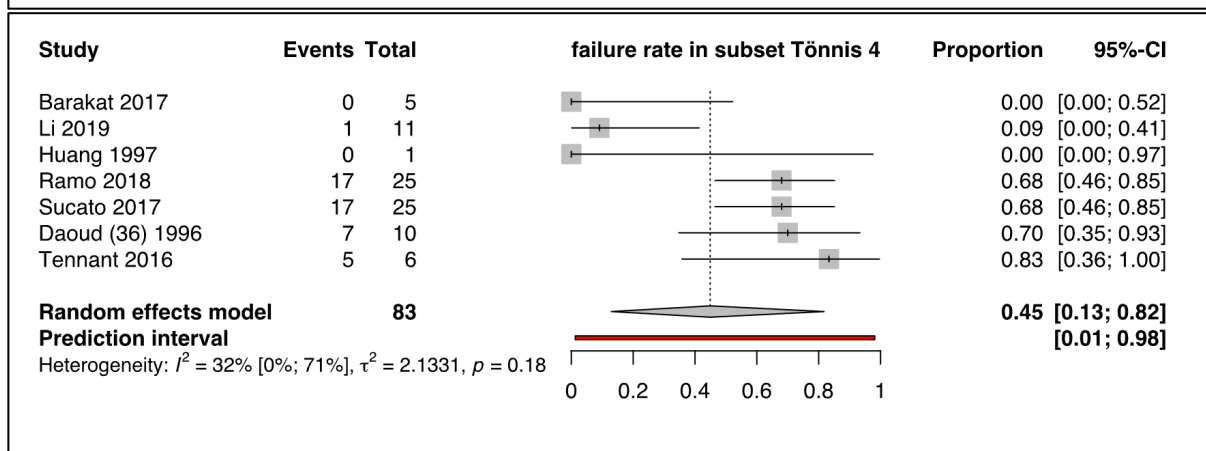

Supplement: EOR-24-0007supplementary_figure_13.pdf [file EOR-24-0007supplementary_figure_13.pdf]

## RISK FACTORS – INTRAOPERATIVE (GROUP 0-24)

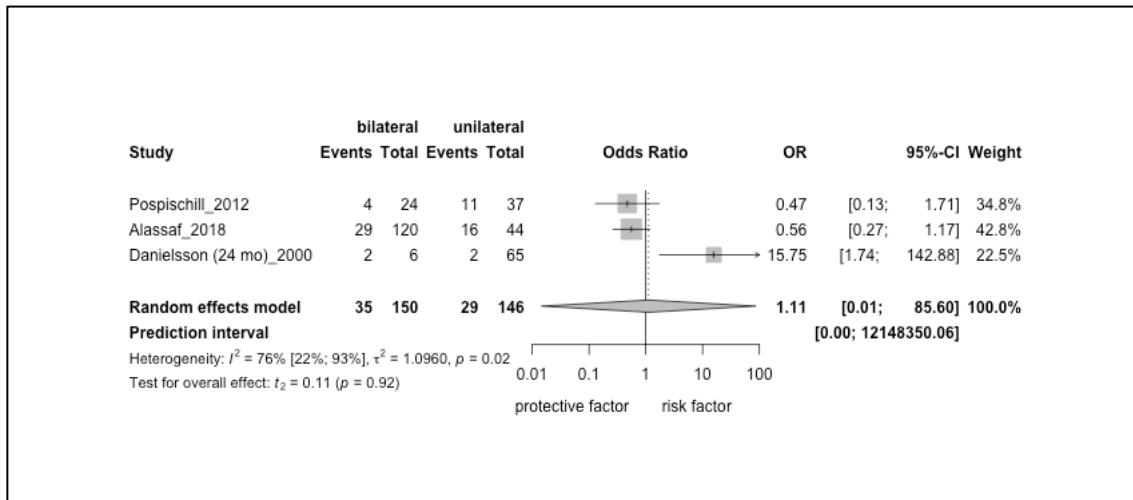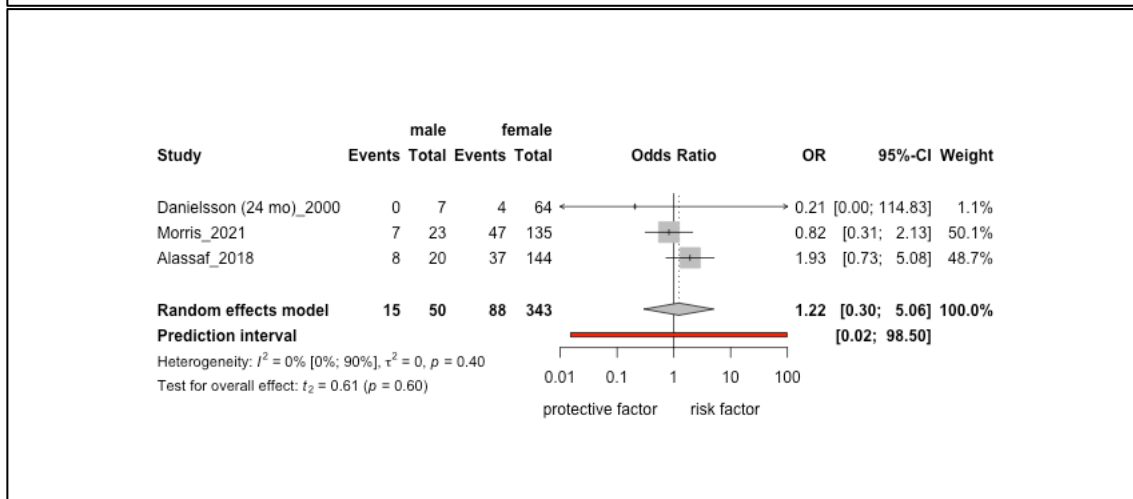

Supplement: EOR-24-0007supplementary_figure_14.pdf [file EOR-24-0007supplementary_figure_14.pdf]

## RISK FACTORS – INTRAOPERATIVE SUMMARY (GROUP 0-24)

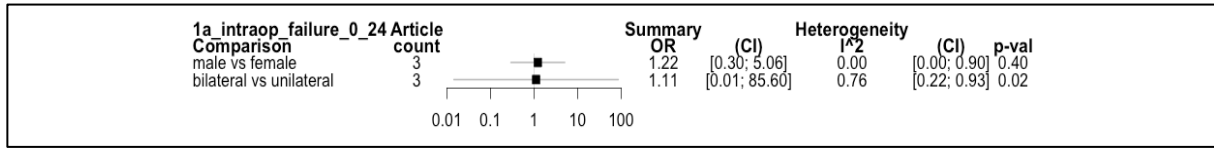

Supplement: EOR-24-0007supplementary_figure_15.pdf [file EOR-24-0007supplementary_figure_15.pdf]

## RISK FACTORS – FAILED REDUCTION (GROUP 0-24)

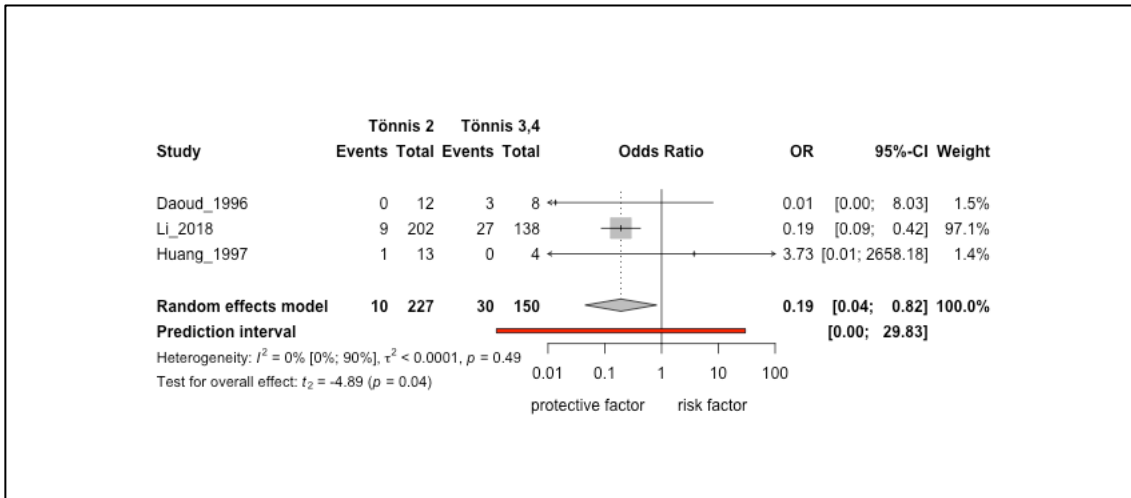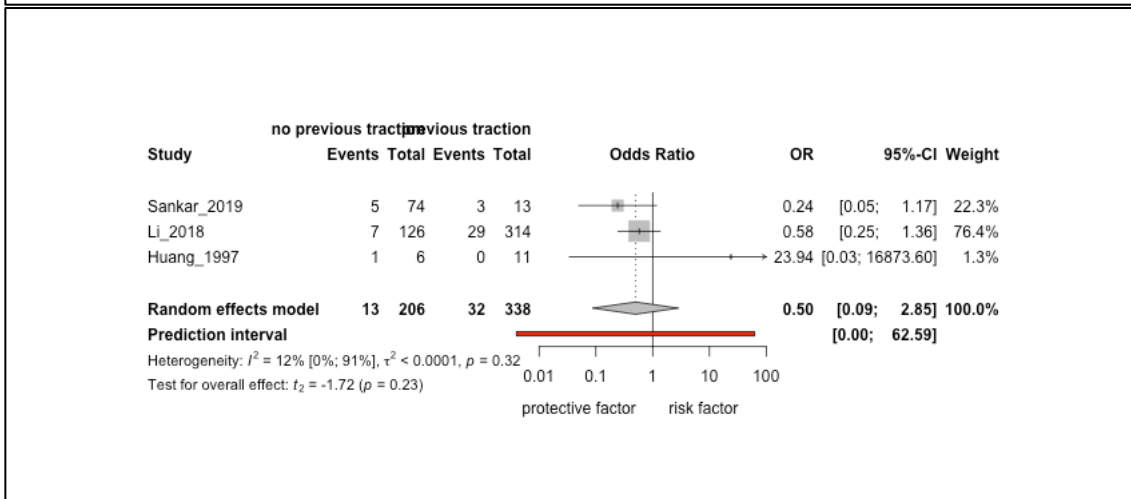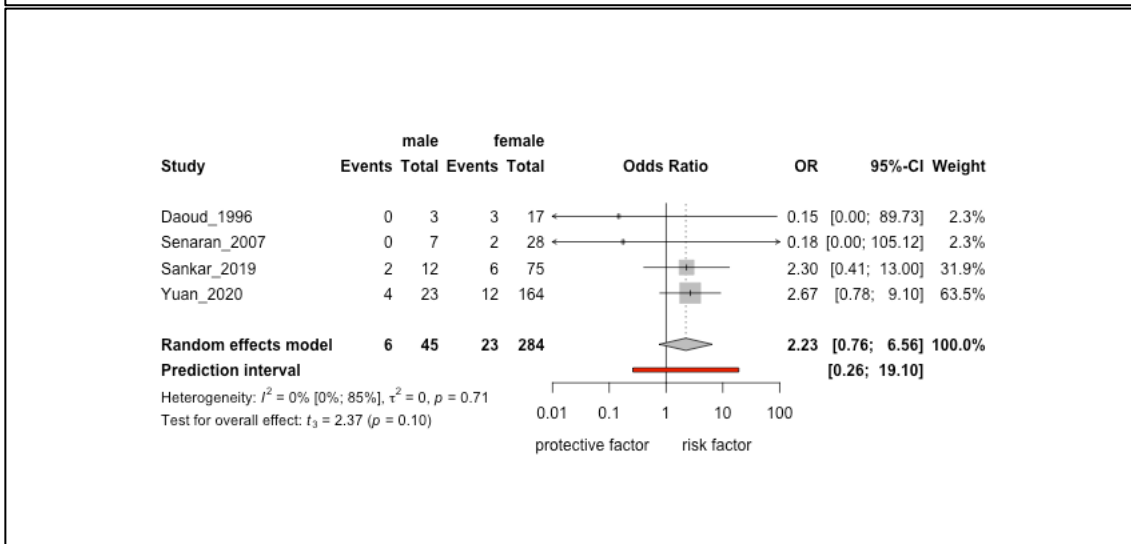

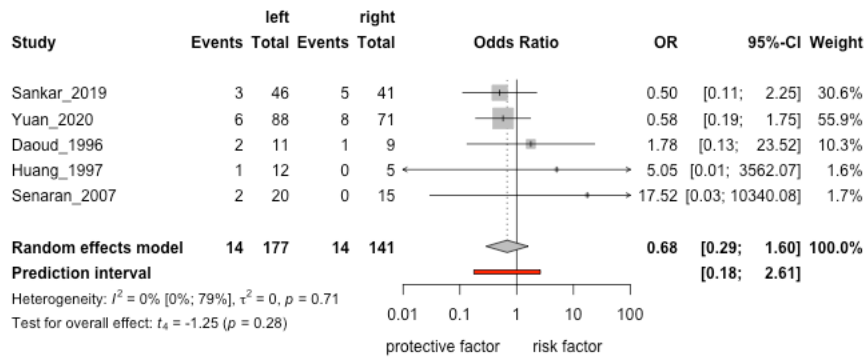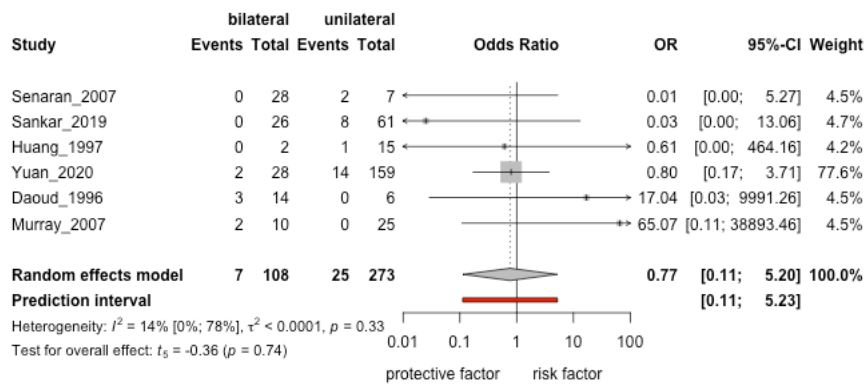

Supplement: EOR-24-0007supplementary_figure_16.pdf [file EOR-24-0007supplementary_figure_16.pdf]

## RISK FACTORS – FAILED REDUCTION SUMMARY (GROUP 0-24)

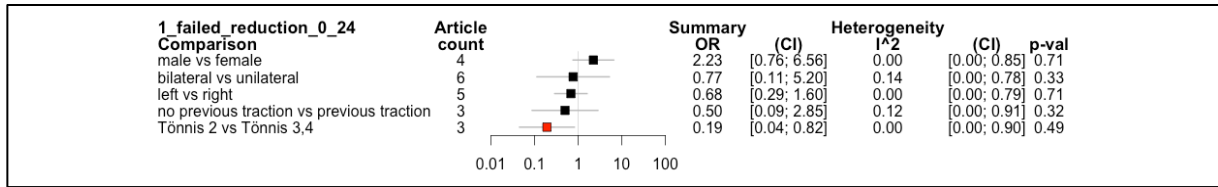

Supplement: EOR-24-0007supplementary_figure_17.pdf [file EOR-24-0007supplementary_figure_17.pdf]

## RISK FACTORS – FAILED REDUCTION (GROUP 0-36)

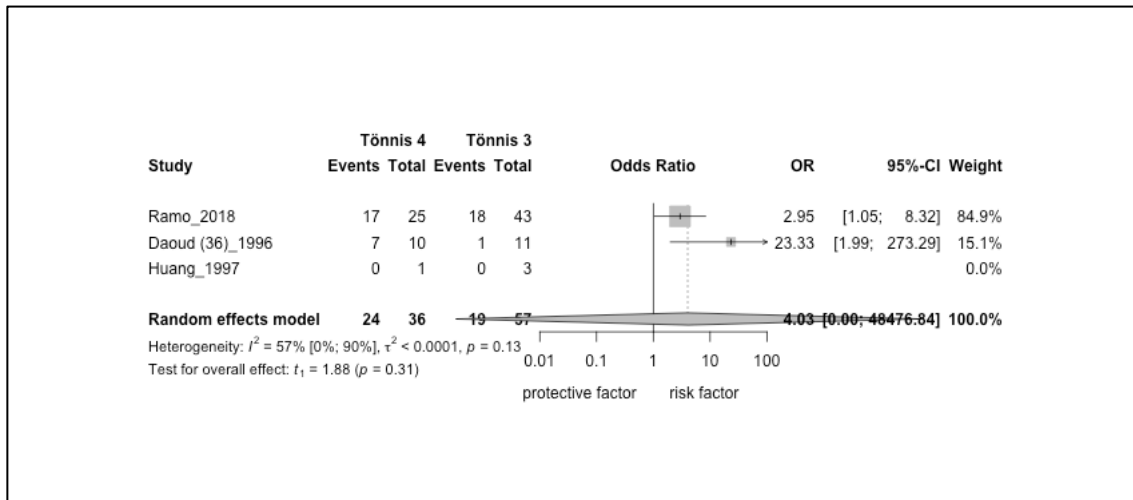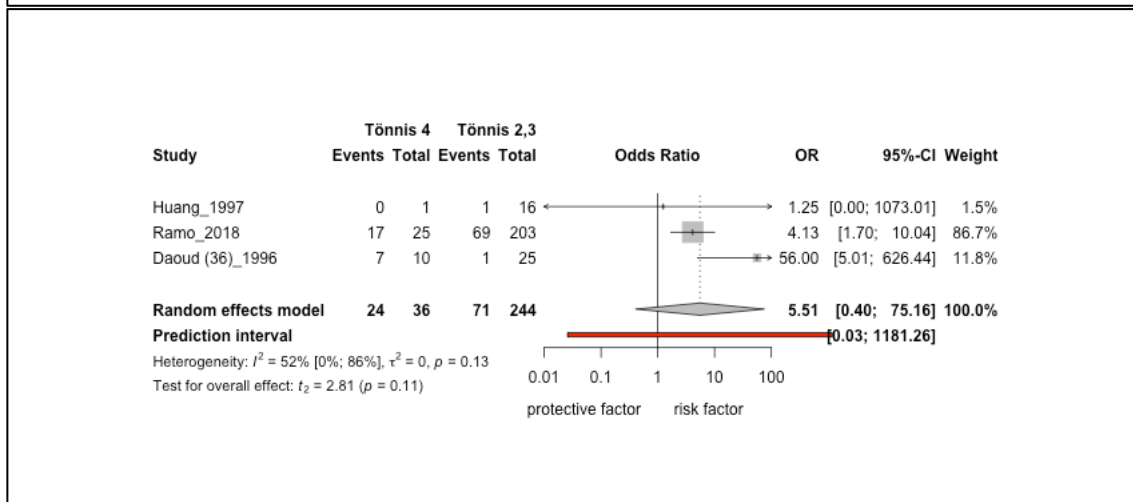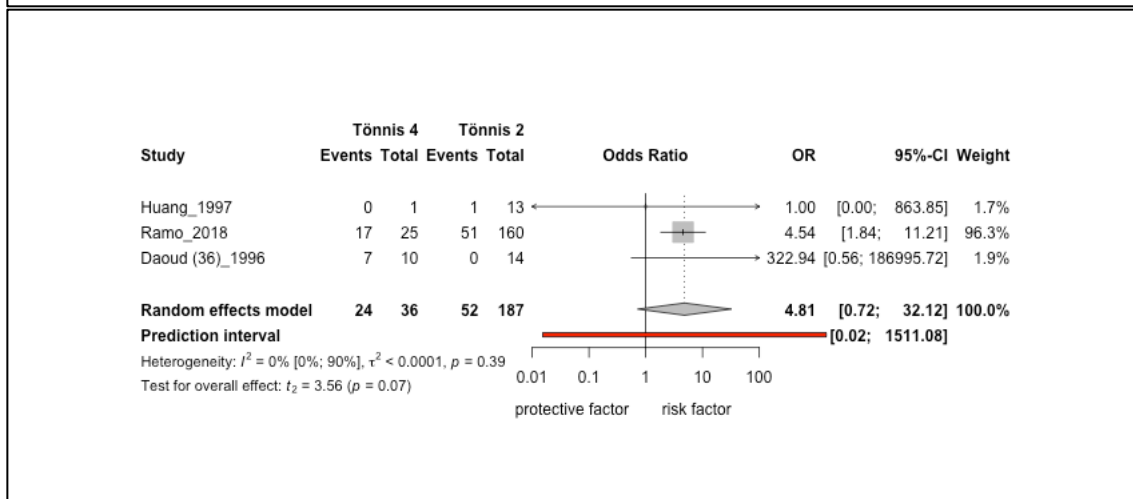

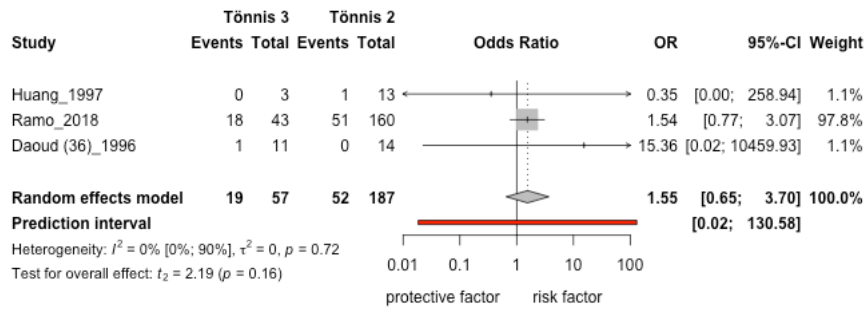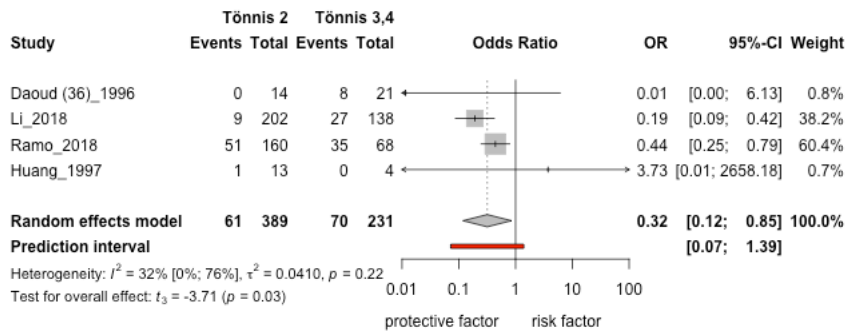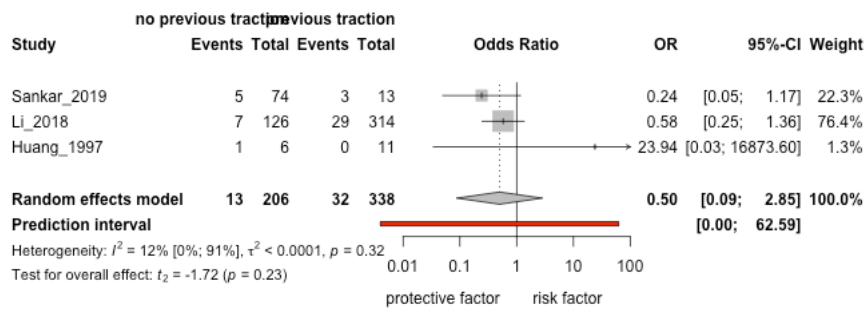

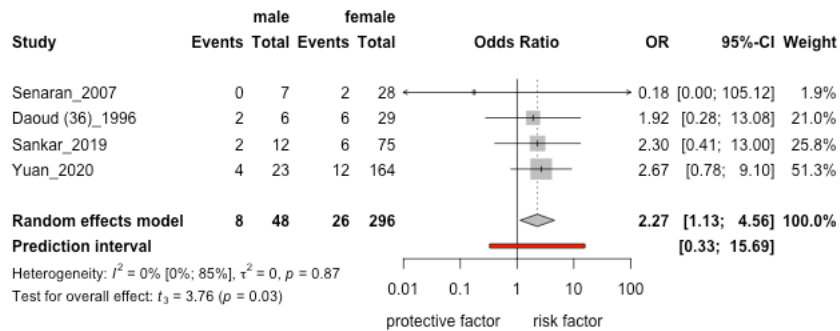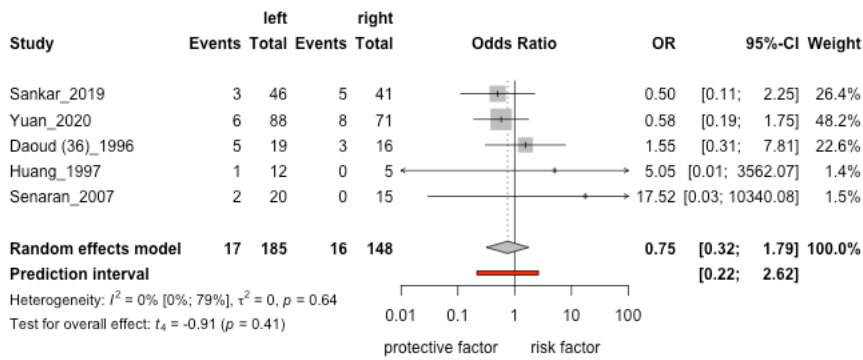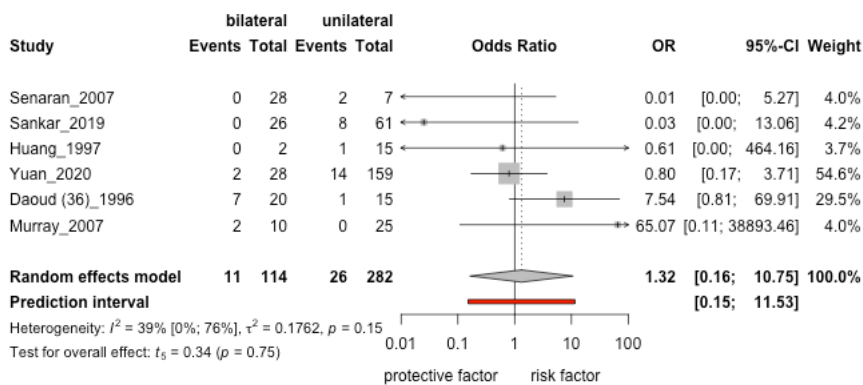

Supplement: EOR-24-0007supplementary_figure_18.pdf [file EOR-24-0007supplementary_figure_18.pdf]

## RISK FACTORS – FAILED REDUCTION SUMMARY (GROUP 0-36)

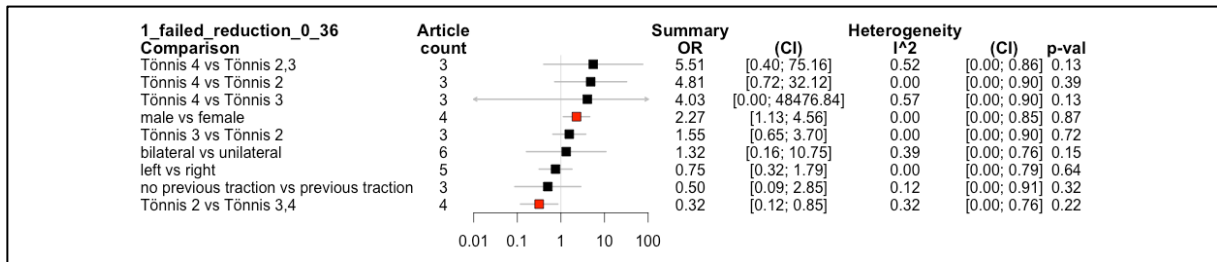

Supplement: EOR-24-0007supplementary_figure_19.pdf [file EOR-24-0007supplementary_figure_19.pdf]

## RISK FACTORS – REDISLOCATION SUMMARY (GROUP 0-24)

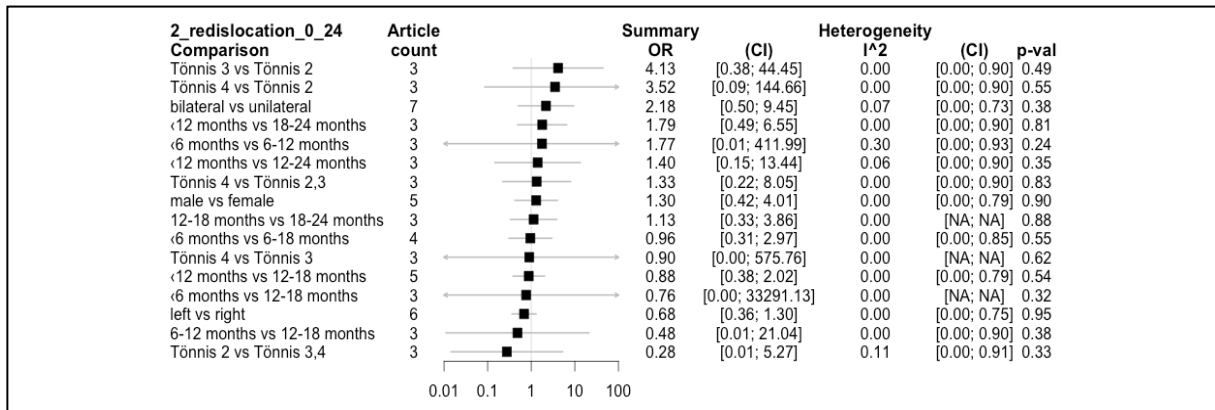

Supplement: EOR-24-0007supplementary_figure_2.pdf [file EOR-24-0007supplementary_figure_2.pdf]

## RISK FACTORS – REDISLOCATION (GROUP 0-24)

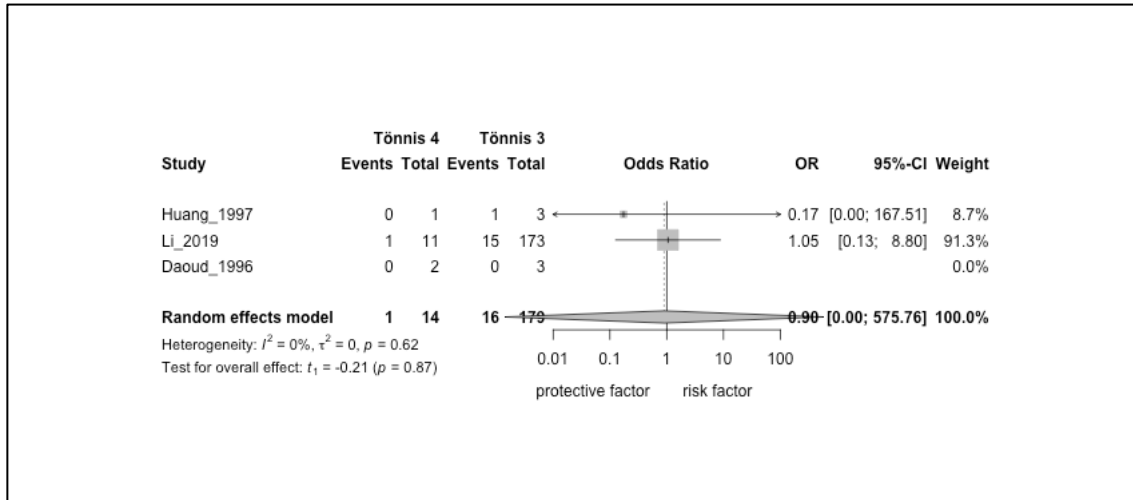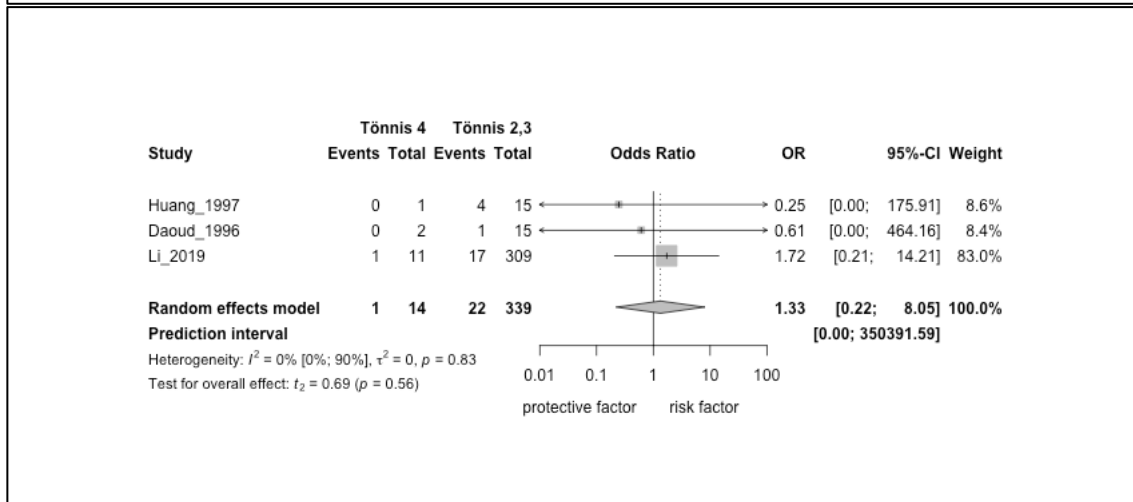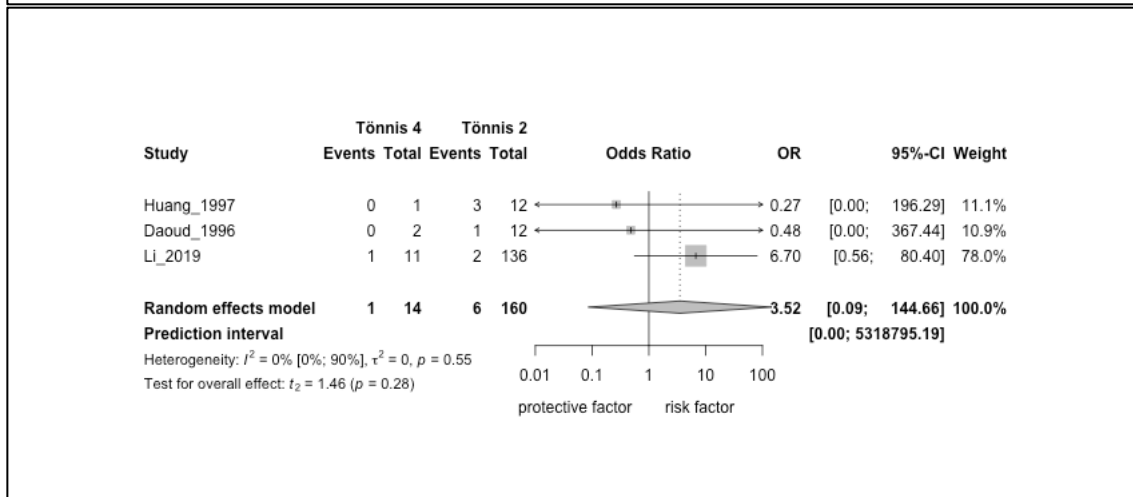

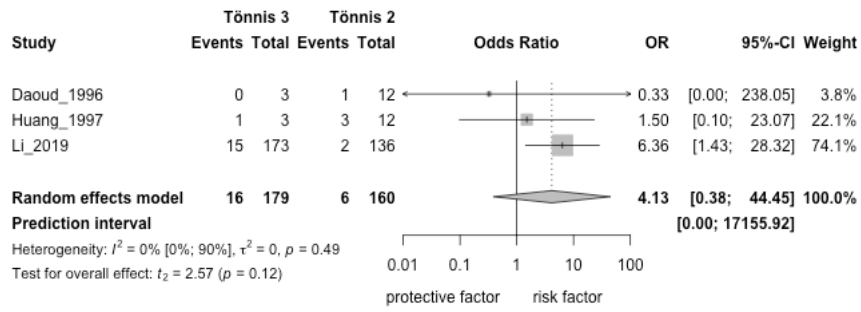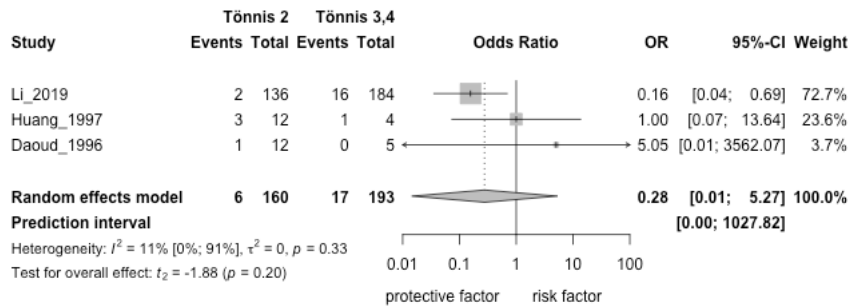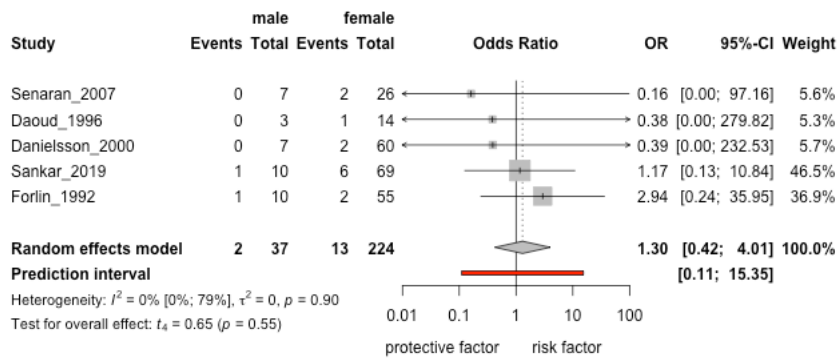

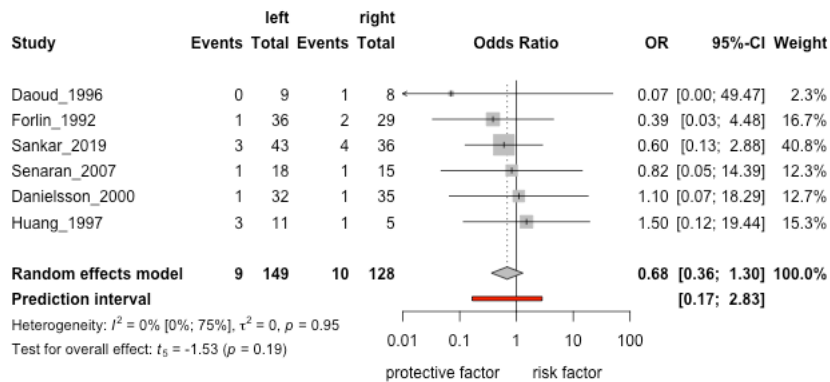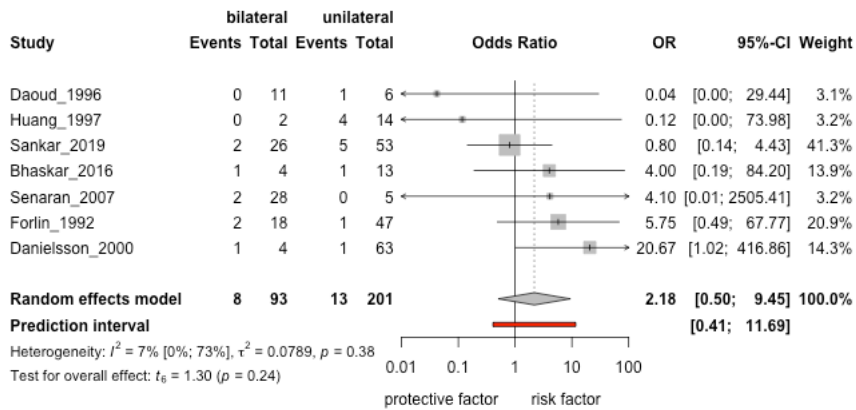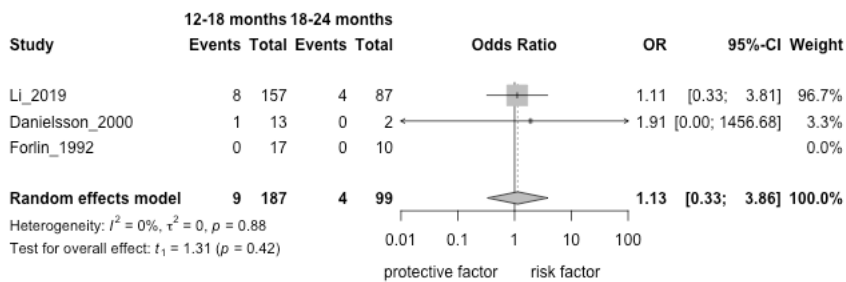

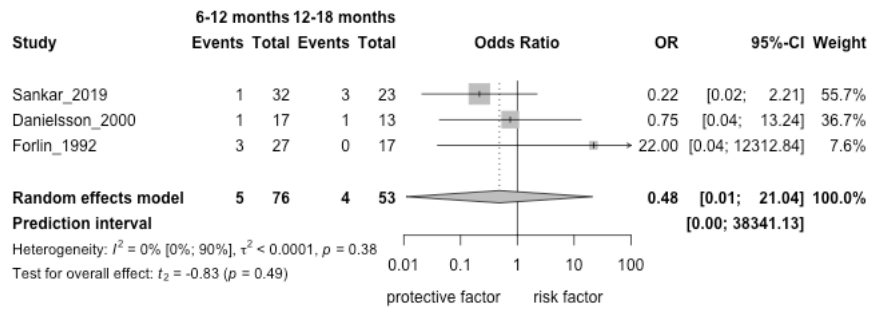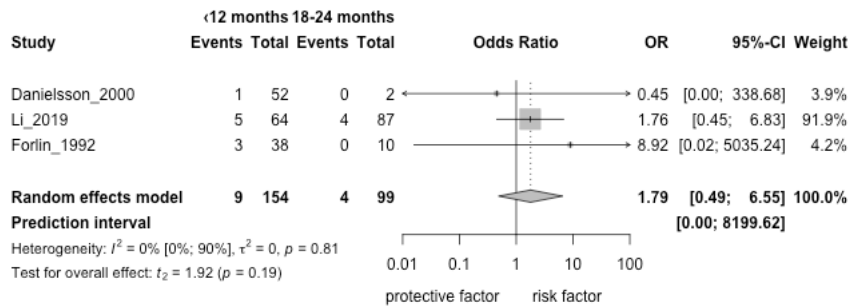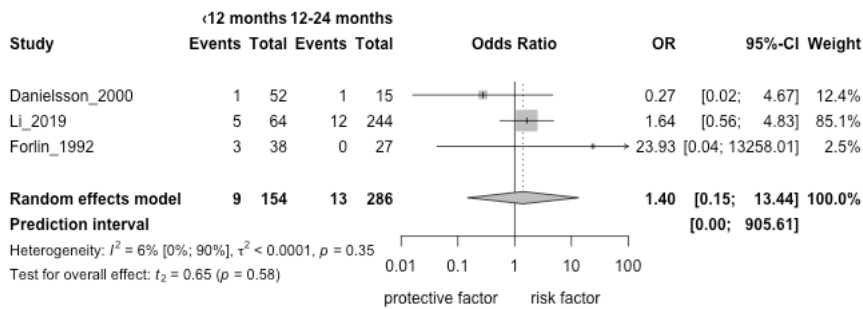

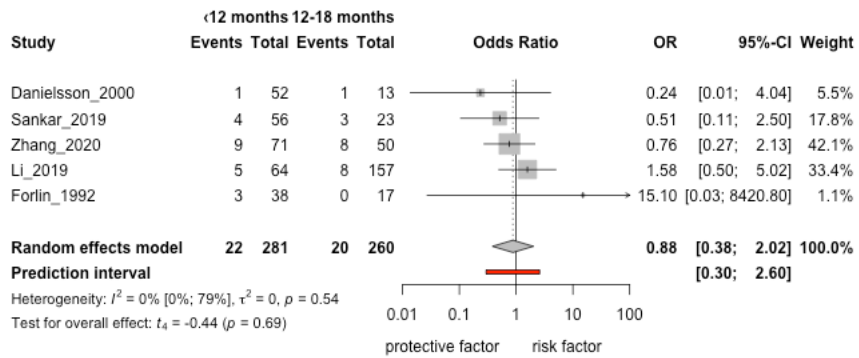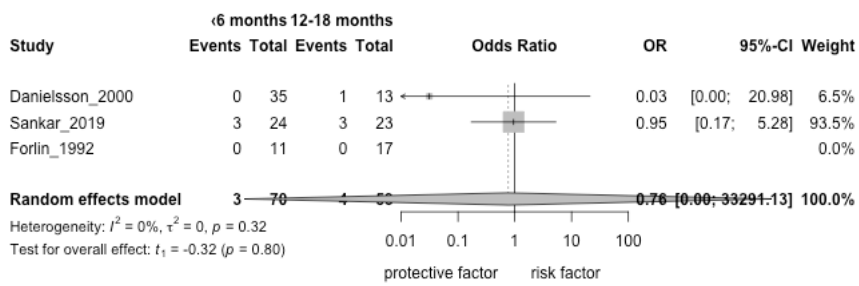

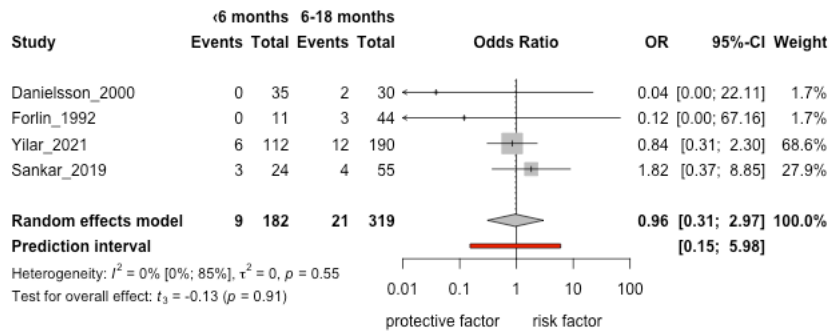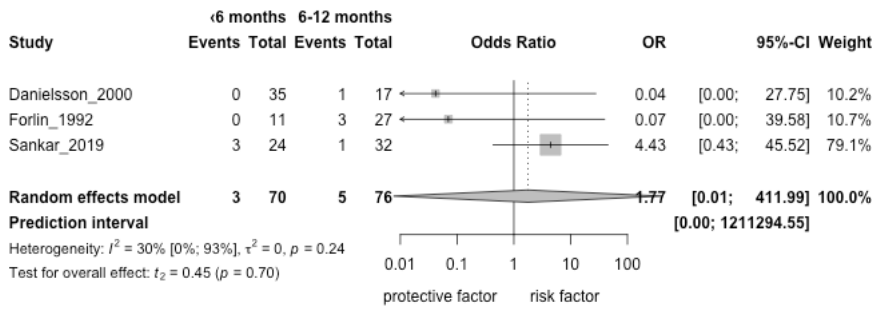

Supplement: EOR-24-0007supplementary_figure_20.pdf [file EOR-24-0007supplementary_figure_20.pdf]

## RISK FACTORS – REDISLOCATION (GROUP 0-36)

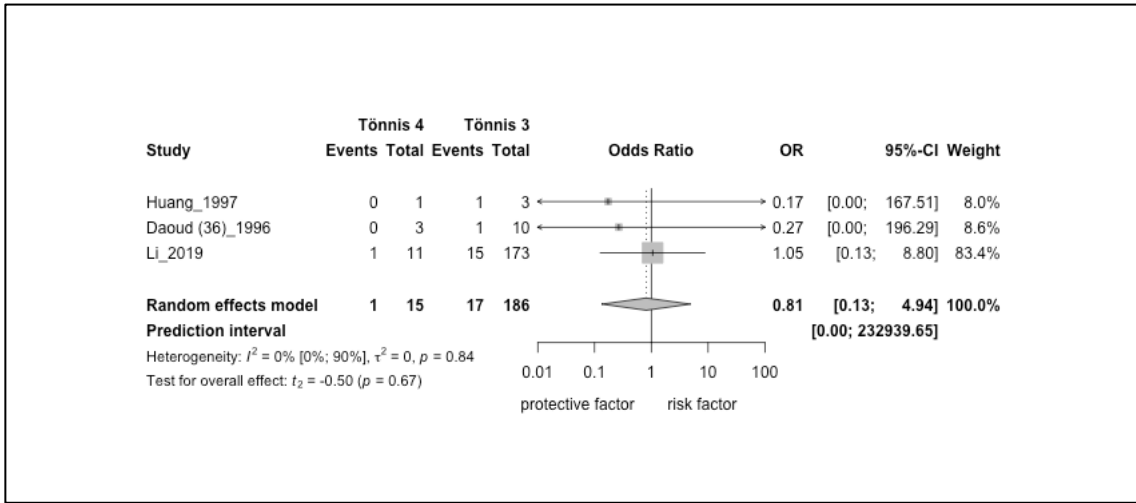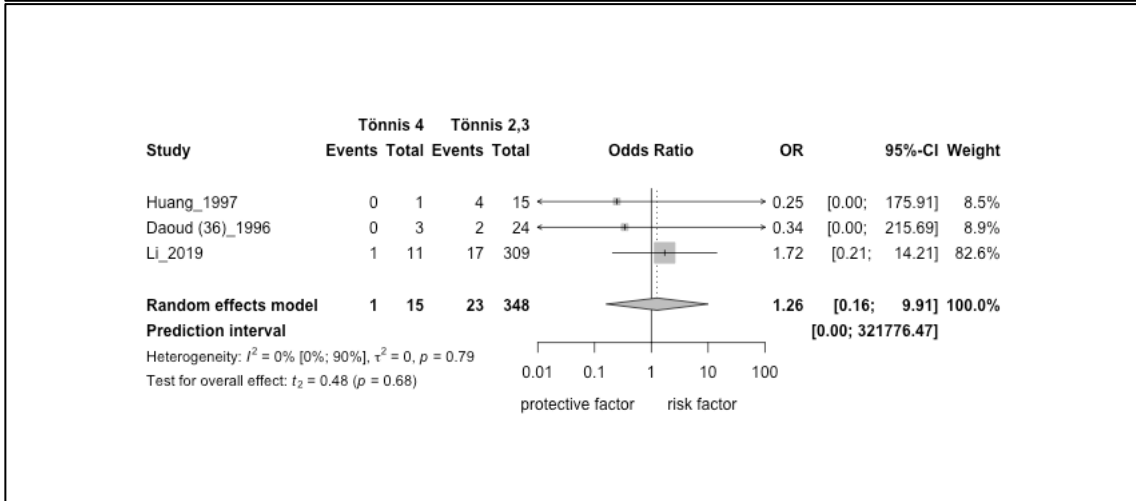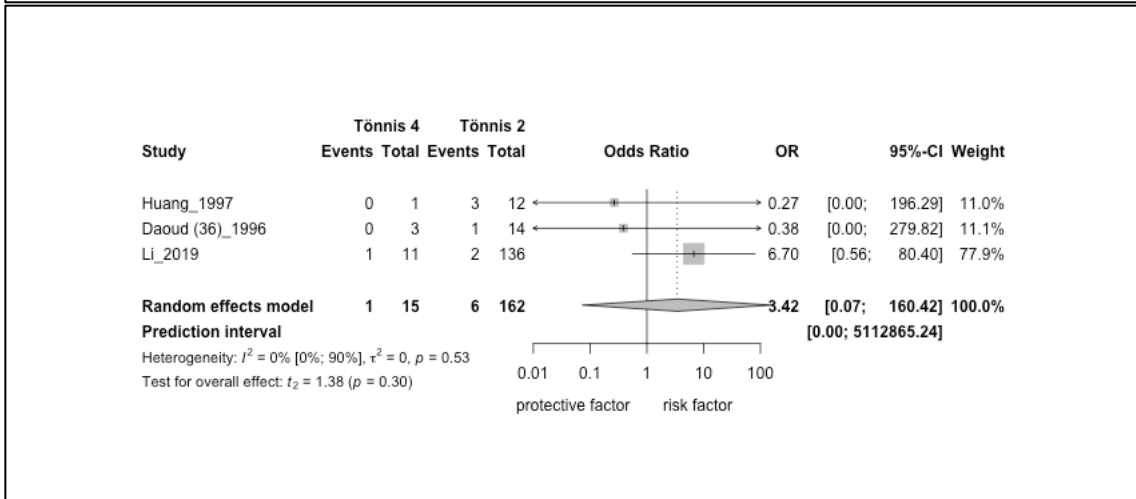

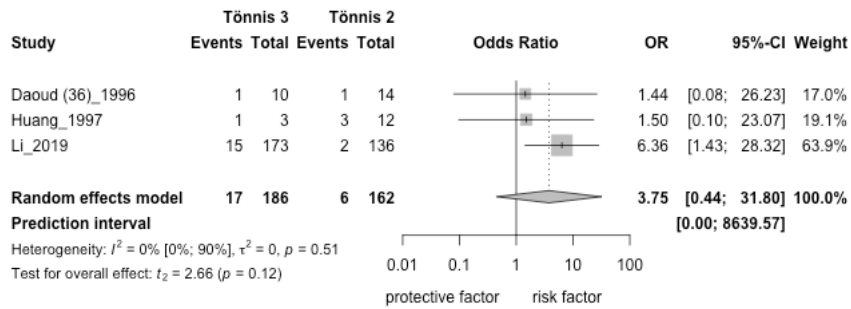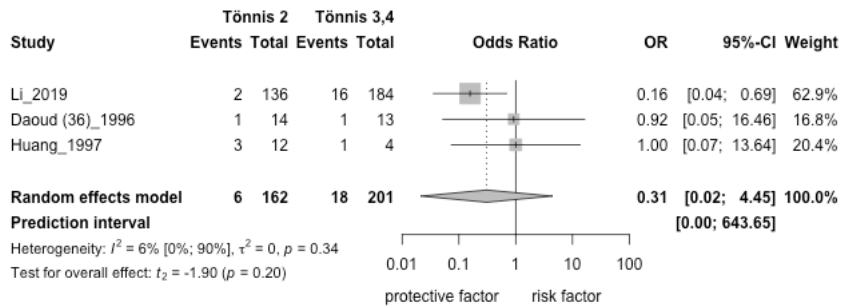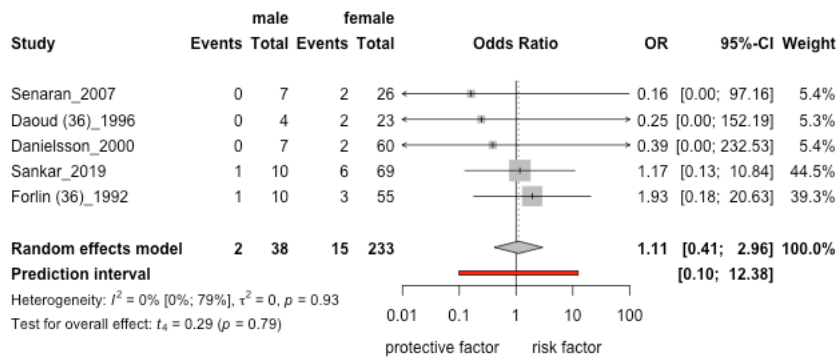

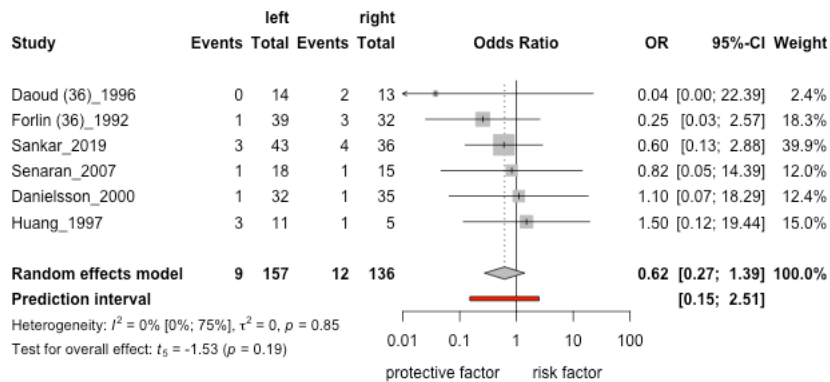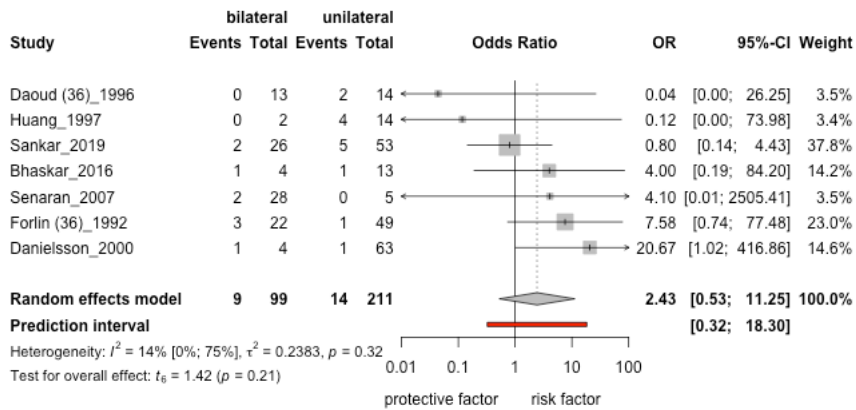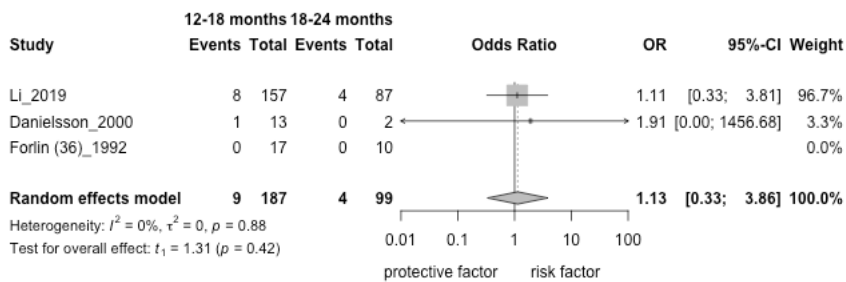

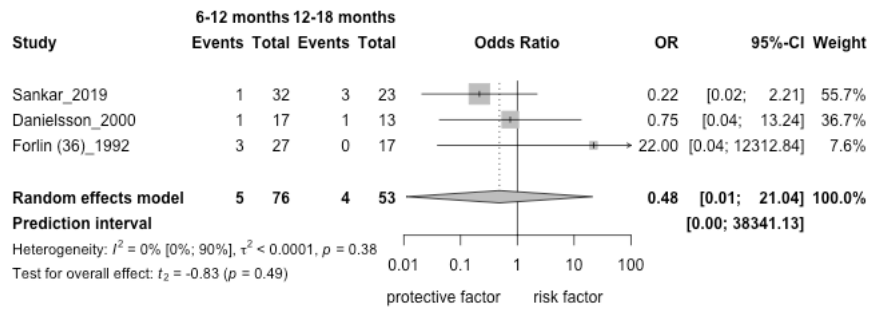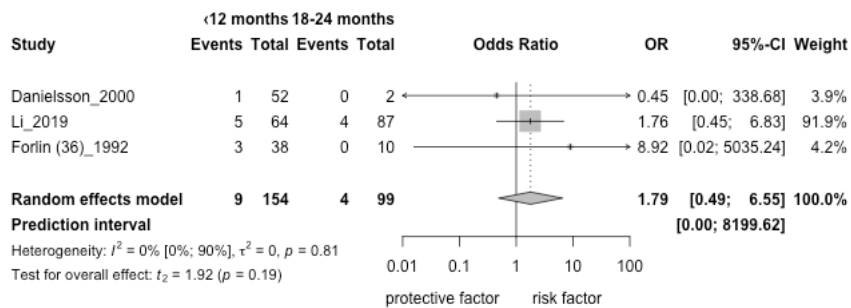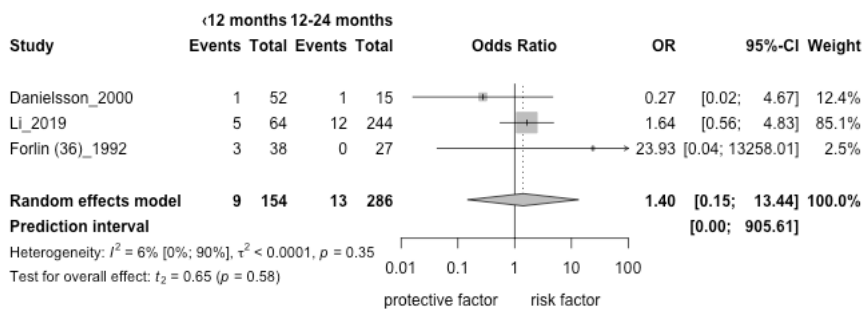

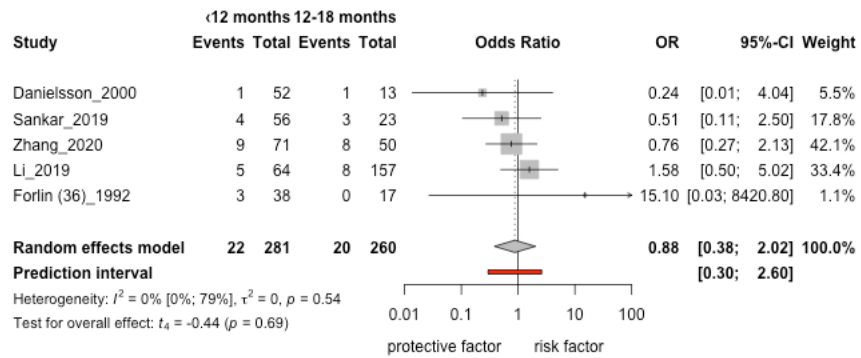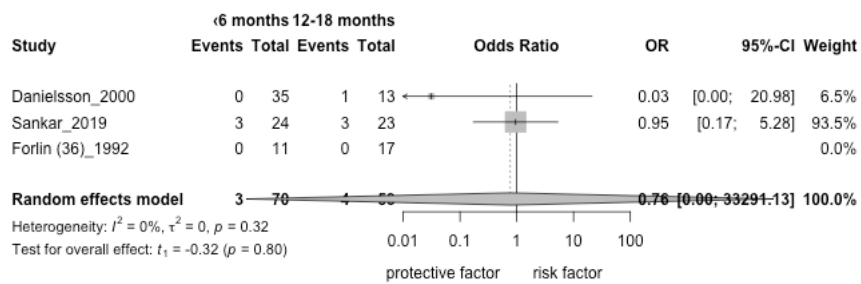

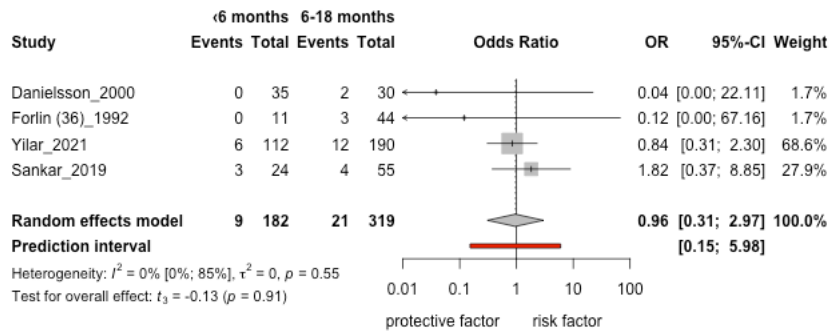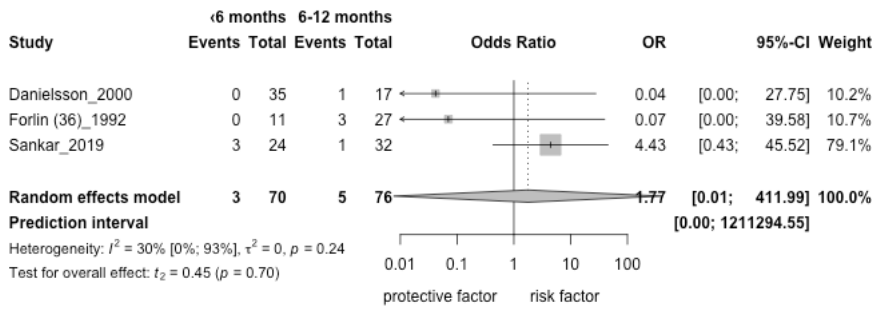

Supplement: EOR-24-0007supplementary_figure_3.pdf [file EOR-24-0007supplementary_figure_3.pdf]

## RISK FACTORS – REDISLOCATION SUMMARY (GROUP 0-36)

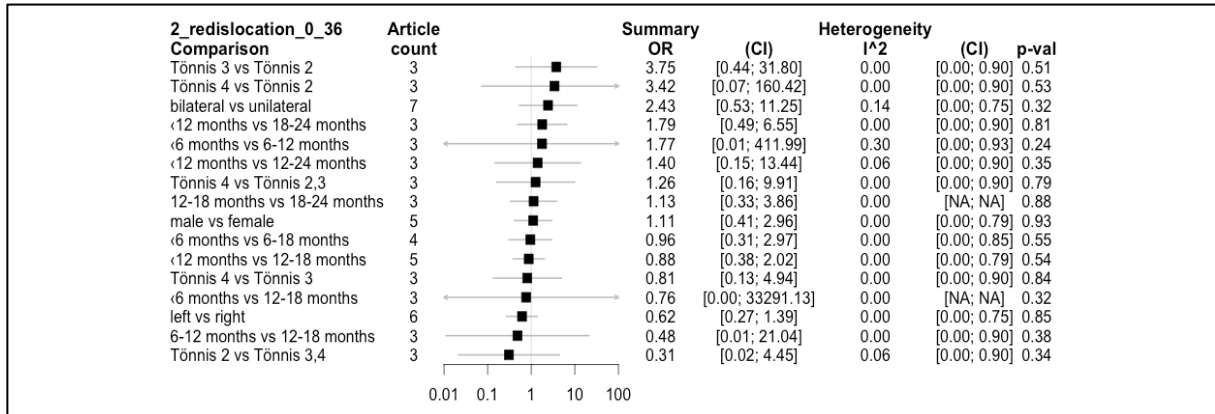

Supplement: EOR-24-0007supplementary_figure_4.pdf [file EOR-24-0007supplementary_figure_4.pdf]

## RISK FACTORS – OVERALL FAILURE (GROUP 0-24)

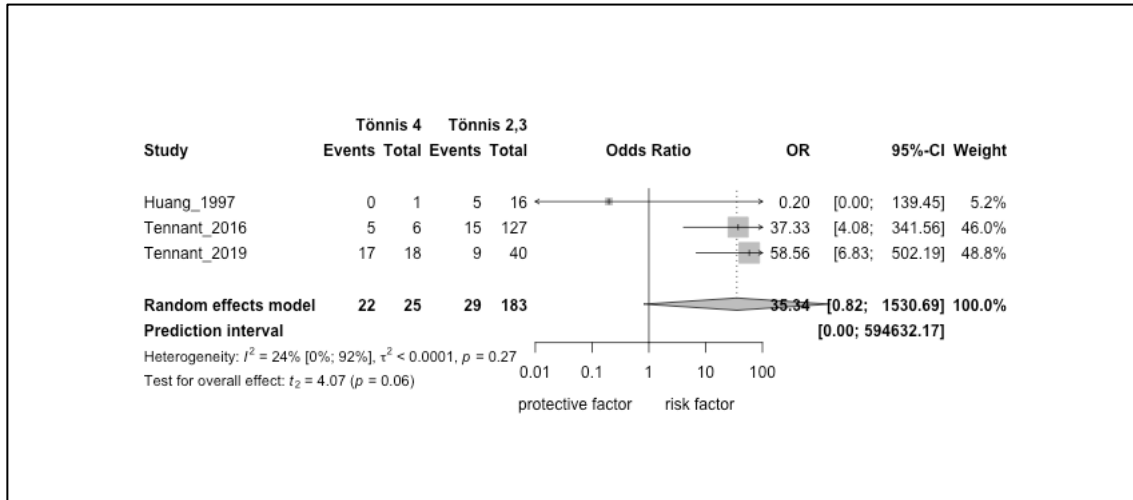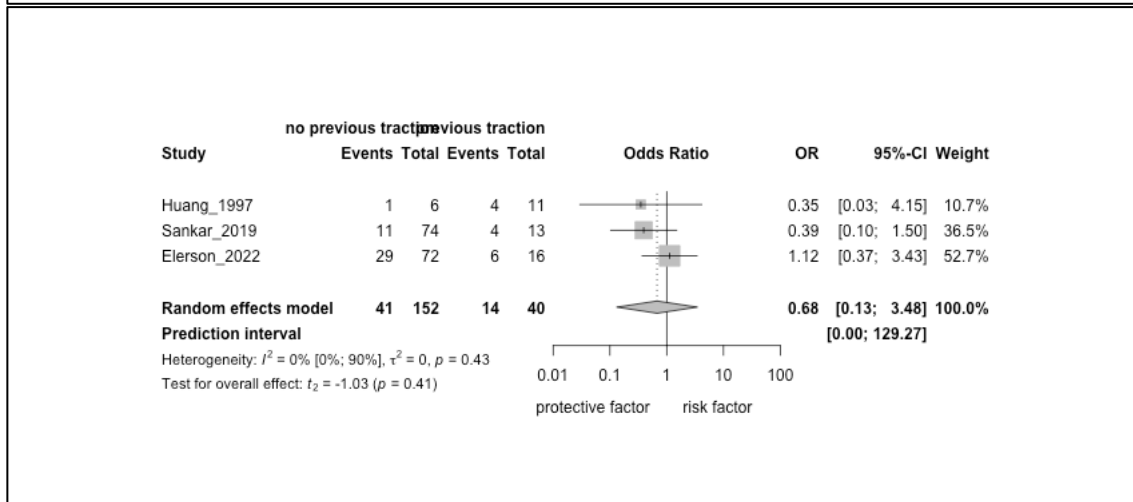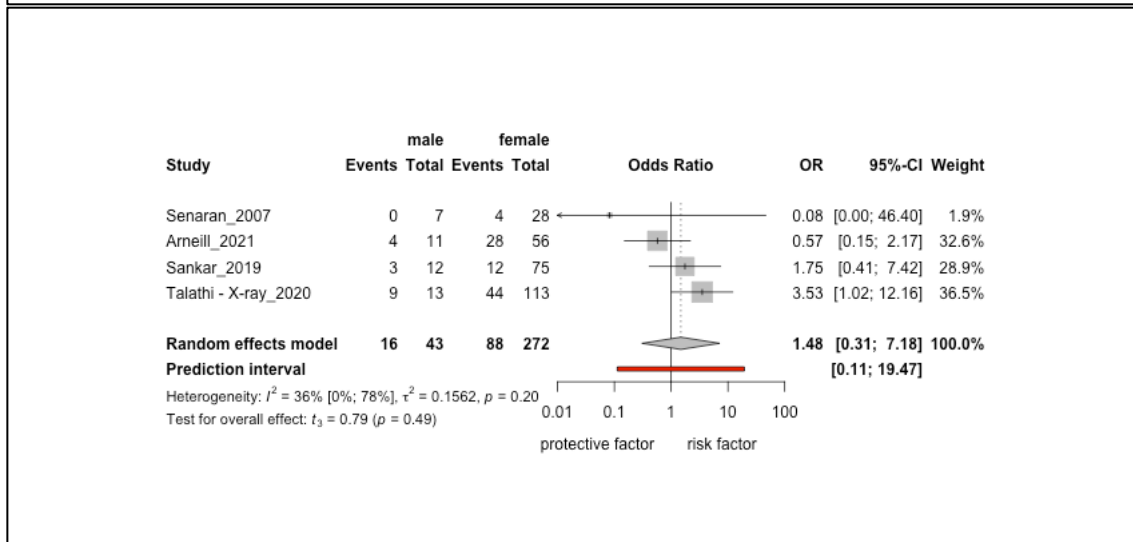

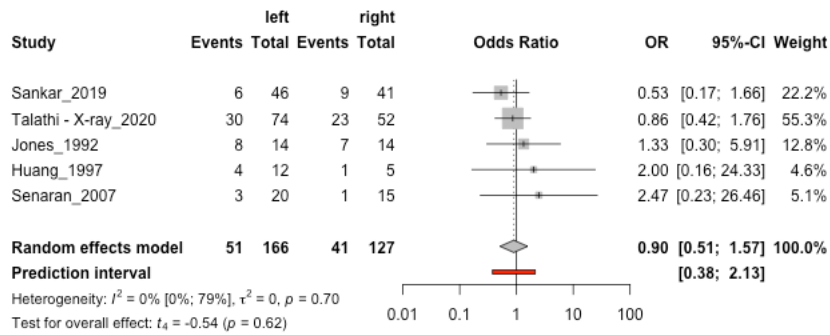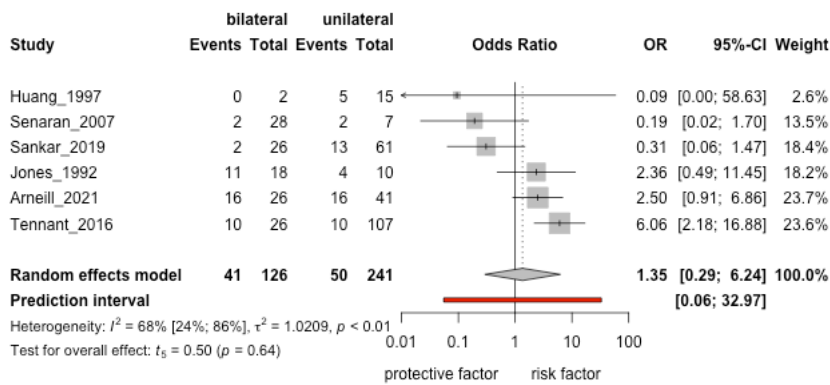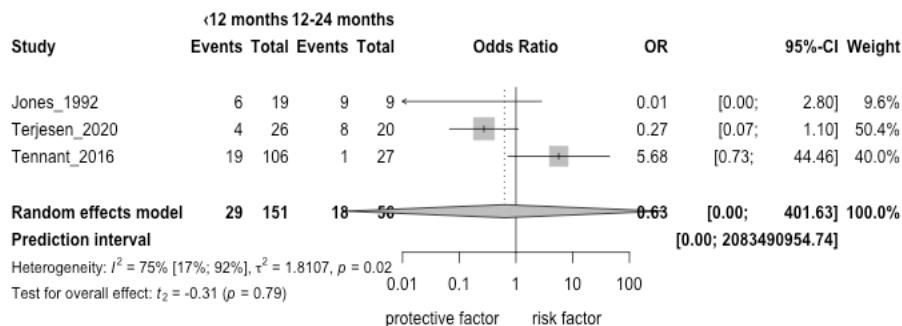

Supplement: EOR-24-0007supplementary_figure_5.pdf [file EOR-24-0007supplementary_figure_5.pdf]

## RISK FACTORS – OVERALL FAILURE SUMMARY (GROUP 0-24)

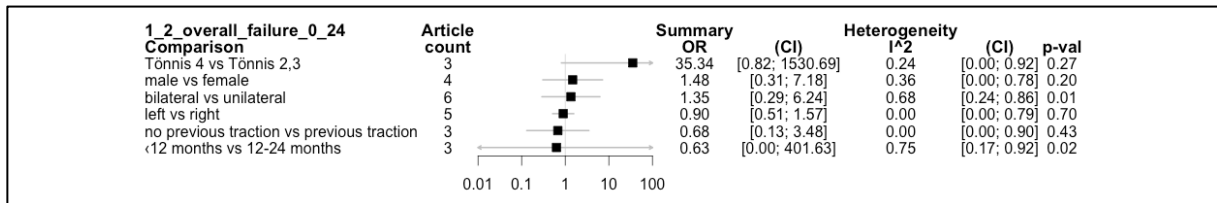

Supplement: EOR-24-0007supplementary_figure_6.pdf [file EOR-24-0007supplementary_figure_6.pdf]

## RISK FACTORS – OVERALL FAILURE (GROUP 0-36)

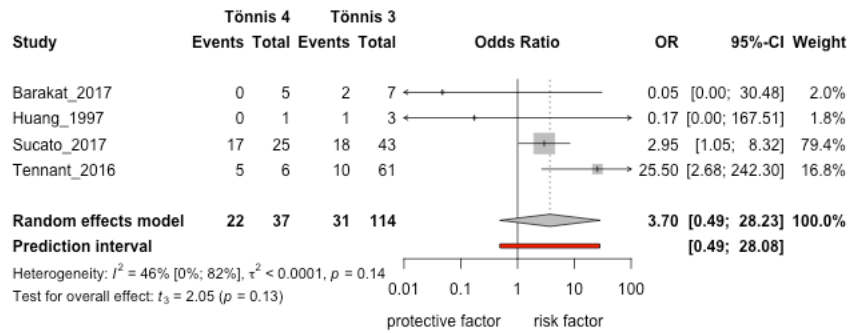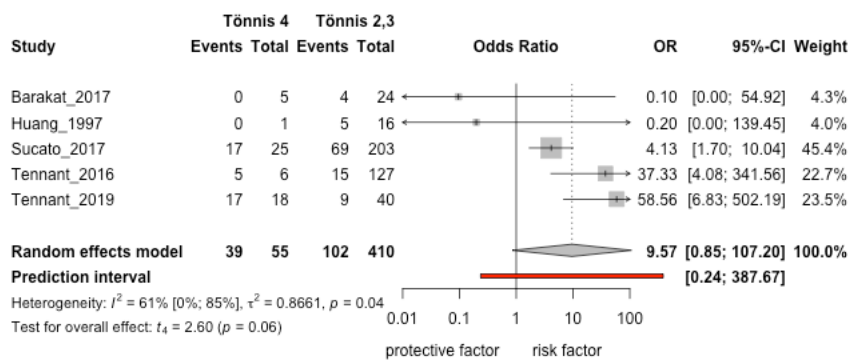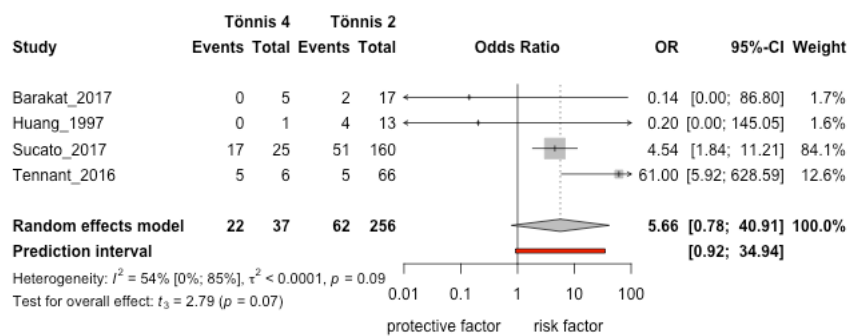

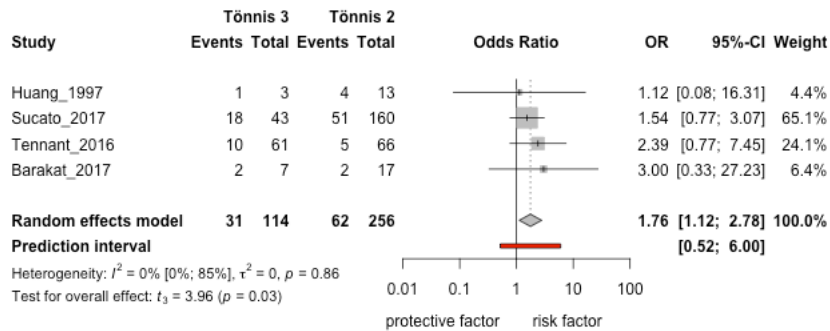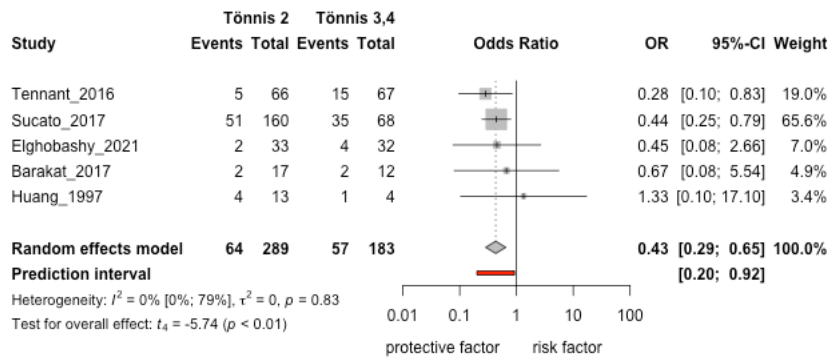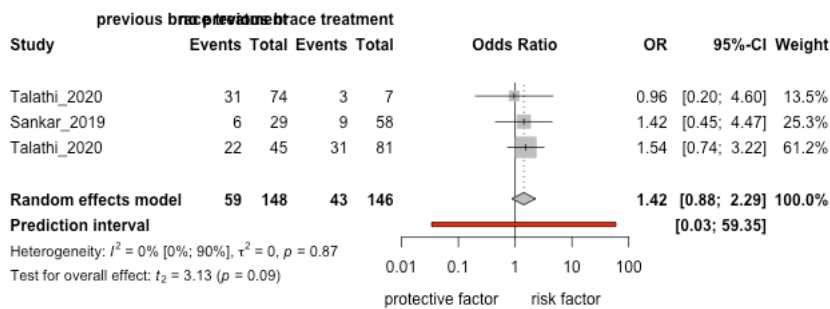

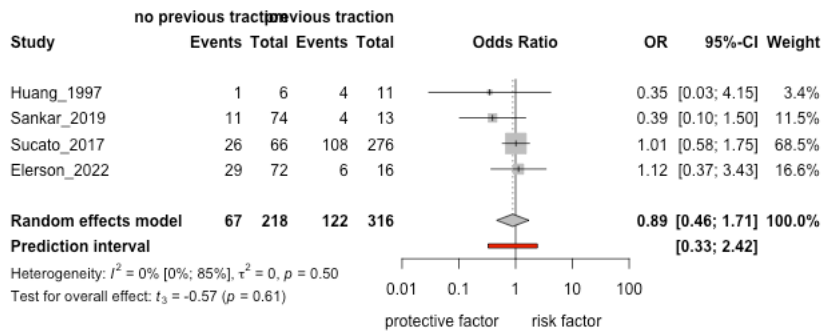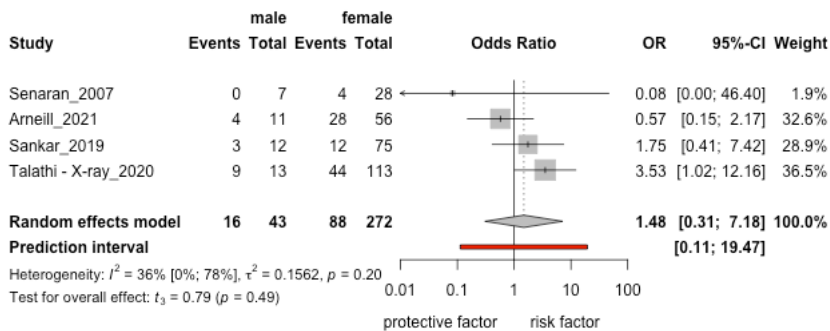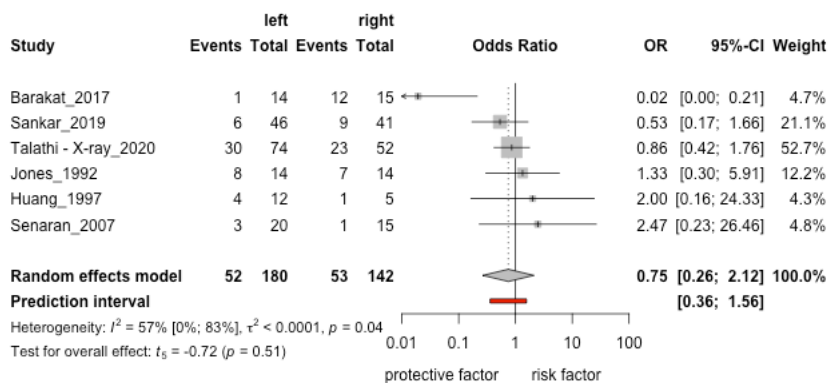

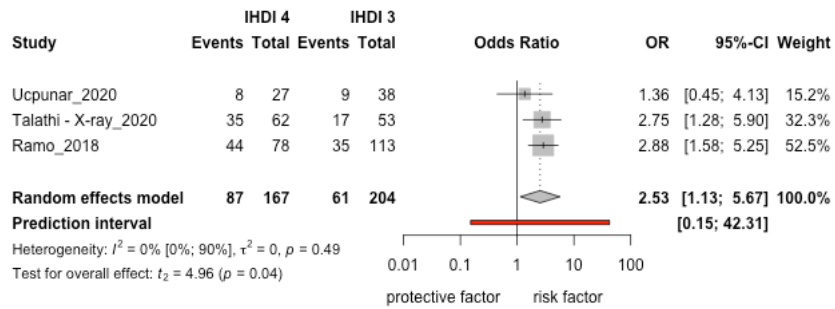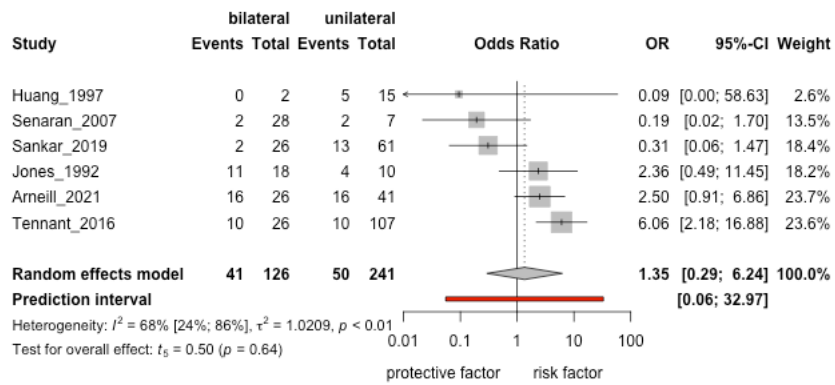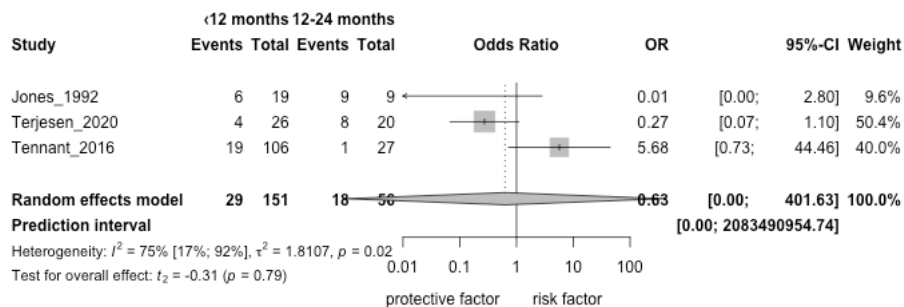

Supplement: EOR-24-0007supplementary_figure_7.pdf [file EOR-24-0007supplementary_figure_7.pdf]

## RISK FACTORS – OVERALL FAILURE SUMMARY (GROUP 0-36)

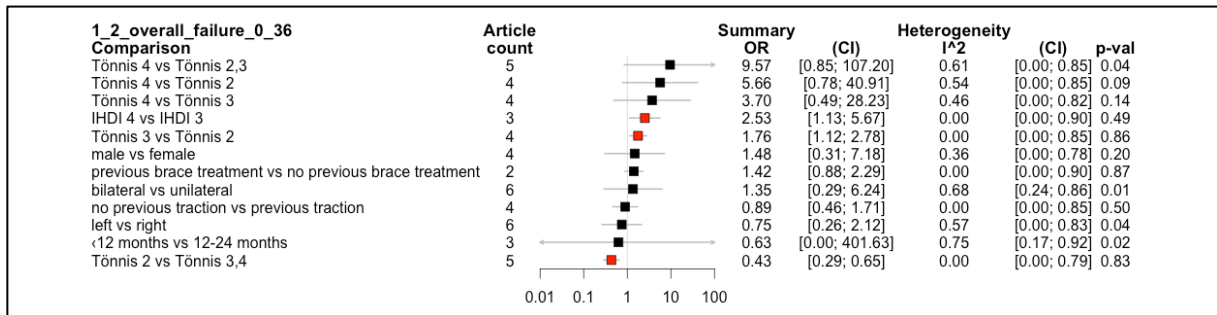

Supplement: EOR-24-0007supplementary_figure_8.pdf [file EOR-24-0007supplementary_figure_8.pdf]

## FAILURE RATES IN DIFFERENT TREATMENT STEPS (GROUP 0-24)

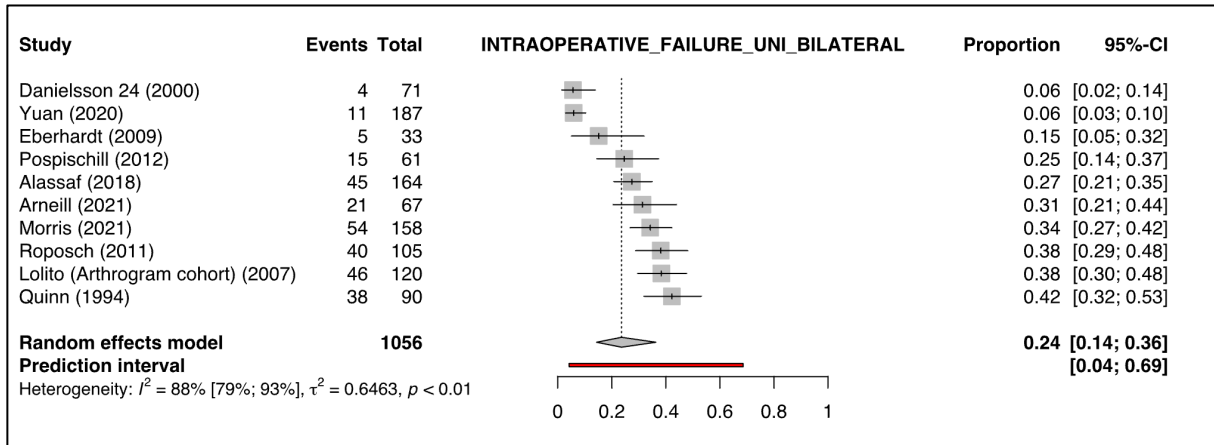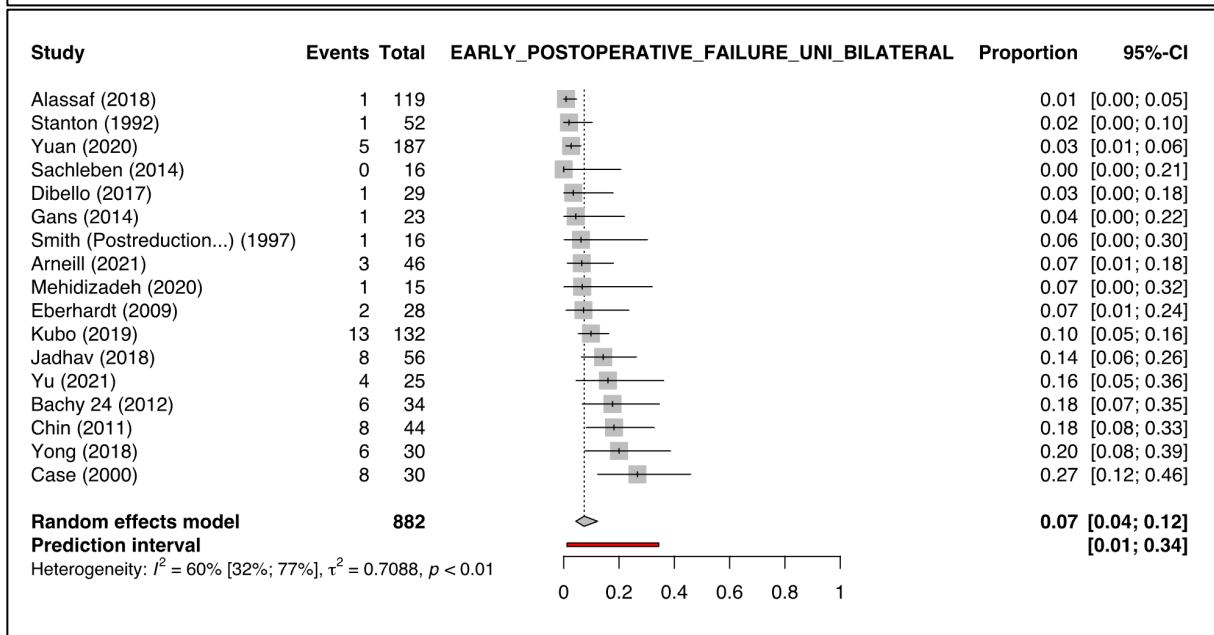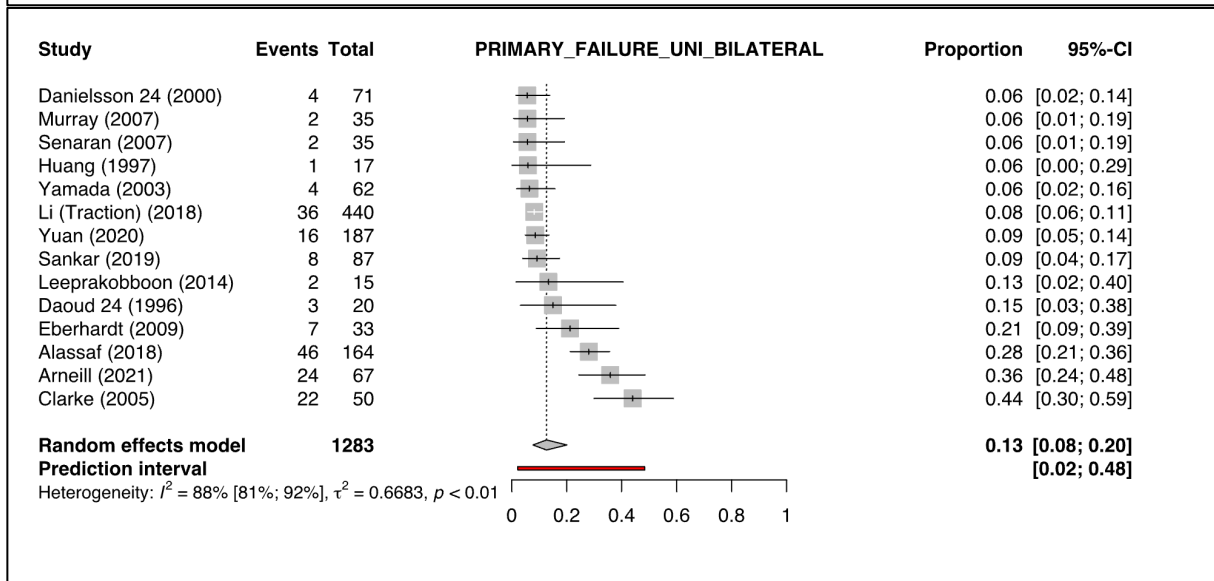

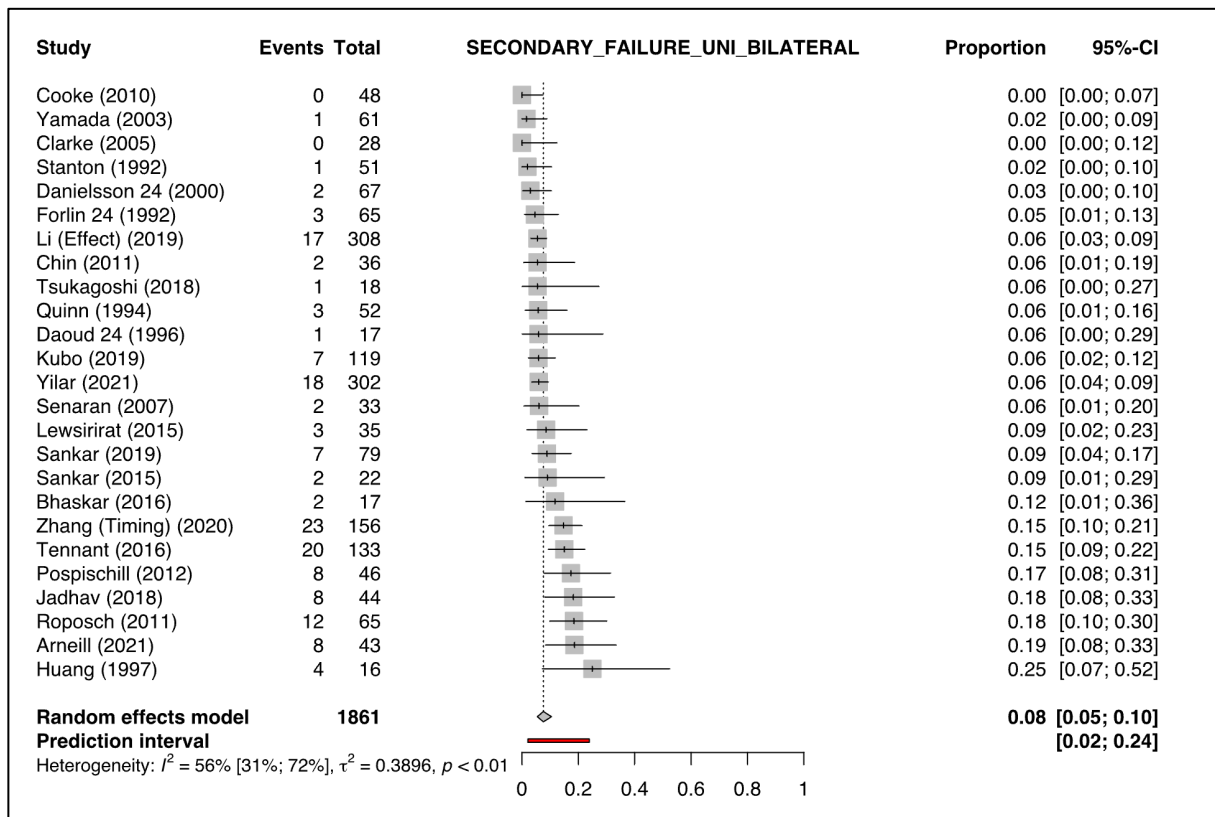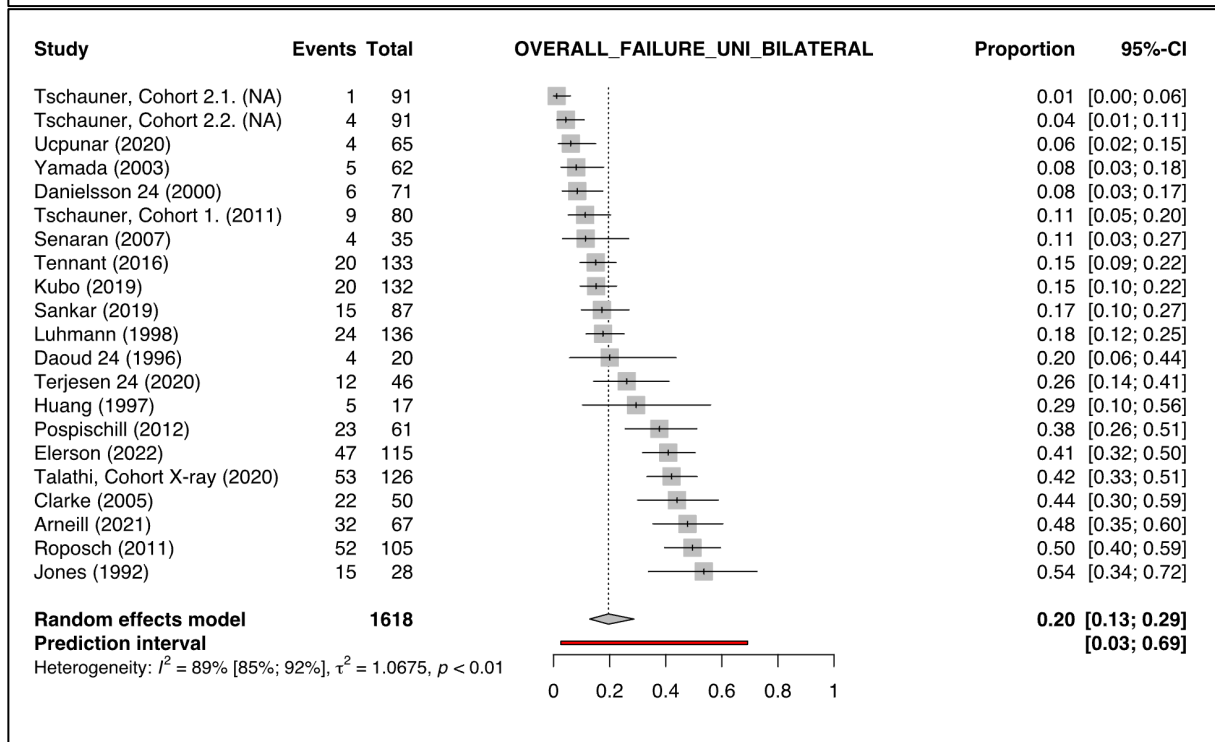

Supplement: EOR-24-0007supplementary_figure_9.pdf [file EOR-24-0007supplementary_figure_9.pdf]
